# Supplementary material for: Intermolecular C–H silylations of arenes and heteroarenes with mono-, bis-, and tris(trimethylsiloxy)hydrosilanes: control of silane redistribution under operationally diverse approaches
Source: Royal Society of Chemistry journal article supplement (doi:10.1039/d4sc03394a), 2024-01-01
Supplement: d4sc03394a1.pdf [file d4sc03394a1.pdf]

# **Intermolecular C–H Silylations of Arenes and Heteroarenes with Mono-, Bis-, and Tris(trimethylsiloxy)hydrosilanes: Control of Silane Redistribution under Operationally Diverse Approaches**

Noah Swann, Kiki Tang,<sup>∇</sup> Jihyeon Nam,<sup>∇</sup> Jooyeon Lee, Marek Domin, Thomas E. Shaw, Stosh  
A. Kozimor, Salina Som, Kangsang L. Lee\*

## Table of Contents

|                                                                                                                                                   |    |
|---------------------------------------------------------------------------------------------------------------------------------------------------|----|
| <b>1. General</b> .....                                                                                                                           | 3  |
| 1.1 Reagents.....                                                                                                                                 | 3  |
| <b>2. Synthesis and characterization of C-H silylation products</b> .....                                                                         | 4  |
| 2.1 Optimization of reaction conditions for Si-1 .....                                                                                            | 4  |
| 2.2 Optimization of reaction conditions for Si-2 .....                                                                                            | 9  |
| 2.3 Optimization of reaction conditions for Si-3 .....                                                                                            | 11 |
| 2.4 Portion-wise C—H silylation of arenes and heteroarenes with solvent and various siloxysilanes.....                                            | 15 |
| 2.5 Synthesis of [RhCl(Xyl-BINAP)] <sub>2</sub> (C4) .....                                                                                        | 16 |
| 2.6 Redistribution reaction in control experiment .....                                                                                           | 16 |
| 2.7 Representative procedure for Rh-catalyzed C—H silylation of arenes and heteroarenes with Si-1 (Procedure A1).....                             | 25 |
| 2.8 Representative procedure for portion-wise Rh-catalyzed C—H silylation of arenes and heteroarenes with Si-1 (Procedure A2).....                | 25 |
| 2.9 Representative procedure for portion-wise Rh-catalyzed C—H silylation of arenes and heteroarenes with Si-1 with solvent (Procedure A3).....   | 26 |
| 2.10 Representative procedure for Rh-catalyzed C—H silylation of arenes and heteroarenes with Si-2 (Procedure B1) .....                           | 30 |
| 2.11 Representative procedure for portion-wise Rh-catalyzed C—H silylation of arenes and heteroarenes with Si-2 (Procedure B2).....               | 31 |
| 2.12 Representative procedure for portion-wise Rh-catalyzed C—H silylation of arenes and heteroarenes with Si-2 with solvent (Procedure B3) ..... | 31 |
| 2.13 Representative procedure for Rh-catalyzed C—H silylation of arenes and heteroarenes with Si-3 (Procedure C1) .....                           | 36 |
| 2.14 Representative procedure for portion-wise Rh-catalyzed C—H silylation of arenes and heteroarenes with Si-3 (Procedure C2).....               | 36 |
| 2.15 Representative procedure for portion-wise Rh-catalyzed C—H silylation of arenes and heteroarenes with Si-3 with solvent (Procedure C3) ..... | 37 |
| 2.16 Representative procedure for Rh-catalyzed double C—H silylation with Si-2 (Procedure D) .....                                                | 40 |
| 2.17 Representative procedure for acceptorless Rh-catalyzed C—H silylation with Si-1 (Procedure E) .....                                          | 40 |
| <b>3. NMR spectra</b> .....                                                                                                                       | 42 |
| 3.1 C—H silylation products .....                                                                                                                 | 42 |
| 3.2 Rh complex .....                                                                                                                              | 83 |
| <b>4. Crystallographic data</b> .....                                                                                                             | 84 |
| <b>5. References</b> .....                                                                                                                        | 98 |

## 1. General

<sup>1</sup>H NMR spectra were recorded on a Bruker Avance III HD 400 (400 MHz) and Bruker Avance III 500 (500 MHz). Chemical shifts are reported in ppm with the solvent resonance as the internal standard (CDCl<sub>3</sub>: 7.26 ppm). Data are reported as follows: chemical shift, integration, multiplicity (s = singlet, d = doublet, t = triplet, q = quartet, p = pentet, sext = sextet, hept = heptet, m = multiplet, br = broad), and coupling constants (*J*, Hz). <sup>13</sup>C NMR spectra were recorded on a Bruker Avance III HD 400 (101 MHz) and Bruker Avance III 500 (126 MHz). Chemical shifts are reported in ppm with the solvent resonance as the internal standard (CDCl<sub>3</sub>: 77.16 ppm). <sup>29</sup>Si NMR spectra were recorded on a Bruker Avance III 500 (99 MHz). <sup>19</sup>F NMR spectra were recorded on a Bruker Avance III HD 400 (376 MHz) spectrometer without proton decoupling. <sup>31</sup>P NMR spectra were recorded on a Bruker Avance III HD 400 (162 MHz). High-resolution mass spectrometry was performed on a JEOL AccuTOF DART (positive mode). Unless otherwise noted, all reactions were carried out with distilled and degassed solvents under an atmosphere of dry N<sub>2</sub> in oven- (135 °C) or flame-dried glassware with standard dry box or vacuum-line techniques. Solvents were purified under a positive pressure of dry argon by a two-column solid-state purification system (JC Meyer Solvent System, Irvine, CA) and stored over activated 4 Å molecular sieves. CDCl<sub>3</sub> (Aldrich) was distilled and stored over activated 4 Å molecular sieves prior to use. 25mm 0.2 μm PTFE Syringe filters from VWR were used in workup procedures.

### 1.1 Reagents

[Rh(nbd)Cl]<sub>2</sub> was purchased from Strem and was used as received. (*S*)-(-)-XylBINAP was purchased from Ambeed and was used as received. [Rh(1,5-hexadiene)Cl]<sub>2</sub> was purchased from Aldrich and Ambeed and was used as received.

Tris(trimethylsiloxy)silane (Ambeed), 1,1,1,3,5,5,5-Heptamethyltrisiloxane (Aldrich), Pentamethyldisiloxane (Gelest), Cyclohexene (Aldrich), 2,3-Dimethyl-2-butene (Aldrich), Furan (Aldrich), 2-Methylfuran (Oakwood), *N*-Methylpyrrole (Oakwood), 1-Methylindole (Oakwood), Fluorobenzene (Oakwood), Chlorobenzene (Oakwood), 2-*tert*-Butylfuran (Ambeed), 2,3-Dimethylfuran (Ambeed), 2-Ethylfuran (Ambeed), Anisole (Aldrich), Benzofuran (Oakwood), Thiophene (Aldrich), Benzothiophene (Aldrich) *tert*-Butylbenzene (Aldrich), and Diphenylether (Ambeed) were distilled prior to use. Naphthalene (Oakwood) was recrystallized in ethanol.

## 2. Synthesis and characterization of C-H silylation products

### 2.1 Optimization of reaction conditions for Si-1

Table S1. Temperature screening

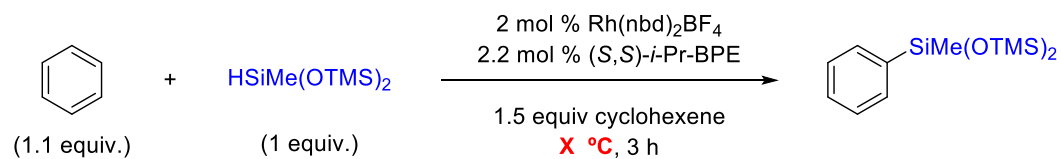

| entry | temperature | conv. |
|-------|-------------|-------|
| 1     | 22 °C       | 0%    |
| 2     | 40 °C       | 0%    |
| 3     | 60 °C       | 7%    |
| 4     | 80 °C       | 45%   |



Table S2. Ligand Screening

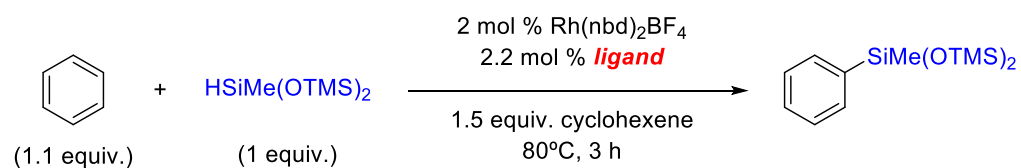

| entry | <i>ligand</i> | conv.                                     |
|-------|---------------|-------------------------------------------|
| 1     |               | R= Et ( <b>L1</b> ) <1%                   |
| 2     |               | R= Ph ( <b>L2</b> ) 0%                    |
| 3     |               | R= <i>i</i> -Pr ( <b>L2a</b> ) 3%         |
| 4     |               | R= Et ( <b>L2b</b> ) 21%                  |
| 5     |               | R = Ph (R) ( <b>L3</b> ) <1%              |
| 6     |               | R = 3,5-dimethyl-Ph (S) ( <b>L4</b> ) 11% |
| 7     |               | <b>L5</b> 0%                              |
| 8     |               | <b>L6</b> 0%                              |
| 9     |               | R= cyclohexyl ( <b>L7</b> ) 3%            |
| 10    |               | R= Ph ( <b>L7a</b> ) 0%                   |
| 11    |               | <b>L8</b> 0%                              |

Table S3. Rh salt screening

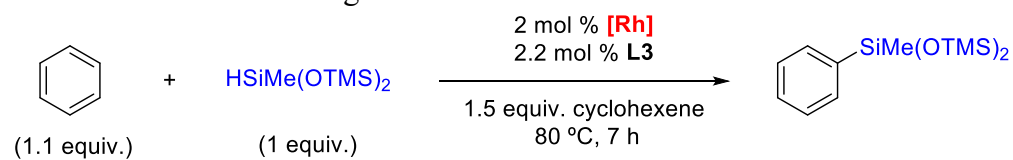

| entry | [Rh]                                        | conv.    | yield |
|-------|---------------------------------------------|----------|-------|
| 1     | Rh(nbd) <sub>2</sub> BF <sub>4</sub>        | 45% conv | 61%   |
| 2     | Rh(cod)BF <sub>4</sub>                      | 0% conv  | -     |
| 3     | [Rh(OMe)cod] <sub>2</sub>                   | 70% conv | 53%   |
| 4     | [RhCl(coe) <sub>2</sub> ] <sub>2</sub>      | 69% conv | 51%   |
| 5     | [RhCl(ethylene) <sub>2</sub> ] <sub>2</sub> | 75% conv | 57%   |
| 6     | [RhCl(CO) <sub>2</sub> ] <sub>2</sub>       | 0% conv  | -     |
| 7     | [RhCl(1,5-hexadiene)] <sub>2</sub>          | 66% conv | 54%   |
| 8     | [RhCl(nbd)] <sub>2</sub>                    | 42% conv | 32%   |

Table S4. Preformed catalyst screening

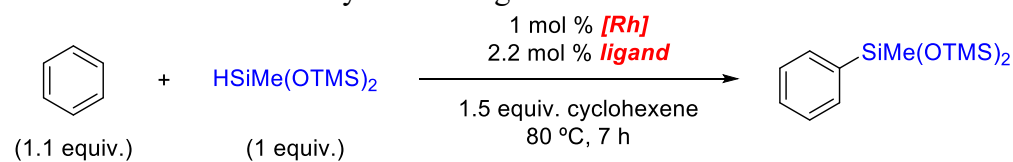

| entry | [Rh]                                 | ligand | conv. |
|-------|--------------------------------------|--------|-------|
| 1a    | Rh(nbd) <sub>2</sub> BF <sub>4</sub> | L3     | 74%   |
| 1b    |                                      | C1     | 5%    |
| ----- |                                      |        |       |
| 2a    | [RhCl(nbd)] <sub>2</sub>             | L3     | 42%   |
| 2b    |                                      | C2     | 67%   |
| ----- |                                      |        |       |
| 3a    | RhCl(coe) <sub>2</sub>               | L3     | 69%   |
| 3b    |                                      | C3     | 69%   |
| ----- |                                      |        |       |
| 4a    | [RhCl(ethylene)] <sub>2</sub>        | L3     | 75%   |
| 4b    |                                      | C4     | 75%   |
| ----- |                                      |        |       |
| 5a    | [RhCl(1,5-hexadiene)] <sub>2</sub>   | L3     | 66%   |
| 5b    |                                      | C5     | 83%   |

Table S5. Alkene screening

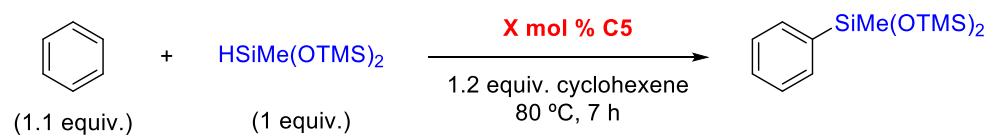

| entry | catalyst loading | conv.    |
|-------|------------------|----------|
| 1     | 0.25 mol %       | 69% conv |
| 2     | 0.5 mol %        | 74% conv |
| 3     | 1 mol %          | 68% conv |

Table S6. Alkene screening

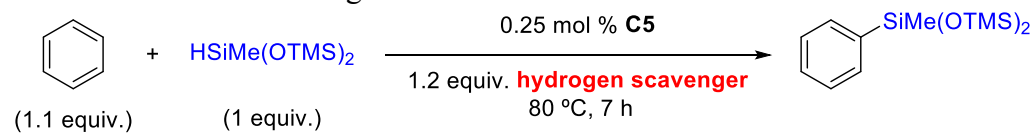

| entry | hydrogen scavenger                                                                | conv.    |
|-------|-----------------------------------------------------------------------------------|----------|
| 1     | No hydrogen scavenger                                                             | 9% conv  |
| 2     |  | 80% conv |
| 3     |  | 19% conv |

## 2.2 Optimization of reaction conditions for Si-2

Table S7. Ligand and rhodium salt screening

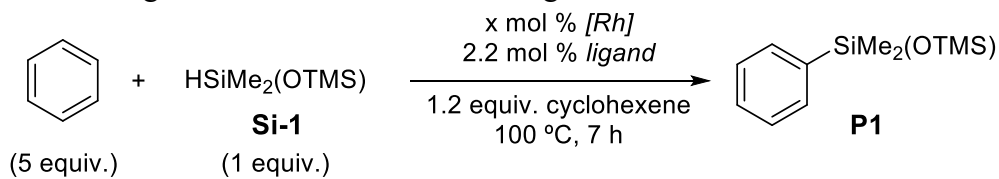

| entry | [Rh]                                        | ligand    | condition    | conv.; yield | Si-redistribution |
|-------|---------------------------------------------|-----------|--------------|--------------|-------------------|
| 1     | [Rh(1,5-hexadiene)Cl] <sub>2</sub>          | <b>L1</b> | 1 mol % [Rh] | <5%; -       | 54%               |
| 2     | [Rh(1,5-hexadiene)Cl] <sub>2</sub>          | <b>L2</b> | 1 mol % [Rh] | 72%; 55%     | 28%               |
| 3     | [Rh(1,5-hexadiene)Cl] <sub>2</sub>          | <b>L3</b> | 1 mol % [Rh] | 44%; -       | 18%               |
| 4     | [Rh(1,5-hexadiene)Cl] <sub>2</sub>          | <b>L4</b> | 1 mol % [Rh] | 74%; 57%     | 26%               |
| 5     | [Rh(nbd)Cl] <sub>2</sub>                    | <b>L4</b> | 1 mol % [Rh] | 81%; 53%     | 19%               |
| 6     | [Rh(coe) <sub>2</sub> Cl] <sub>2</sub>      | <b>L4</b> | 1 mol % [Rh] | 74%; 55%     | 26%               |
| 7     | [Rh(ethylene) <sub>2</sub> Cl] <sub>2</sub> | <b>L4</b> | 1 mol % [Rh] | 77%; 64%     | 23%               |
| 8     | Rh(nbd) <sub>2</sub> BF <sub>4</sub>        | <b>L4</b> | 2 mol % [Rh] | 48%; -       | 52%               |

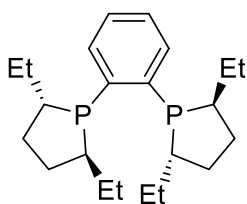

**L1**

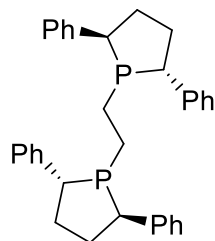

**L2**

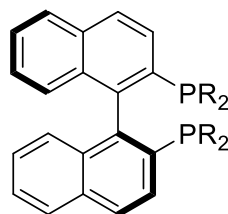

**L3:** R = Ph (*rac*)

**L4:** R = 3,5-dimethyl-Ph (*S*)

Table S8. Preformed complex screening

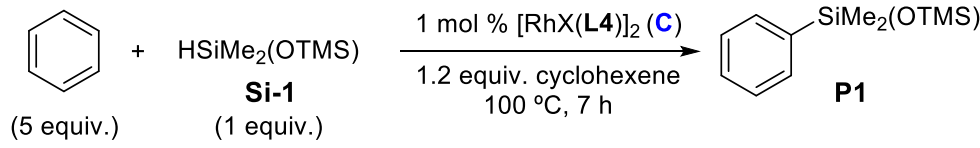

| entry | [Rh] / L                                         | preformed catalyst | conv. | Si-redistribution |
|-------|--------------------------------------------------|--------------------|-------|-------------------|
| 1     | [Rh(nbd)Cl] <sub>2</sub> / L4                    | <b>C1</b>          | 79%   | 21%               |
| 2     | [Rh(coe) <sub>2</sub> Cl] <sub>2</sub> / L4      | <b>C2</b>          | 78%   | 22%               |
| 3     | [Rh(ethylene) <sub>2</sub> Cl] <sub>2</sub> / L4 | <b>C3</b>          | 82%   | 18%               |
| 4     | [Rh(1,5-hexadiene)Cl] <sub>2</sub> / L4          | <b>C4</b>          | 93%   | 7%                |

Table S9. Temperature screening

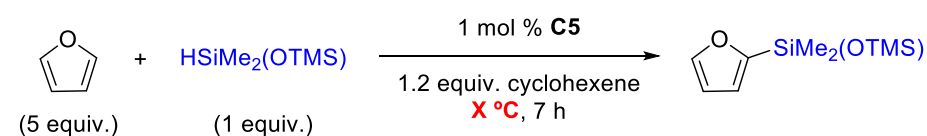

| entry | temperature | conv. |
|-------|-------------|-------|
| 1     | 80 °C       | 65%   |
| 2     | 100 °C      | 71%   |
| 3     | 120 °C      | 66%   |

Table S10. Arene equivalence screening

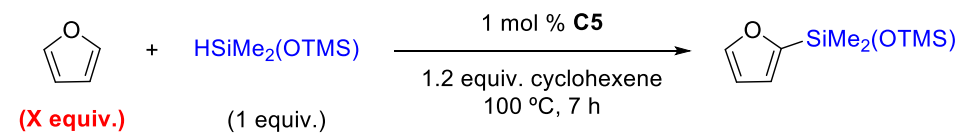

| entry | arene equivalence | conv. |
|-------|-------------------|-------|
| 1     | 5                 | 66%   |
| 2     | 7                 | 58%   |
| 3     | 10                | 58%   |
| 4     | 13.8              | 71%   |

Table S11. Catalyst loading screening

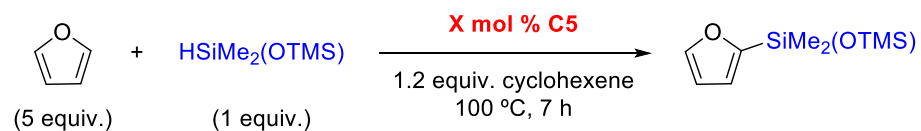

| entry | catalyst loading | conv. |
|-------|------------------|-------|
| 1     | 1 mol %          | 71%   |
| 2     | 1.25 mol %       | 72%   |
| 3     | 1.5 mol %        | 73%   |
| 4     | 1.75 mol %       | 71%   |

### 2.3 Optimization of reaction conditions for Si-3

Table S12. Temperature screening

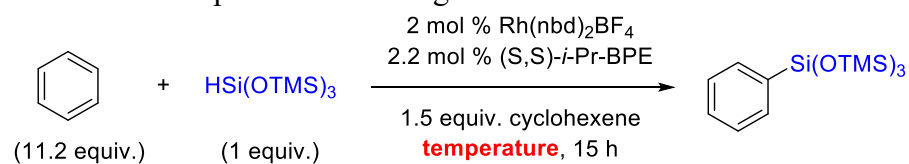

| entry | temperature | conv. | yield |
|-------|-------------|-------|-------|
| 1     | 22 °C       | <1%   | -     |
| 2     | 40 °C       | <1%   | -     |
| 3     | 60 °C       | <1%   | -     |
| 4     | 80 °C       | 7%    | -     |
| 5     | 100 °C      | 37%   | 30%   |
| 6     | 120 °C      | 59%   | 59%   |

Table S13. Ligand Screening

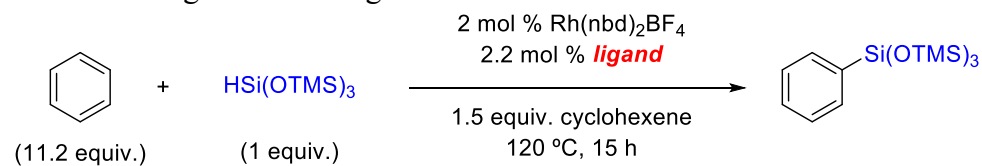

| entry | ligand | conv.                                                 |
|-------|--------|-------------------------------------------------------|
| 1     |        | R= Et ( <b>L1</b> )<br>8%                             |
| 2     |        | R= Ph ( <b>L2</b> )<br><1%                            |
| 3     |        | R= <i>i</i> -Pr ( <b>L2a</b> )<br>94%                 |
| 4     |        | R= Et ( <b>L2b</b> )<br>31%                           |
| 5     |        | R = Ph ( <i>R</i> ) ( <b>L3</b> )<br>7%               |
| 6     |        | R = 3,5-dimethyl-Ph ( <i>S</i> ) ( <b>L4</b> )<br>52% |
| 7     |        | <b>L5</b><br><1%                                      |
| 8     |        | <b>L6</b><br><1%                                      |
| 9     |        | R= cyclohexyl ( <b>L7</b> )<br>15%                    |
| 10    |        | R= Ph ( <b>L7a</b> )<br><1%                           |
| 11    |        | <b>L8</b><br><1%                                      |

(*S*)-(-)-XylBINAP (\$76/ mmol)  
(*S,S*)-*i*-Pr-BPE (\$295.7/ mmol)



Table S14. Rh salt screening

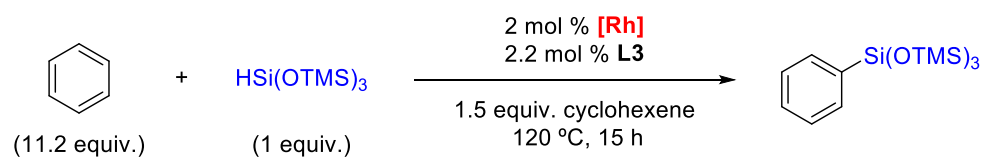

| entry | [Rh]                                        | conv. | yield |
|-------|---------------------------------------------|-------|-------|
| 1     | Rh(nbd) <sub>2</sub> BF <sub>4</sub>        | 63%   | 61%   |
| 2     | Rh(cod) <sub>2</sub> BF <sub>4</sub>        | 6%    | -     |
| 3     | Rh(cod) <sub>2</sub> OTf                    | 7%    | -     |
| 4     | [RhCl(coe) <sub>2</sub> ] <sub>2</sub>      | 41%   | 31%   |
| 5     | [RhCl(ethylene) <sub>2</sub> ] <sub>2</sub> | 33%   | 31%   |
| 6     | [RhCl(CO) <sub>2</sub> ] <sub>2</sub>       | 0%    | -     |
| 7     | [RhCl(1,5-hexadiene)] <sub>2</sub>          | 28%   | 22%   |
| 8     | [RhCl(nbd)] <sub>2</sub>                    | 42%   | 32%   |

Table S15. Preformed catalyst screening

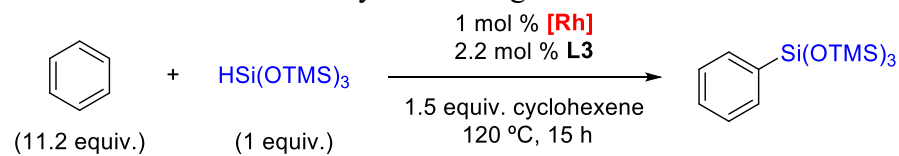

| entry | [Rh]                                        | ligand | conv. | yield |
|-------|---------------------------------------------|--------|-------|-------|
| 1a    | Rh(nbd) <sub>2</sub> BF <sub>4</sub>        | L3     | 41%   | 31%   |
| 1b    | C1                                          |        | 8%    | -     |
| ----- |                                             |        |       |       |
| 2a    | [RhCl(nbd)] <sub>2</sub>                    | L3     | 42%   | 32%   |
| 2b    | C2                                          |        | 18%   | -     |
| ----- |                                             |        |       |       |
| 3a    | RhCl(coe) <sub>2</sub>                      | L3     | 58%   | 58%   |
| 3b    | C3                                          |        | <1%   | -     |
| ----- |                                             |        |       |       |
| 4a    | [RhCl(ethylene) <sub>2</sub> ] <sub>2</sub> | L3     | 33%   | 31%   |
| 4b    | C4                                          |        | 24%   | 23%   |

Table S16. Alkene screening

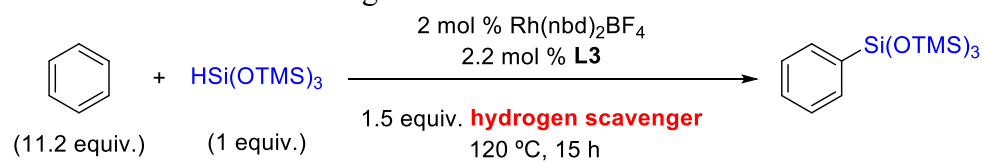

| entry | hydrogen scavenger    | conv. | yield |
|-------|-----------------------|-------|-------|
| 1     | No hydrogen scavenger | 14%   | -     |
| 2     |                       | 58%   | 58%   |
| 3     |                       | 12%   | -     |
| 4     |                       | 70%   | 69%   |
| 5     |                       | 19%   | -     |
| 6     |                       | 49%   | 24%   |

Table S17. Ligand loading screening

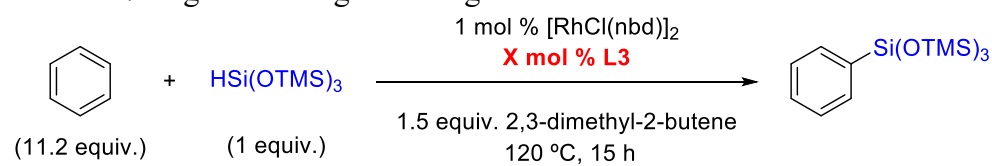

| entry | ligand loading | conv. | yield |
|-------|----------------|-------|-------|
| 1     | 1 mol %        | 93%   | 92%   |
| 2     | 2 mol %        | 95%   | 92%   |
| 3     | 2.2 mol %      | 92%   | 71%   |
| 4     | 3.5 mol %      | 81%   | 78%   |

## 2.4 Portion-wise C—H silylation of arenes and heteroarenes with solvent and various siloxysilanes

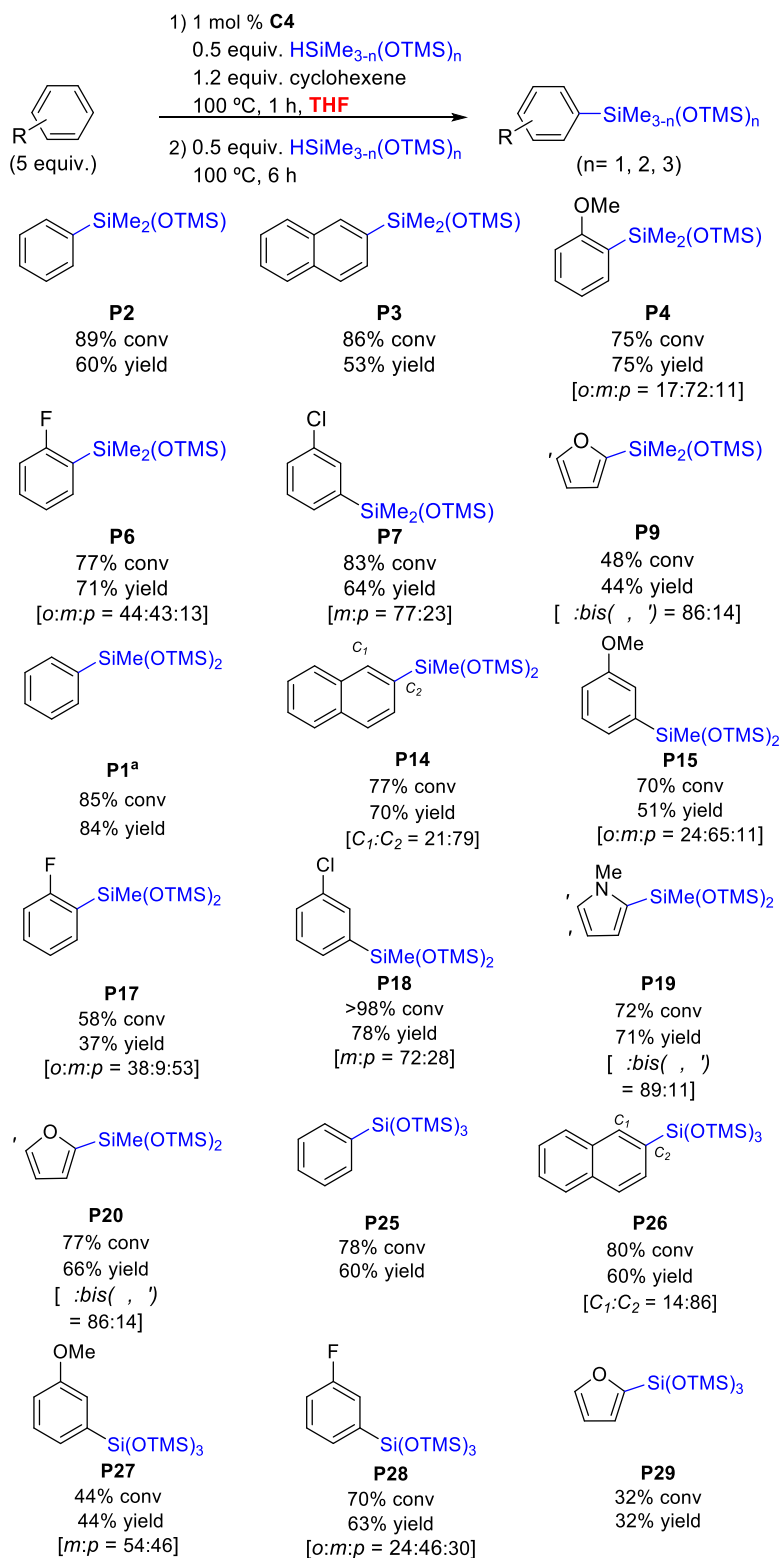

## 2.5 Synthesis of [RhCl(Xyl-BINAP)]<sub>2</sub> (C4)

In a N<sub>2</sub>-filled glovebox, an oven-dried vial was charged with [Rh(1,5-hexadiene)Cl]<sub>2</sub> (112.8 mg, 0.26 mmol, 1 equiv.), (*S*)-(-)-XylBINAP (400 mg, 0.54 mmol, 2.1 equiv.), and THF (4 ml). After 20 h of stirring at 22 °C, a dark brown solution was obtained. Solvent was removed by evaporation and rinsed with *n*-hexanes. Brown solid form of [RhCl(XylBINAP)]<sub>2</sub> (C4) was obtained after evaporation. The resulting solid was collected by filtration and washed with cold *n*-hexanes (95% isolated yield). <sup>1</sup>H NMR (400 MHz, CDCl<sub>3</sub>) δ 7.42 (d, *J* = 7.9 Hz, 2H), 7.33 (s, 10H), 7.09 (q, *J* = 7.1 Hz, 4H), 6.82 (t, *J* = 7.7 Hz, 2H), 6.61 (s, 4H), 6.42 (d, *J* = 8.6 Hz, 2H), 6.05 (s, 3H), 2.27 (t, *J* = 12.1 Hz, 3H), 2.12 (d, *J* = 7.4 Hz, 3H), 2.04 (s, 2H), 1.91 (s, 2H), 1.62 (s, 2H), 1.15 (d, *J* = 22.2 Hz, 5H), 0.79 (t, *J* = 6.7 Hz, 2H). <sup>31</sup>P NMR (162 MHz, CDCl<sub>3</sub>) δ 48.71 (d, *J* = 194.5, 200.0 Hz). X-ray data is shown at the end of SI.

## 2.6 Redistribution reaction in control experiment

### Redistribution control experiment with Si-1

In a N<sub>2</sub>-filled glovebox, an oven-dried pressure tube was charged with [RhCl(XylBINAP)]<sub>2</sub> (C4, 17.5 mg, 1 mol %), (*S*)-(-)-XylBINAP (7.3 mg, 1 mol %), or [Rh(1,5-hexadiene)Cl]<sub>2</sub> (8.7 mg, 1 mol %) and Si-1 (148.4 mg, 1 mmol). After stirring for 7 h at 100 °C, the reaction mixture was cooled to 22 °C. Conversion to redistribution byproducts were monitored by <sup>1</sup>H NMR and <sup>29</sup>Si NMR. Note that due to the high volatility of some expected byproducts, the percentile of the observed redistribution is an approximate value based on <sup>1</sup>H NMR analysis.

Table S18. Redistribution control experiment of Si-1

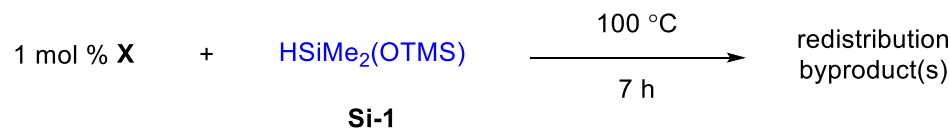

|                                    | hydrosilane redistribution |     |     |
|------------------------------------|----------------------------|-----|-----|
|                                    | 0.5 h                      | 3 h | 7 h |
| Si-1                               | <5%                        | <5% | <5% |
| [Rh(1,5-hexadiene)Cl] <sub>2</sub> | 6%                         | 55% | 67% |
| L4                                 | <5%                        | <5% | <5% |
| C4                                 | <5%                        | <5% | <5% |

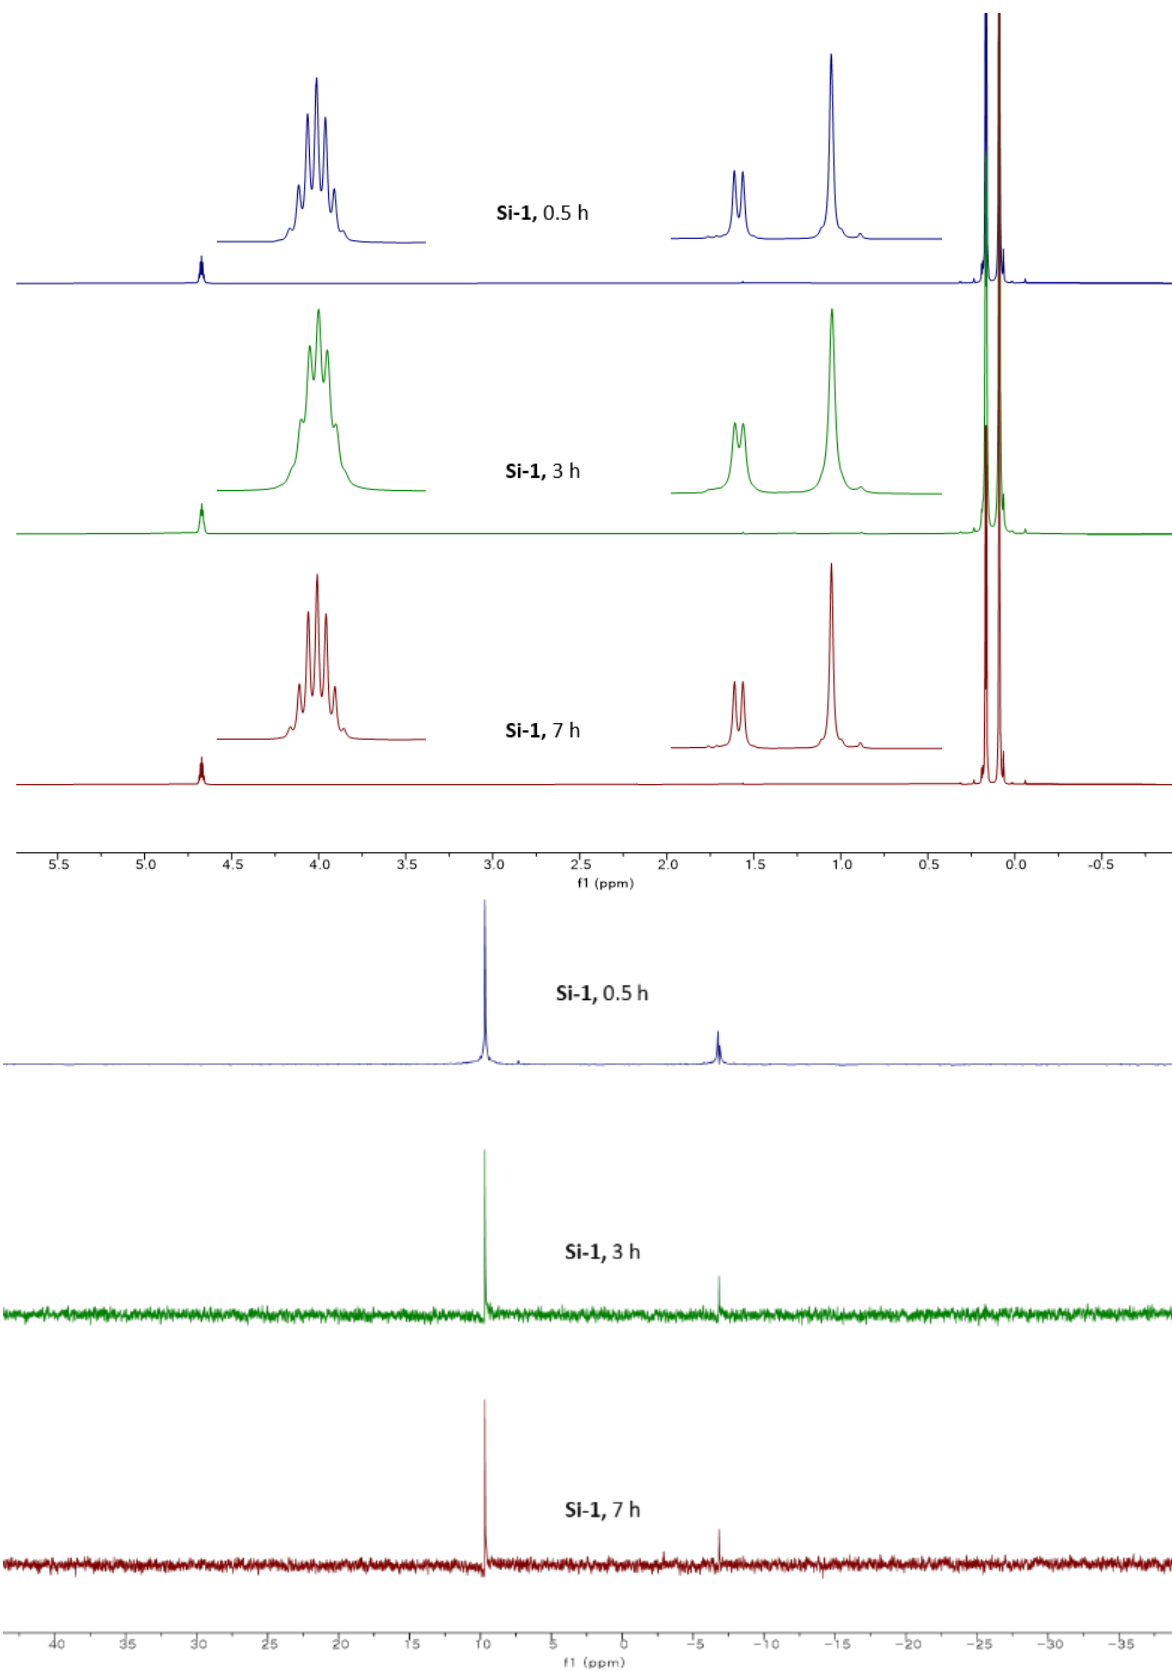

Figure S1.  $^1\text{H}$  and  $^{29}\text{Si}$  spectra of Si-1 redistribution.

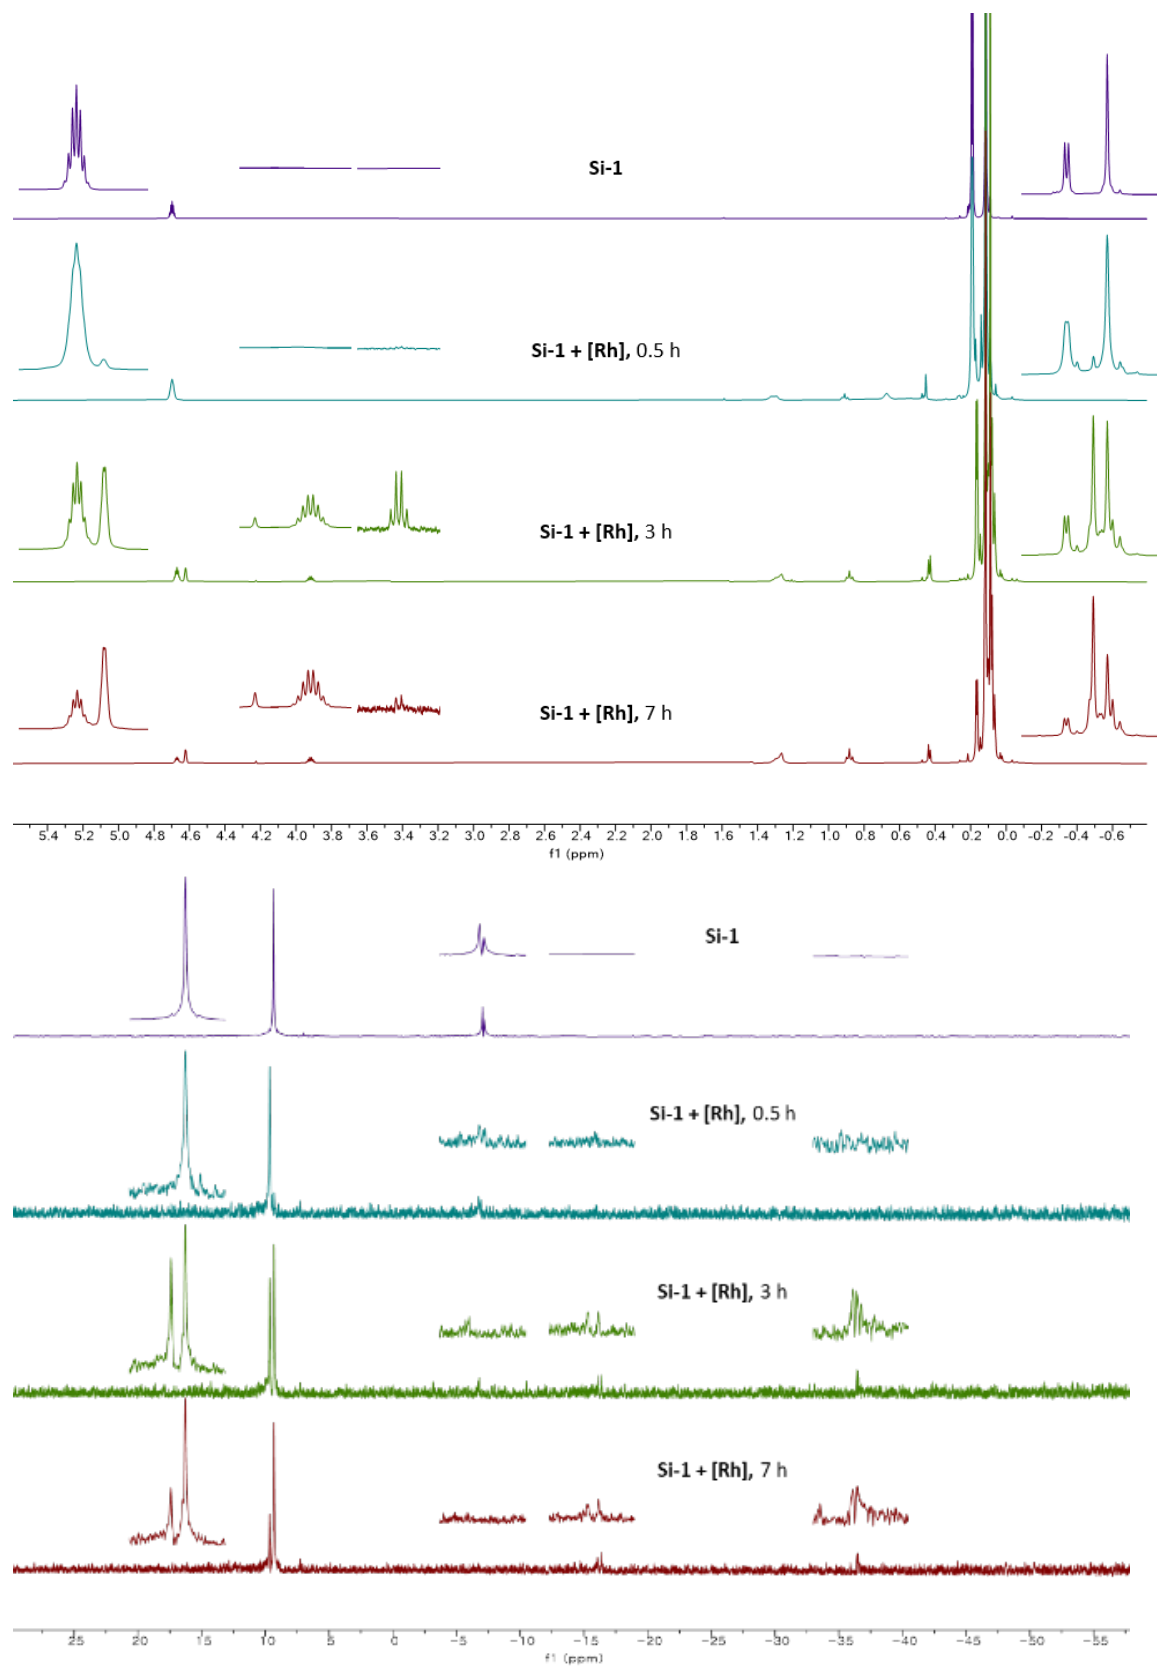

Figure S2.  $^1\text{H}$  and  $^{29}\text{Si}$  spectra of Si-1 redistribution tendency with  $[\text{Rh}(1,5\text{-hexadiene})\text{Cl}]_2$ .

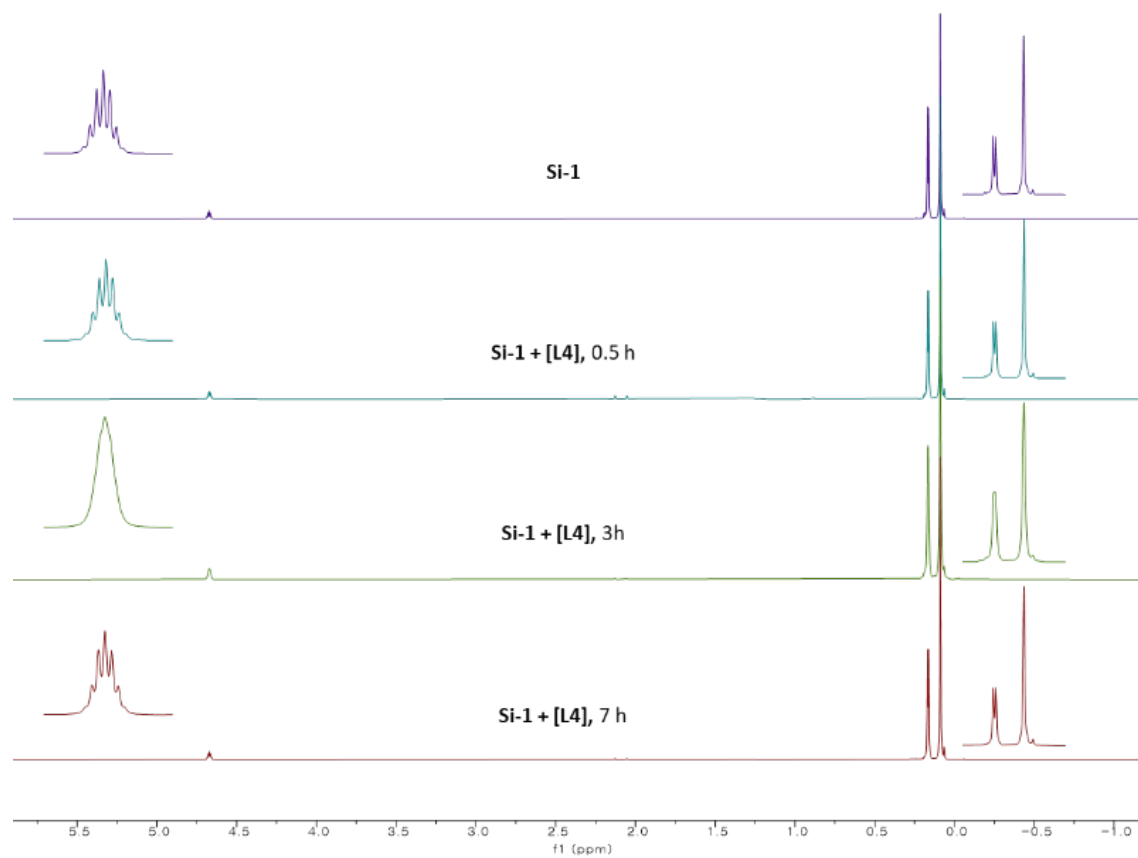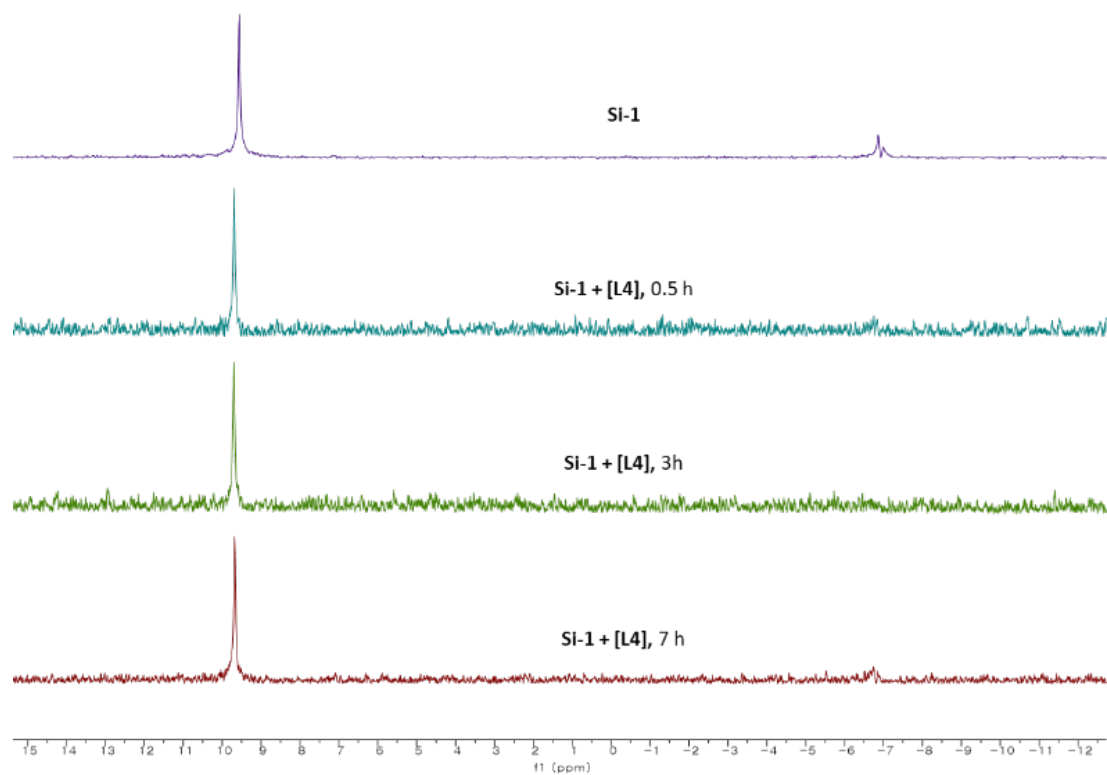

Figure S3.  $^1\text{H}$  and  $^{29}\text{Si}$  spectra of Si-1 redistribution tendency with L4.

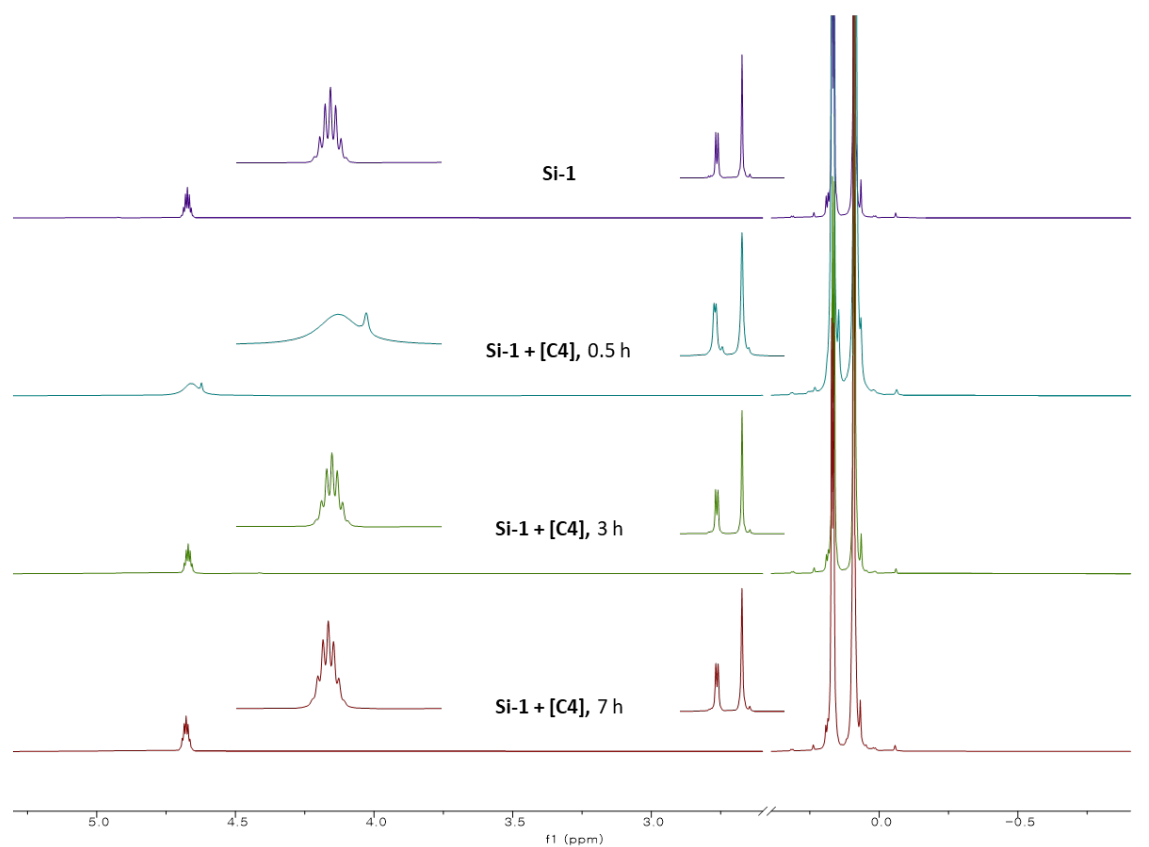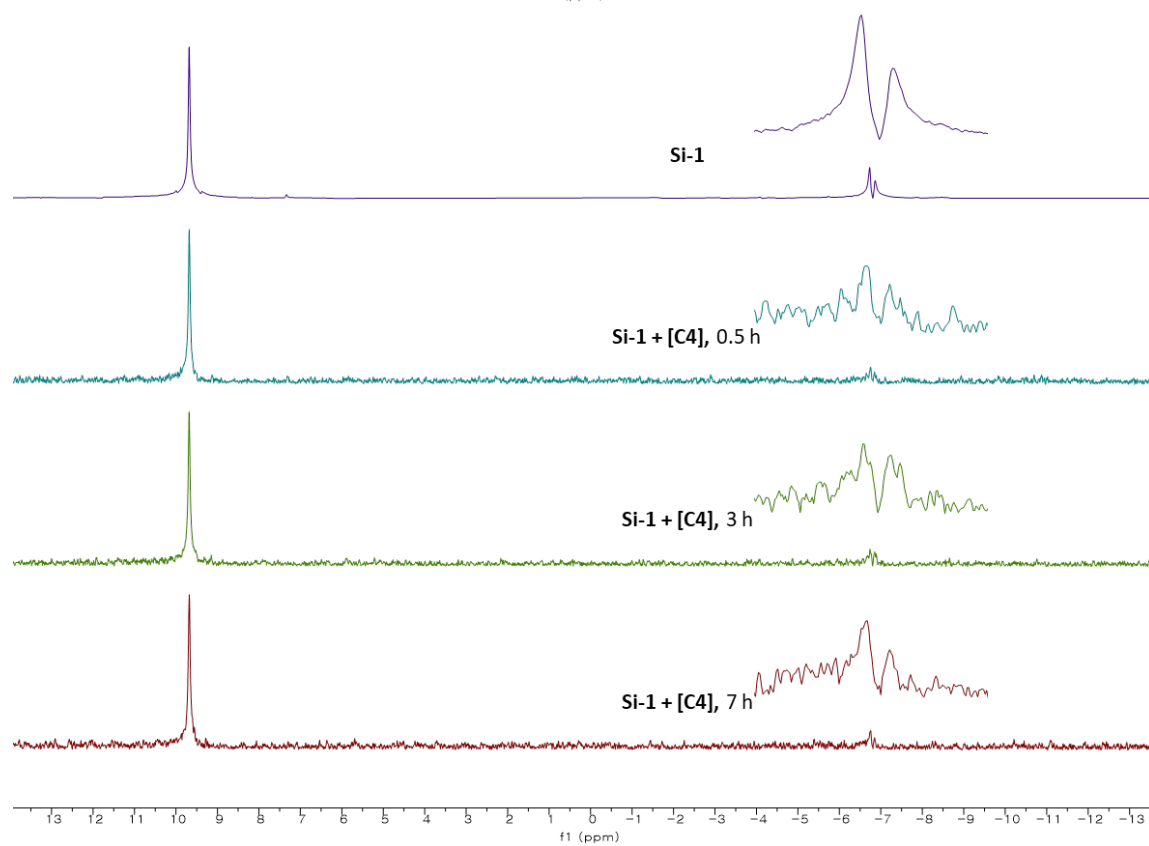

Figure S4.  $^1\text{H}$  and  $^{29}\text{Si}$  spectra of Si-1 redistribution tendency with C4.



### Redistribution control experiment with Si-2

In a N<sub>2</sub>-filled glovebox, an oven-dried pressure tube was charged with [RhCl(XylBINAP)]<sub>2</sub> (**C4**, 17.5 mg, 1 mol %), (*S*)-(-)-XylBINAP (7.3 mg, 1 mol %), or [Rh(1,5-hexadiene)Cl]<sub>2</sub> (8.7mg, 1 mol %) and **Si-2** (222.5 mg, 1 mmol). After stirring for 7 h at 80 °C, the reaction mixture was cooled to 22 °C. Conversion to redistribution byproducts were monitored by <sup>1</sup>H NMR. Note that due to the high volatility of some expected byproducts, the percentile of the observed redistribution is an approximate value based on <sup>1</sup>H NMR analysis.

Table S19. Redistribution control experiment of **Si-2**

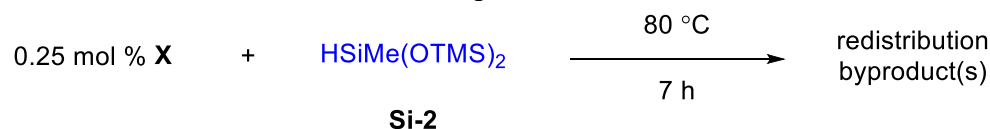

|                                          | hydrosilane redistribution |     |     |
|------------------------------------------|----------------------------|-----|-----|
|                                          | 0.5 h                      | 1 h | 7 h |
| <b>Si-2</b>                              | <5%                        | <5% | <5% |
| <b>[Rh(1,5-hexadiene)Cl]<sub>2</sub></b> | 6%                         | 8%  | 21% |
| <b>L4</b>                                | <5%                        | <5% | <5% |
| <b>C4</b>                                | <5%                        | <5% | 8%  |

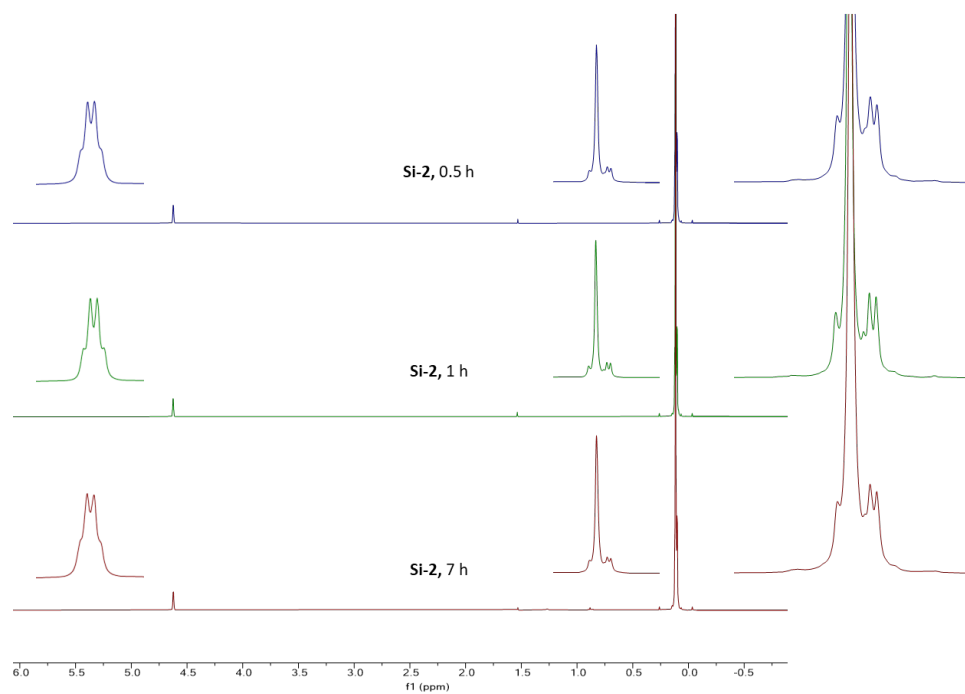

Figure S5.  $^1\text{H}$  spectra of Si-2 redistribution.

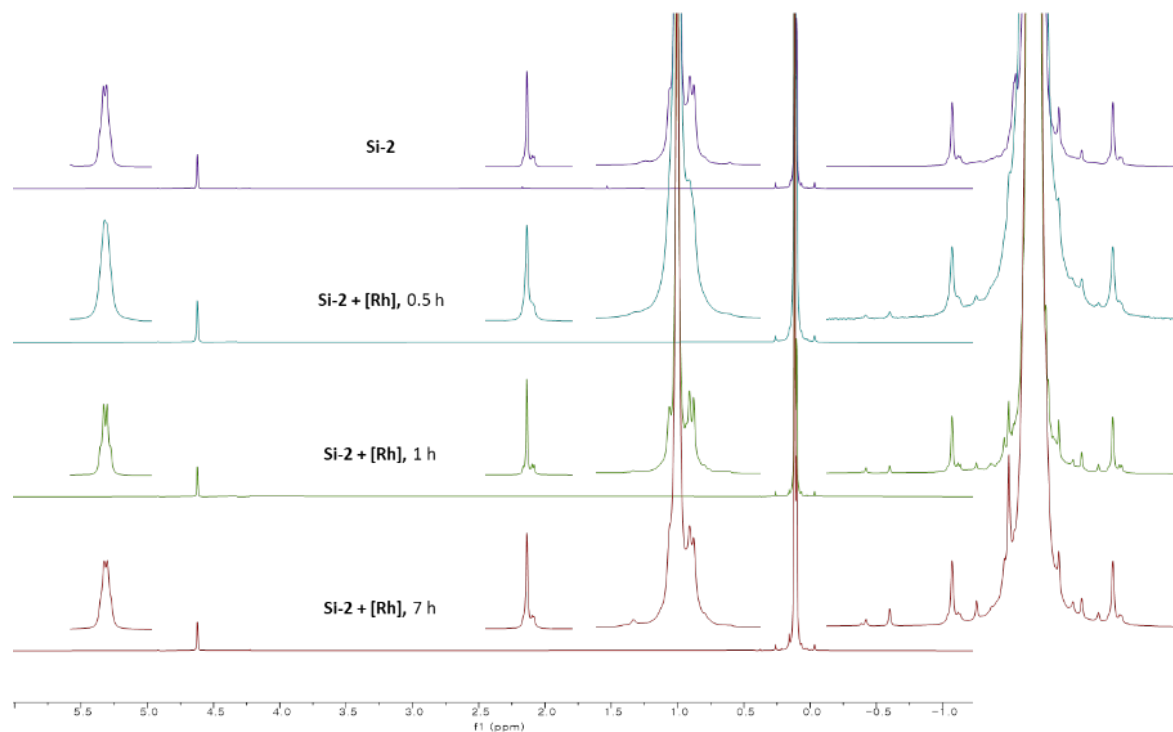

Figure S6.  $^1\text{H}$  spectra of Si-2 redistribution tendency with  $[\text{Rh}(1,5\text{-hexadiene})\text{Cl}]_2$ .

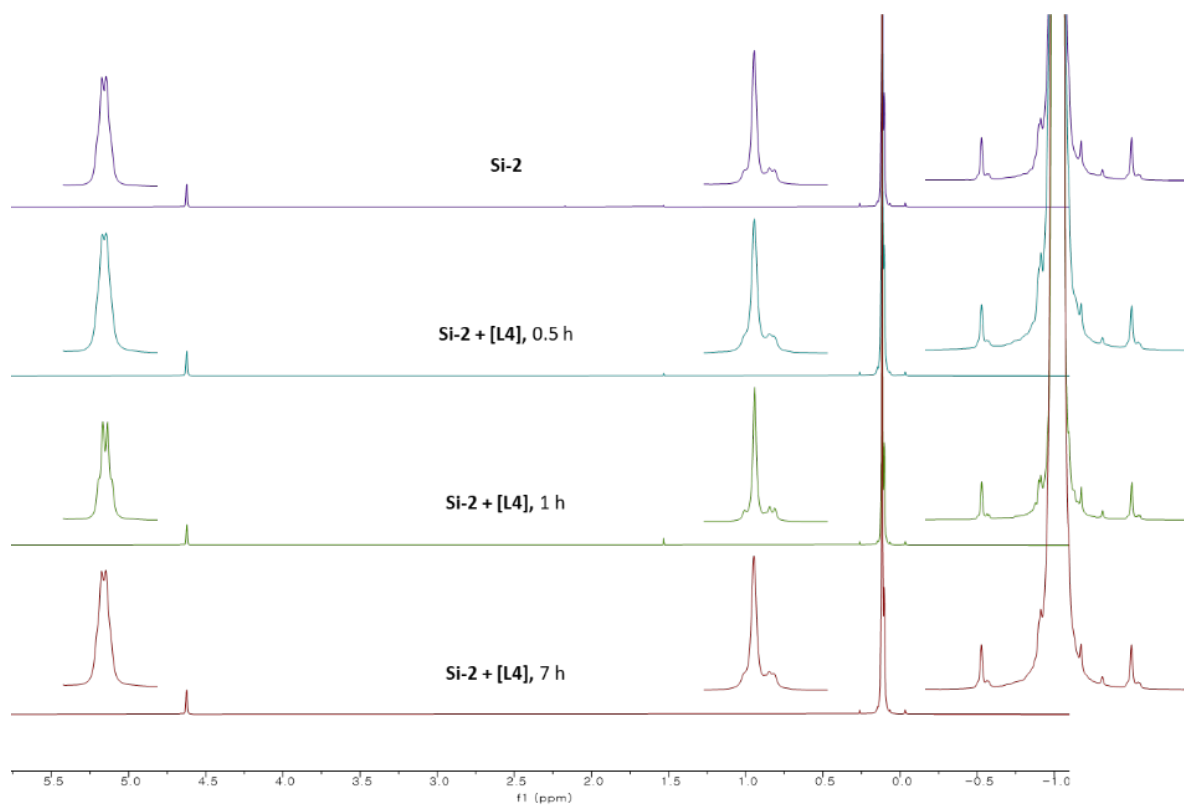

Figure S7.  $^1\text{H}$  spectra of Si-2 redistribution tendency with L4.

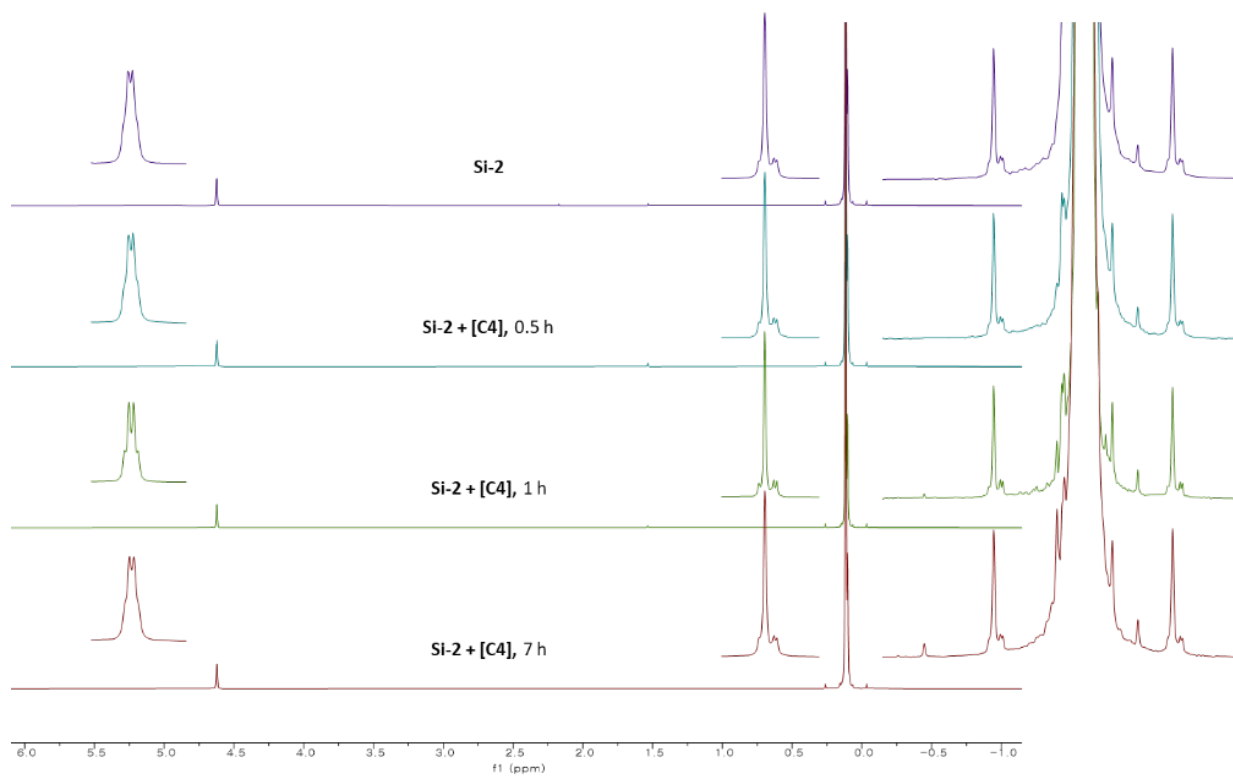

Figure S8.  $^1\text{H}$  spectra of Si-2 redistribution tendency with C4.

### Redistribution control experiment with Si-3

In a N<sub>2</sub>-filled glovebox, an oven-dried pressure tube was charged with [Rh(nbd)Cl]<sub>2</sub> (4.6 mg, 1 mol %) and Si-3 (296.7 mg, 1 mmol). After stirring for 15 h at 120 °C, the reaction mixture was cooled to 22 °C. Conversion to redistribution byproducts were monitored by <sup>1</sup>H NMR. Note that due to the high volatility of some expected byproducts, the percentile of the observed redistribution is an approximate value based on <sup>1</sup>H NMR analysis.

Table S20. Redistribution control experiment of Si-3

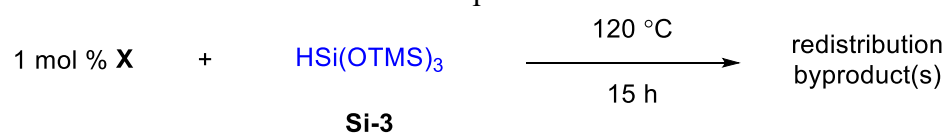

#### hydrosilane redistribution

|                                | 0.5 h | 1 h | 5 h | 15 h |
|--------------------------------|-------|-----|-----|------|
| <b>Si-3</b>                    | <5%   | <5% | <5% | <5%  |
| <b>[Rh(nbd)Cl]<sub>2</sub></b> | <5%   | 9%  | 10% | 13%  |

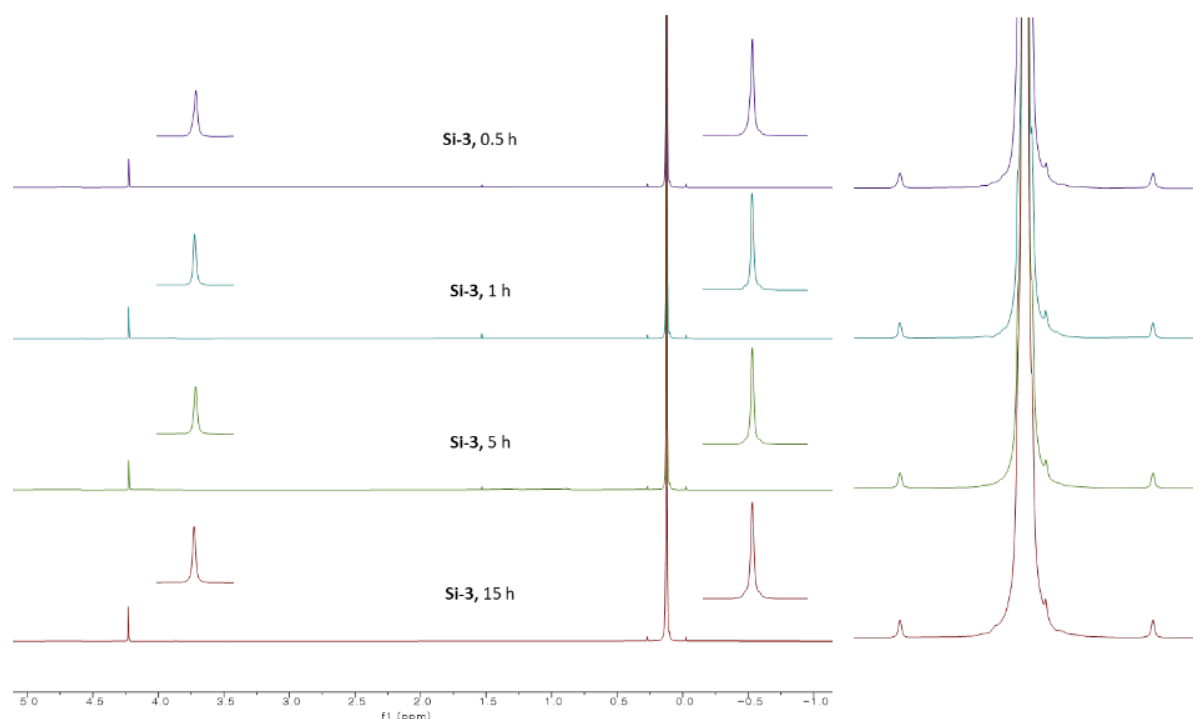

Figure S9. <sup>1</sup>H spectra of Si-3 redistribution.

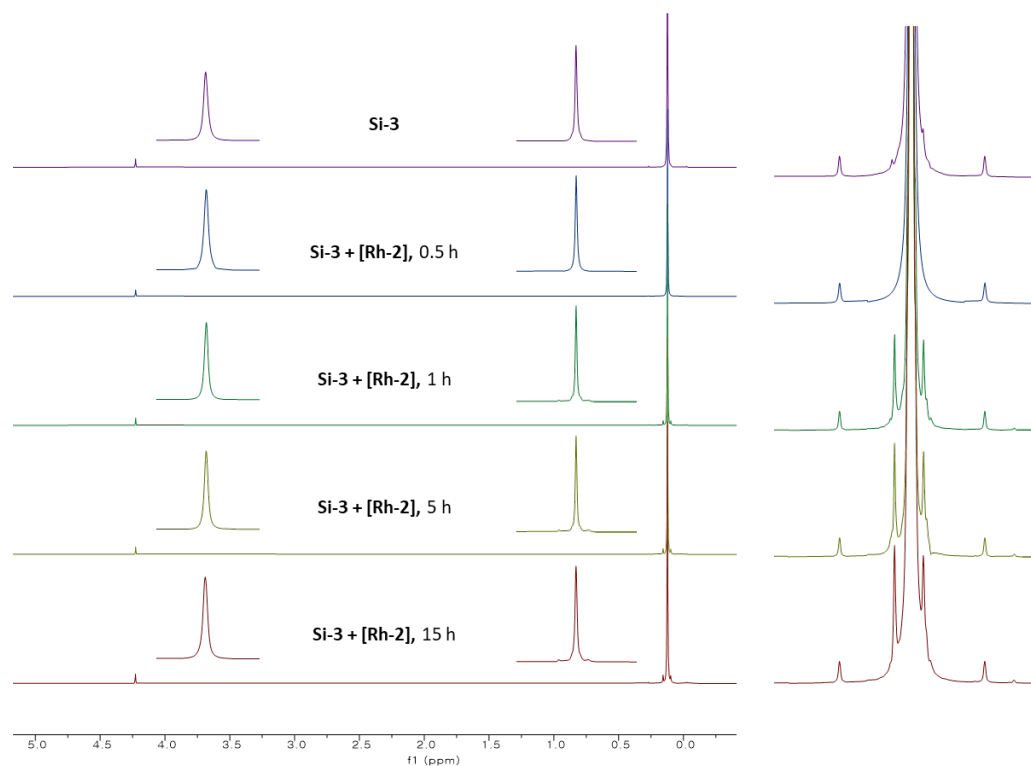

Figure S10.  $^1\text{H}$  spectra of **Si-3** redistribution tendency with  $[\text{Rh}(\text{nbd})\text{Cl}]_2$ .

### 2.7 Representative procedure for Rh-catalyzed C—H silylation of arenes and heteroarenes with **Si-1** (Procedure A1)

In a  $\text{N}_2$ -filled glovebox, an oven-dried pressure tube was charged with **C4** (8.7 mg, 1 mol %) and benzene (195.3 mg, 5 equiv.). The reaction was allowed to stir for 10 minutes at 22 °C. To the mixture, **Si-1** (74.2 mg, 0.5 equiv.) and cyclohexene (49.3 mg, 1.2 equiv.) were added. The reaction mixture was allowed to stir for 7 h at 100 °C (93% conv., 71% yield by  $^1\text{H}$  NMR analysis).

Isolated yield was obtained after the following workup procedure was done outside the glovebox. Evaporation of the crude mixture, diluting the residue with *n*-hexanes, and filtration through a syringe filter by rinsing with *n*-hexanes was done. The filtrate was then purified by silica gel chromatography affording the desired product (**P1**) as a colorless liquid [71% isolated yield (80 mg)]

### 2.8 Representative procedure for portion-wise Rh-catalyzed C—H silylation of arenes and heteroarenes with **Si-1** (Procedure A2)

In a  $\text{N}_2$ -filled glovebox, an oven-dried pressure tube was charged with **C4** (8.7 mg, 1 mol %) and benzene (195.3 mg, 5 equiv.). The reaction was allowed to stir for 10 minutes at 22 °C. To the mixture, **Si-1** (37.1 mg, 0.5 equiv.) and cyclohexene (49.3 mg, 1.2 equiv.) were added. The reaction mixture was allowed to stir for 1 h at 100 °C. To the mixture, **Si-1** (37.1 mg, 0.5 equiv.) was added and allowed to stir for 6 h at 100 °C (95% conv., 85% yield by  $^1\text{H}$  NMR analysis).

Isolated yield was obtained after the following workup procedure was done outside the glovebox. Evaporation of the crude mixture, diluting the residue with *n*-hexanes, and filtration through a

syringe filter by rinsing with *n*-hexanes was done. The filtrate was then purified by silica gel chromatography affording the desired product (**P1**) as a colorless liquid [85% isolated yield (95 mg)].

### 2.9 Representative procedure for portion-wise Rh-catalyzed C—H silylation of arenes and heteroarenes with Si-1 with solvent (Procedure A3)

In a N<sub>2</sub>- filled glovebox, an oven-dried pressure tube was charged with C4 (8.7 mg, 1 mol %) and benzene (195.3 mg, 5 equiv.). The reaction was allowed to stir for 10 minutes at 22 °C. To the mixture, Si-1 (37.1 mg, 0.5 equiv.), cyclohexene (49.3 mg, 1.2 equiv.) and THF (328.9 mg, 1.35 M) were added. The reaction mixture was allowed to stir for 1 h at 100 °C. To the mixture, Si-1 (37.1 mg, 0.5 equiv.) was added and allowed to stir for 6 h at 100 °C (89% conv., 60% yield by <sup>1</sup>H NMR analysis).

Isolated yield was obtained after the following workup procedure was done outside the glovebox. Evaporation of the crude mixture, diluting the residue with *n*-hexanes, and filtration through a syringe filter by rinsing with *n*-hexanes was done. The filtrate was then purified by silica gel chromatography affording the desired product (**P1**) as a colorless liquid [60% isolated yield (67 mg)].

#### 1,1,1,3,3-Pentamethyl-3-phenyldisiloxane (**P1**)

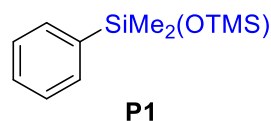

Procedure A1: 93% conv., 71% isolated yield (80 mg)

Procedure A2: 95% conv., 85% isolated yield (95 mg)

Procedure A3: 89% conv., 60% isolated yield (67 mg)

Procedure E: 32% conv.

<sup>1</sup>H NMR (400 MHz, CDCl<sub>3</sub>) δ 7.64 – 7.61 (m, 2H), 7.43 (dd, *J* = 4.8, 1.8 Hz, 3H), 0.40 (s, 6H), 0.17 (s, 9H). Spectroscopic data were consistent with those previously reported.<sup>1</sup>

#### 1,1,1,3,3-Pentamethyl-3-(naphthalen-2-yl)disiloxane (**P2**)

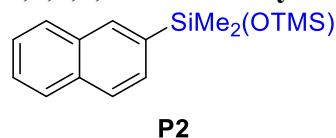

Procedure A1: 53% conv., 41% isolated yield (56 mg)

Procedure A2: 58% conv., 46% isolated yield (63 mg)

Procedure A3: 86% conv., 53% isolated yield (73 mg)

<sup>1</sup>NMR (400 MHz, CDCl<sub>3</sub>) δ 8.15 (s, 1H), 7.98 – 7.88 (m, 3H), 7.74 (dd, *J* = 8.1, 1.2 Hz, 1H), 7.57 (dd, *J* = 6.2, 3.3 Hz, 2H), 0.52 (s, 6H), 0.23 (s, 9H). <sup>13</sup>C NMR (101 MHz, CDCl<sub>3</sub>) δ 135.57, 131.85,

131.61, 130.86, 127.36, 126.18, 125.69, 124.90, 124.29, 123.80, 0.00, -1.07. HRMS (EI+) calcd for  $[C_{15}H_{23}OSi_2]^+$   $[M+H]^+$ : 275.1282, found: 275.12761.

### 1-(2-methoxyphenyl)-1,1,3,3,3-pentamethyldisiloxane and regioisomers (P3)

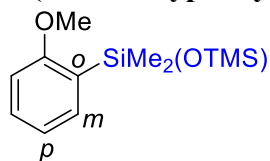

**P3**

Procedure A1: 57% conv., 55% isolated yield (70 mg) [*o*:*m*:*p* = 24:61:15]

Procedure A2: 75% conv., 60% isolated yield (76 mg) [*o*:*m*:*p* = 23:61:16]

Procedure A3: 75% conv., 75% isolated yield (95 mg) [*o*:*m*:*p* = 17:72:11]

<sup>1</sup>H NMR (400 MHz, CDCl<sub>3</sub>) δ 7.52 – 7.47 (m, 1H), 7.37 (ddd, *J* = 8.4, 7.4, 1.8 Hz, 0.26H), 7.32 (dd, *J* = 8.2, 7.2 Hz, 1.16H), 7.14 (dt, *J* = 7.1, 1.0 Hz, 1.16H), 7.12 – 7.10 (m, 1.14H), 7.01 – 6.96 (m, 0.31H), 6.93 (ddd, *J* = 8.2, 2.7, 0.9 Hz, 1.78H), 6.83 (d, *J* = 8.2 Hz, 0.26H), 3.84 (s, 3H), 3.83 (s, 1H), 3.80 (s, 0.73H), 0.33 (s, 8.47H), 0.32 (s, 2.06H), 0.13 – 0.12 (m, 3.64H), 0.11 (s, 9.14H), 0.10 (s, 3.01H). <sup>13</sup>C NMR (101 MHz, CDCl<sub>3</sub>) δ 164.01, 160.66, 159.07, 142.01, 135.18, 134.64, 131.43, 131.12, 129.08, 127.86, 125.38, 120.53, 119.16, 118.52, 114.65, 113.54, 109.54, 55.21, 55.14, 54.99, 2.12, 1.53, 1.14, 1.04. HRMS (EI+) calcd for  $[C_{14}H_{32}O_4Si_4]^+$   $[M+H]^+$ : 275.1282, found: 275.12761.

### 1-(3-*tert*-Butylphenyl)-1,1,3,3,3-pentamethyldisiloxane and regioisomer (P4)

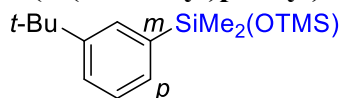

**P4** [*m*:*p* = 66:34]

Procedure A1: 59% conv., 48% isolated yield (67 mg) [*m*:*p* = 66:34]

<sup>1</sup>H NMR (400 MHz, CDCl<sub>3</sub>) δ 7.65 – 7.62 (m, 1H), 7.52 (dd, *J* = 8.1, 1.7 Hz, 1.05H), 7.47 – 7.40 (m, 2.06H), 7.38 (dq, *J* = 7.2, 1.3 Hz, 1.01H), 7.36 – 7.30 (m, 1.02H), 1.37 (d, *J* = 1.6 Hz, 9H), 1.36 (d, *J* = 1.5 Hz, 3.7H), 0.35 (d, *J* = 1.6 Hz, 6.19H), 0.34 (d, *J* = 1.6 Hz, 2.54H), 0.14 – 0.11 (m, 13.41H). <sup>13</sup>C NMR (101 MHz, CDCl<sub>3</sub>) δ 152.22, 150.12, 139.83, 136.84, 133.05, 130.24, 129.90, 127.55, 126.37, 124.78, 31.56, 31.42, 2.15, 1.17. HRMS (EI+) calcd for  $[C_{15}H_{29}OSi_2]^+$   $[M+H]^+$ : 281.17515, found: 281.17577.

### 1-(2-Fluorophenyl)-1,1,3,3,3-pentamethyldisiloxane and regioisomers (P5)

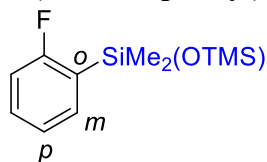

**P5** [*o*:*m*:*p* = 52:33:15]

Procedure A1: 66% conv., 66% isolated yield (80 mg) [*o*:*m*:*p* = 67:28:5]

Procedure A2: 74% conv., 72% isolated yield (87 mg) [*o*:*m*:*p* = 47:39:14]

Procedure A3: 77% conv., 71% isolated yield (86 mg) [*o*:*m*:*p* = 44:43:13]

<sup>1</sup>H NMR (400 MHz, CDCl<sub>3</sub>) 7.55 – 7.46 (m, 1.41H) 7.37 (tdd, *J* = 9.9, 6.9, 2.2 Hz, 1.38H), 7.33 – 7.29 (m, 0.47H), 7.23 (dd, *J* = 9.1, 2.7 Hz, 0.51H), 7.15 (t, *J* = 7.3 Hz, 0.94H), 7.09 – 7.02 (m, 0.81H), 6.99 (t, *J* = 8.4 Hz, 0.94H), 0.38 (d, *J* = 1.2 Hz, 6H), 0.33 (d, *J* = 3.3 Hz, 4.09H), 0.12 (s, 9.6H), 0.10 (d, *J* = 5.2 Hz, 6.16H). <sup>13</sup>C NMR (101 MHz, CDCl<sub>3</sub>) δ 168.22, 165.83, 163.97, 161.51, 143.46 (d, *J* = 3.8 Hz), 135.25 (d, *J* = 11.3 Hz), 135.08 (d, *J* = 7.4 Hz), 131.67 (d, *J* = 8.2 Hz), 129.65 (d, *J* = 6.9 Hz), 128.58 (d, *J* = 3.0 Hz), 126.14 (d, *J* = 29.9 Hz), 123.87 (d, *J* = 2.9 Hz), 119.44 (d, *J* = 18.4 Hz), 116.18 (d, *J* = 21.0 Hz), 114.87 (d, *J* = 7.0 Hz), 114.78 (d, *J* = 25.4 Hz), 2.07, 2.02, 1.57 (d, *J* = 1.5 Hz), 0.94. <sup>19</sup>F NMR (376 MHz, CDCl<sub>3</sub>) δ -101.12 – -101.43 (m), -111.89 (tt, *J* = 9.4, 6.2 Hz), -113.92 (tdd, *J* = 9.0, 5.2, 1.2 Hz). HRMS (EI<sup>+</sup>) calcd for [C<sub>11</sub>H<sub>20</sub>FOSi<sub>2</sub>]<sup>+</sup> [M+H]<sup>+</sup>: 243.1031, found: 243.10344

### 1-(2-Chlorophenyl)-1,1,3,3,3-pentamethyldisiloxane and regioisomers (P6)

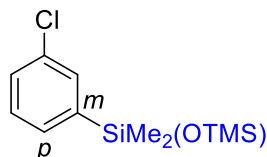

**P6** [*m*:*p* = 78:22]

Procedure A1: 60% conv., 50% isolated yield (65 mg) (*m*:*p* = 78:22)

Procedure A2: 77% conv., 76% isolated yield (98 mg) (*m*:*p* = 60:40)

Procedure A3: 83% conv., 64% isolated yield (83 mg) (*m*:*p* = 77:23)

<sup>1</sup>H NMR (400 MHz, CDCl<sub>3</sub>) δ 7.50 – 7.47 (m, 1.18H), 7.46 (d, *J* = 1.9 Hz, 0.32H), 7.41 (dt, *J* = 6.9, 1.3 Hz, 0.91H), 7.37 – 7.33 (m, 1.5H), 7.32 – 7.27 (m, 1H), 0.33 (s, 5.8H), 0.32 (s, 1.67H), 0.11 (s, 8.48H), 0.09 (s, 2.85H). <sup>13</sup>C NMR (101 MHz, CDCl<sub>3</sub>) δ 143.01, 134.52, 134.28, 132.95, 131.03, 129.36, 128.07, 2.09, 0.98 (d, *J* = 4.4 Hz). HRMS (EI<sup>+</sup>) calcd for [C<sub>11</sub>H<sub>20</sub>ClOSi<sub>2</sub>]<sup>+</sup> [M+H]<sup>+</sup>: 259.0736, found: 259.07467.

### 1-Methyl-2-(1,1,3,3,3-pentamethyldisiloxaneyl)-1*H*-pyrrole and regioisomer and 1-methyl-2,4-bis(1,1,3,3,3-pentamethyldisiloxaneyl)-1*H*-pyrrole (P7)

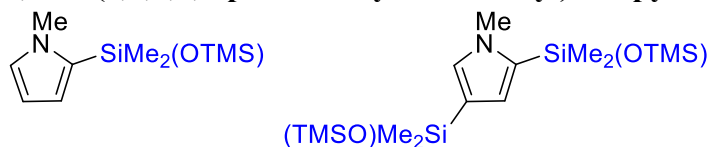

**P7** [*α*:*β*:bis(*α*,*β*') = 84:6:10]

Procedure A1: 64% conv., 48% isolated yield (54 mg) [*α*:*β*:bis(*α*,*β*') = 72:13:15]

Procedure A2: 67% conv., 65% isolated yield (74 mg) [*α*:*β*:bis(*α*,*β*') = 72:13:15]

<sup>1</sup>H NMR (400 MHz, CDCl<sub>3</sub>) δ 6.82 (t, *J* = 2.0 Hz, 1H), 6.71 (s, 0.15H), 6.71 (s, 0.18H), 6.43 (dd, *J* = 3.5, 1.5 Hz, 0.98H), 6.42 (s, 0.09H), 6.28 (t, *J* = 2.1 Hz, 0.13H), 6.18 (dd, *J* = 3.5, 2.4 Hz, 1.01H), 3.91 (s, 0.13H), 3.80 (s, 2.93H), 3.70 (s, 0.38H), 0.40 (s, 0.75H), 0.39 (s, 5.84H), 0.31 (s, 0.95H), 0.12 (s, 12.54H). <sup>13</sup>C NMR (101 MHz, CDCl<sub>3</sub>) δ 138.25, 132.72, 127.64, 126.67, 122.81, 118.96, 118.31 (d, *J* = 16.5 Hz), 113.14, 107.71, 36.69, 35.63, 1.77, 1.47. HRMS (EI<sup>+</sup>) calcd for



$[\text{C}_{10}\text{H}_{22}\text{NO}_2\text{Si}_2]^+$   $[\text{M}+\text{H}]^+$ : 228.1234, found: 228.12406 calcd for  $[\text{C}_{15}\text{H}_{36}\text{NO}_2\text{Si}_4]^+$   $[\text{M}+\text{H}]^+$ : 374.1818, found: 374.1823.

### 1-(Furan-2-yl)-1,1,3,3,3-pentamethyldisiloxane and regioisomer and 2,5-bis(1,1,3,3,3-pentamethyldisiloxaneyl) furan (P8)

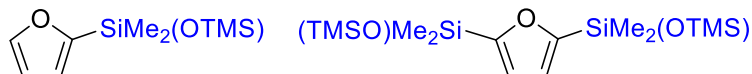

**P8** [ $\alpha$ : $\beta$ :bis( $\alpha$ , $\alpha'$ ) = 80:2:18]

Procedure A1: 71% conv., 71% isolated yield (102 mg) [ $\alpha$ :bis( $\alpha$ , $\alpha'$ ) = 83:17]

Procedure A3: 48% conv., 44% isolated yield (63 mg) [ $\alpha$ :bis( $\alpha$ , $\alpha'$ ) = 86:14]

Procedure E: 65% conv., 49% isolated yield (53 mg) [ $\alpha$ :bis( $\alpha$ , $\alpha'$ ) = 92:8] trace amounts of  $\beta$  present in  $^1\text{H}$  NMR

$^1\text{H}$  NMR (400 MHz,  $\text{CDCl}_3$ )  $\delta$  7.64 (d,  $J$  = 1.6 Hz, 0.94H), 7.58 (s, 0.02H), 7.49 (d,  $J$  = 1.7 Hz, 0.03H), 7.40 (s, 0.03H), 6.68 (d,  $J$  = 3.2 Hz, 0.95H), 6.65 (s, 0.44H), 6.38 (dd,  $J$  = 3.3, 1.6 Hz, 1H), 0.34 (s, 8.72H), 0.28 (s, 0.29H), 0.10 (s, 0.49H), 0.06 (d,  $J$  = 1.8 Hz, 14.32H).  $^{13}\text{C}$  NMR (126 MHz,  $\text{CDCl}_3$ )  $\delta$  163.87, 159.83, 119.85 (d,  $J$  = 4.0 Hz), 119.43, 109.61 – 109.01 (m), 1.83 (d,  $J$  = 2.7 Hz), 0.50 (d,  $J$  = 11.5 Hz). HRMS (EI+) calcd for  $[\text{C}_9\text{H}_{19}\text{O}_2\text{Si}_2]^+$   $[\text{M}+\text{H}]^+$ : 215.0918, found: 215.09161 calcd for  $[\text{C}_{14}\text{H}_{33}\text{O}_3\text{Si}_4]^+$   $[\text{M}+\text{H}]^+$ : 361.1501, found: 361.1495.

### 1,1,1,3,3-Pentamethyl-3-(5-methylfuran-2-yl)disiloxane (P9)

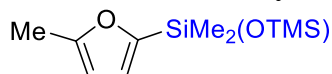

**P9**

Procedure A1: 71% conv., 50% isolated yield (57 mg)

$^1\text{H}$  NMR (400 MHz,  $\text{CDCl}_3$ )  $\delta$  6.57 (d,  $J$  = 3.1 Hz, 1H), 5.96 (dq,  $J$  = 3.1, 1.0 Hz, 1H), 2.35 – 2.31 (m, 3H), 0.31 (s, 6H), 0.06 (s, 9H).  $^{13}\text{C}$  NMR (101 MHz,  $\text{CDCl}_3$ )  $\delta$  157.90, 156.22, 120.90, 105.47, 13.59, 1.68, 0.31. HRMS (EI+) calcd for  $[\text{C}_{10}\text{H}_{21}\text{O}_2\text{Si}_2]^+$   $[\text{M}+\text{H}]^+$ : 229.1075, found: 229.10681.

### 1,1,1,3,3-Pentamethyl-3-(thiophen-2-yl)disiloxane and regioisomer (P10)

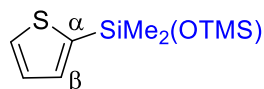

**P10** [ $\alpha$ : $\beta$  = 95:5]

Procedure A1: 20 h. 44% conv., 41% isolated yield (47 mg) [ $\alpha$ : $\beta$  = 95:5]

$^1\text{H}$  NMR (400 MHz,  $\text{CDCl}_3$ )  $\delta$  7.61 (dd,  $J$  = 4.6, 0.9 Hz, 1H), 7.51 (dt,  $J$  = 2.6, 1.1 Hz, 0.05H), 7.39 (dd,  $J$  = 4.8, 2.6 Hz, 0.06H), 7.36 (s, 0.08H), 7.32 (dd,  $J$  = 3.3, 0.9 Hz, 0.99H), 7.20 (dd,  $J$  = 4.6, 3.3 Hz, 0.99H), 0.40 (s, 6.37H), 0.34 (s, 0.26H), 0.10 (s, 11.23H).  $^{13}\text{C}$  NMR (101 MHz,  $\text{CDCl}_3$ )  $\delta$  139.73, 134.01, 130.42, 127.88, 1.81. HRMS (EI+) calcd for  $[\text{C}_{11}\text{H}_{25}\text{O}_2\text{SSi}_3]^+$   $[\text{M}+\text{H}]^+$ : 305.0878, found: 305.08748.

### 1-Methyl-2-(1,1,3,3,3-pentamethyldisiloxaneyl)-1*H*-indole (P11)

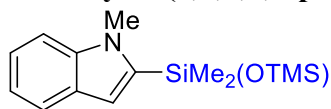

#### P11

Procedure A1: 52% conv., 49% isolated yield (136 mg)

$^1\text{H}$  NMR (400 MHz,  $\text{CDCl}_3$ )  $\delta$  7.65 (dt,  $J = 7.9, 1.0$  Hz, 1H), 7.36 (dd,  $J = 8.2, 1.1$  Hz, 1H), 7.26 (ddd,  $J = 8.2, 6.3, 1.2$  Hz, 1H), 7.11 (ddd,  $J = 7.9, 6.9, 1.0$  Hz, 1H), 6.73 (d,  $J = 0.9$  Hz, 1H), 3.92 (s, 3H), 0.47 (s, 6H), 0.12 (s, 9H).  $^{13}\text{C}$  NMR (101 MHz,  $\text{CDCl}_3$ )  $\delta$  140.73, 139.93, 128.13, 122.13, 120.88, 119.05, 111.11, 109.07, 32.78, 1.82, 1.44. HRMS (EI+) calcd for  $[\text{C}_{14}\text{H}_{24}\text{NOSi}_2]^+$   $[\text{M}+\text{H}]^+$ : 278.1391, found: 278.13991.

### 1-(Benzofuran-2-yl)-1,1,3,3,3-pentamethyldisiloxane (P12)

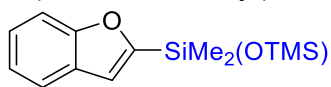

#### P12

Procedure A1: 51% conv., 45% isolated yield (119 mg)

Procedure E: 81% conv., 60% isolated yield (79 mg)

$^1\text{H}$  NMR (400 MHz,  $\text{CDCl}_3$ )  $\delta$  7.67 (dt,  $J = 7.6, 0.9$  Hz, 1H), 7.63 – 7.58 (m, 1H), 7.37 (ddd,  $J = 8.4, 7.2, 1.4$  Hz, 1H), 7.32 – 7.25 (m, 1H), 7.09 (d,  $J = 1.1$  Hz, 1H), 0.51 (s, 6H), 0.20 (d,  $J = 0.7$  Hz, 9H).  $^{13}\text{C}$  NMR (101 MHz,  $\text{CDCl}_3$ )  $\delta$  162.43, 157.78, 127.74, 124.48, 122.27, 121.17, 116.08, 111.35, 1.72, 0.31. HRMS (EI+) calcd for  $[\text{C}_{13}\text{H}_{21}\text{O}_2\text{Si}_2]^+$   $[\text{M}+\text{H}]^+$ : 265.1075, found: 265.10728.

### 1-(Benzo[b]thiophen-2-yl)-1,1,3,3,3-pentamethyldisiloxane (P40)

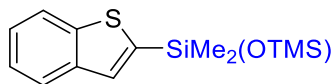

#### P40

Procedure A1: 20 h. 51% conv., 45% isolated yield (119 mg).

$^1\text{H}$  NMR (500 MHz,  $\text{CDCl}_3$ )  $\delta$  7.89 (d,  $J = 7.5$  Hz, 1H), 7.85 – 7.81 (m, 1H), 7.49 (s, 1H), 7.33 (tt,  $J = 7.8, 6.0$  Hz, 2H), 0.43 (s, 6H), 0.11 (s, 9H).  $^{13}\text{C}$  NMR (126 MHz,  $\text{CDCl}_3$ )  $\delta$  143.62, 141.92, 141.05, 131.02, 124.47, 124.12, 123.81, 122.43, 2.06 (d,  $J = 2.9$  Hz), 1.84. HRMS (EI+) calcd for  $[\text{C}_{13}\text{H}_{21}\text{OSSi}_2]$   $[\text{M}]$ : 280.0773, found: 280.07703.

## 2.10 Representative procedure for Rh-catalyzed C—H silylation of arenes and heteroarenes with Si-2 (Procedure B1)

In a  $\text{N}_2$ -filled glovebox, an oven-dried pressure tube was charged with **C4** (2.3 mg, 0.25 mol %) and benzene (43 mg, 1.1 equiv.). The reaction was allowed to stir for 10 minutes at 22 °C. To the mixture, **Si-2** (111.3 mg, 0.5 equiv.) and cyclohexene (49.3 mg, 1.2 equiv.) were added. The reaction mixture was allowed to stir for 7 h at 80 °C (88% conv., 70% yield by  $^1\text{H}$  NMR analysis).

Isolated yield was obtained after the following workup procedure was done outside the glovebox. Evaporation of the crude mixture, diluting the residue with *n*-hexanes, and filtration through a

syringe filter by rinsing with *n*-hexanes was done. The filtrate was then purified by silica gel chromatography affording the desired product (**P13**) as a colorless liquid [70% isolated yield (105 mg)].

### 2.11 Representative procedure for portion-wise Rh-catalyzed C—H silylation of arenes and heteroarenes with Si-2 (Procedure B2)

In a N<sub>2</sub>- filled glovebox, an oven-dried pressure tube was charged with **C4** (2.3 mg, 0.25 mol %) and benzene (43 mg, 1.1 equiv.). The reaction was allowed to stir for 10 minutes at 22 °C. To the mixture, **Si-2** (55.6 mg, 0.5 equiv.) and cyclohexene (49.3 mg, 1.2 equiv.) were added. The reaction mixture was allowed to stir for 1 h at 80 °C. To the mixture, **Si-2** (55.6 mg, 0.5 equiv.) was added and allowed to stir for 6 h at 80 °C (80% conv., 77% yield by <sup>1</sup>H NMR analysis).

Isolated yield was obtained after the following workup procedure was done outside the glovebox. Evaporation of the crude mixture, diluting the residue with *n*-hexanes, and filtration through a syringe filter by rinsing with *n*-hexanes was done. The filtrate was then purified by silica gel chromatography affording the desired product (**P13**) as a colorless liquid [77% isolated yield (115 mg)].

### 2.12 Representative procedure for portion-wise Rh-catalyzed C—H silylation of arenes and heteroarenes with Si-2 with solvent (Procedure B3)

In a N<sub>2</sub>- filled glovebox, an oven-dried pressure tube was charged with **C4** (2.3 mg, 0.25 mol %) and benzene (43 mg, 1.1 equiv.). The reaction was allowed to stir for 10 minutes at 22 °C. To the mixture, **Si-2** (55.6 mg, 0.5 equiv.), cyclohexene (49.3 mg, 1.2 equiv.) and THF (328.9 mg, 1.35 M) were added. The reaction mixture was allowed to stir for 1 h at 80 °C. To the mixture, **Si-2** (55.6 mg, 0.5 equiv.) was added and allowed to stir for 6 h at 80 °C (85% conv., 84% yield by <sup>1</sup>H NMR analysis).

Isolated yield was obtained after the following workup procedure was done outside the glovebox. Evaporation of the crude mixture, diluting the residue with *n*-hexanes, and filtration through a syringe filter by rinsing with *n*-hexanes was done. The filtrate was then purified by silica gel chromatography affording the desired product (**P13**) as a colorless liquid [84% isolated yield (125 mg)].

### 1,1,1,3,5,5,5-Heptamethyl-3-phenyltrisiloxane (**P13**)

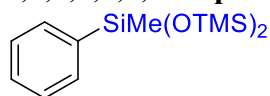

#### **P13**

Procedure B1: 88% conv., 70% isolated yield (104 mg)

Procedure B2: 80% conv., 77% isolated yield (115 mg)

Procedure B3: 85% conv., 84% isolated yield (125 mg)

<sup>1</sup>H NMR (500 MHz, CDCl<sub>3</sub>) δ 7.58 – 7.53 (m, 2H), 7.38 – 7.32 (m, 3H), 0.27 (s, 3H), 0.10 (s, 18H). Spectroscopic data were consistent with those previously reported.<sup>2</sup>

### 1,1,1,3,5,5,5-Heptamethyl-3-(naphthalen-2-yl)trisiloxane and regioisomer (P14)

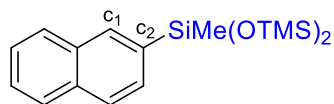

**P14** [ $c_1:c_2 = 44:56$ ]

Procedure B1: 97% conv., 95% isolated yield (165 mg) [ $c_1:c_2 = 21:79$ ]

Procedure B2: 82% conv., 79% isolated yield (138 mg) [ $c_1:c_2 = 19:81$ ]

Procedure B3: 77% conv., 70% isolated yield (122 mg) [ $c_1:c_2 = 21:79$ ]

$^1\text{H}$  NMR (400 MHz,  $\text{CDCl}_3$ )  $\delta$  8.09 (d,  $J = 2.8$  Hz, 1.5H), 7.92 – 7.83 (m, 4.57H), 7.67 (ddd,  $J = 8.1, 2.4, 1.2$  Hz, 1.52H), 7.52 (ddd,  $J = 7.2, 3.5, 1.5$  Hz, 3.05H), 0.40 (d,  $J = 1.7$  Hz, 2.39H), 0.39 (s, 3H), 0.18 (d,  $J = 1.7$  Hz, 13.85H), 0.17 (s, 18.83H).  $^{13}\text{C}$  NMR (101 MHz,  $\text{CDCl}_3$ )  $\delta$  136.13, 134.24, 134.15, 132.96, 129.67, 128.47, 127.86, 127.00, 126.53, 125.92, 2.06, 0.24. HRMS (EI+) calcd for  $[\text{C}_{17}\text{H}_{29}\text{O}_2\text{Si}_3]^+$   $[\text{M}+\text{H}]^+$ : 349.147, found: 349.14624.

### 3-(2-Methoxyphenyl)-1,1,1,3,5,5,5-heptamethyltrisiloxane and regioisomers (P15)

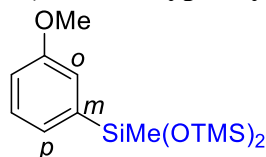

**P15** [ $o:m:p = 24:65:11$ ]

Procedure B1: 3 equiv. arene. 88% conv., 83% isolated yield (136 mg) ( $o:m:p = 24:64:11$ )

Procedure B2: 3 equiv. arene. 60% conv., 40% isolated yield (66 mg) ( $o:m:p = 21:66:13$ )

Procedure B3: 3 equiv. arene. 70% conv., 51% isolated yield (84 mg) ( $o:m:p = 24:65:11$ )

$^1\text{H}$  NMR (400 MHz,  $\text{CDCl}_3$ )  $\delta$  7.51 (d,  $J = 1.8$  Hz, 0.08H), 7.50 – 7.47 (m, 0.81H), 7.36 (ddd,  $J = 7.8, 6.5, 1.8$  Hz, 0.17H), 7.29 (t,  $J = 7.7$  Hz, 0.97H), 7.14 (dq,  $J = 7.1, 1.0$  Hz, 1.02H), 7.10 (d,  $J = 2.8$  Hz, 1H), 6.91 (dddd,  $J = 9.4, 6.4, 1.9, 0.9$  Hz, 1.76H), 6.81 (d,  $J = 8.2$  Hz, 0.14H), 3.82 (s, 4.46H), 3.79 (s, 0.4H), 0.29 – 0.27 (m, 0.73H), 0.27 (d,  $J = 1.0$  Hz, 3.52H), 0.26 – 0.24 (m, 1.34H), 0.12 (d,  $J = 0.9$  Hz, 18.86H), 0.11 – 0.08 (m, 14.92H).  $^{13}\text{C}$  NMR (101 MHz,  $\text{CDCl}_3$ )  $\delta$  164.18, 160.80, 158.97, 140.26, 135.62, 134.91, 131.40, 129.96, 129.01, 125.71, 120.36, 118.55, 115.10, 113.42, 109.36, 55.20, 55.12, 54.74, 2.01. Spectroscopic data were consistent with those previously reported.<sup>2</sup>

### 3-(4-(tert-Butyl)phenyl)-1,1,1,3,5,5,5-heptamethyltrisiloxane and regioisomer (P16)

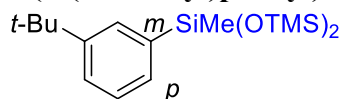

**P16** [ $m:p = 67:33$ ]

Procedure B1: 3 equiv. arene. 55% conv., 49% isolated yield (87 mg) [ $m:p = 67:33$ ]

$^1\text{H}$  NMR (400 MHz,  $\text{CDCl}_3$ )  $\delta$  7.62 (q,  $J = 1.6$  Hz, 0.76H), 7.51 (dd,  $J = 8.2, 1.6$  Hz, 0.93H), 7.45 – 7.36 (m, 2.84H), 7.31 (d,  $J = 7.5$  Hz, 0.53H), 1.35 (q,  $J = 1.7$  Hz, 9.36H), 1.34 (d,  $J = 1.4$  Hz, 3.76H), 0.29 (d,  $J = 1.5$  Hz, 2.97H), 0.28 – 0.26 (m, 1.82H), 0.13 (d,  $J = 1.5$  Hz, 28.3H).  $^{13}\text{C}$  NMR (101 MHz,  $\text{CDCl}_3$ )  $\delta$  152.44, 149.98, 138.13, 135.18, 133.28, 130.52, 130.22, 127.46, 126.54,

124.67, 34.82, 31.55, 31.41, 2.04 (d,  $J = 1.3$  Hz), 0.42, 0.29. HRMS (EI+) calcd for  $[C_{17}H_{35}O_2Si_3]^+$   $[M+H]^+$ : 355.1939, found: 355.19538.

### 3-(2-Fluorophenyl)-1,1,1,3,5,5,5-heptamethyltrisiloxane and regioisomers (P17)

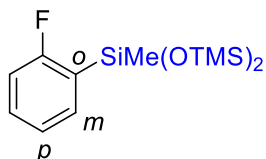

**P17** [*o*:*m*:*p* = 41:41:18]

Procedure B1: 3 equiv. arene. 64% conv., 64% isolated yield (101 mg) [*o*:*m*:*p* = 41:33:26]

Procedure B2: 3 equiv. arene. 51% conv., 47% isolated yield (74 mg) [*o*:*m*:*p* = 47:37:16]

Procedure B3: 3 equiv. arene. 58% conv., 37% isolated yield (59 mg) [*o*:*m*:*p* = 39:40:21]

$^1H$  NMR (400 MHz,  $CDCl_3$ )  $\delta$  7.51 (dddd,  $J = 12.4, 7.4, 4.7, 1.9$  Hz, 1.59H), 7.40 – 7.32 (m, 1.52H), 7.32 – 7.29 (m, 1.14H), 7.22 (dd,  $J = 9.0, 2.8$  Hz, 0.02H), 7.16 – 7.10 (m, 0.99H), 7.09 – 7.02 (m, 1.42H), 6.98 (t,  $J = 8.4$  Hz, 0.86H), 0.33 (d,  $J = 1.4$  Hz, 3H), 0.27 (s, 3.12H), 0.27 (s, 1.39), 0.11 (d,  $J = 3.8$  Hz, 43.41H).  $^{13}C$  NMR (101 MHz,  $CDCl_3$ )  $\delta$  168.40, 165.99, 163.90, 161.44, 141.73 (d,  $J = 4.0$  Hz), 135.57 (d,  $J = 10.8$  Hz), 135.37 (d,  $J = 7.5$  Hz), 134.38 (d,  $J = 3.9$  Hz), 131.92 (d,  $J = 8.3$  Hz), 129.61 (d,  $J = 6.9$  Hz), 128.87 (d,  $J = 3.0$  Hz), 124.71 (d,  $J = 29.3$  Hz), 123.77 (d,  $J = 3.0$  Hz), 119.68 (d,  $J = 18.6$  Hz), 116.46 (d,  $J = 21.0$  Hz), 114.94 (d,  $J = 5.4$  Hz), 114.72 (d,  $J = 11.0$  Hz), 1.98 (d,  $J = 1.6$  Hz), 1.88.  $^{19}F$  NMR (376 MHz,  $CDCl_3$ )  $\delta$  -101.28 (q,  $J = 6.5$  Hz), -111.41 (tt,  $J = 9.4, 6.2$  Hz), -113.85 -114.07 (m). HRMS (EI+) calcd for  $[C_{13}H_{26}FO_2Si_3]^+$   $[M+H]^+$ : 317.1219, found: 317.12275

### 3-(2-Chlorophenyl)-1,1,1,3,5,5,5-heptamethyltrisiloxane and regioisomers (P18)

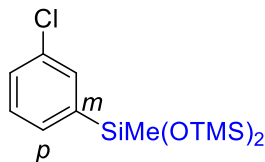

**P18** [*m*:*p* = 69:31]

Procedure B1: 3 equiv. arene. 89% conv., 81% isolated yield (135 mg) [*m*:*p* = 71:29]

Procedure B2: 3 equiv. arene. 87% conv., 82% isolated yield (136 mg) [*m*:*p* = 79:21]

Procedure B3: 3 equiv. arene. >98% conv., 78% isolated yield (130 mg) [*m*:*p* = 74:26]

$^1H$  NMR (400 MHz,  $CDCl_3$ ) 7.51 – 7.47 (m, 1.22H), 7.46 (d,  $J = 1.9$  Hz, 0.28H), 7.41 (dt,  $J = 7.1, 1.2$  Hz, 0.87H), 7.37 – 7.31 (m, 1.47H), 7.29 (d,  $J = 7.4$  Hz, 0.76H), 0.27 (s, 3H), 0.26 (s, 1.32H), 0.12 (s, 19.96H), 0.10 (d,  $J = 2.0$  Hz, 9.94H).  $^{13}C$  NMR (101 MHz,  $CDCl_3$ )  $\delta$  141.29, 136.99, 135.83, 134.76, 134.16, 133.36, 133.23, 131.27, 129.61, 129.30, 128.02, 127.73, 1.98, 1.82. HRMS (EI+) calcd for  $[C_{13}H_{26}ClO_2Si_3]^+$   $[M+H]^+$ : 333.0924, found: 333.09257.

### 2-(1,1,1,3,5,5,5-Heptamethyltrisiloxan-3-yl)-1-methyl-1H-pyrrole and regioisomer (P19) and 2,5-bis(1,1,1,3,5,5,5-heptamethyltrisiloxan-3-yl)-1-methyl-1H-pyrrole and regioisomer (P36+P37)

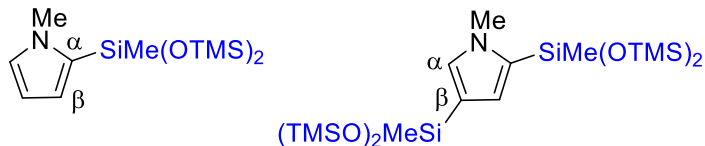

**P19, P36, P37** [ $\alpha$ : $\beta$ : bis( $\alpha$ , $\alpha'$ ): bis( $\alpha$ , $\beta'$ ) = 23:2:60:15]

Procedure B1: 100 °C. 80% conv., 77% isolated yield (116 mg) [ $\alpha$ : $\beta$ :bis( $\alpha$ ,  $\alpha'$ ):bis( $\alpha$ , $\beta'$ ) = 75:7:11:7]

Procedure B2: 100 °C. 62% conv., 62% isolated yield (93 mg) [ $\alpha$ : $\beta$ :bis( $\alpha$ , $\alpha'$ ):bis( $\alpha$ , $\beta'$ ) = 81:3:10:6]

Procedure B3: 100 °C. 72% conv., 71% isolated yield (107 mg) [ $\alpha$ :bis( $\alpha$ , $\alpha'$ ) = 89:11]

Procedure D: 100 °C. >98% conv., 86% isolated yield (224 mg) [bis( $\alpha$ , $\alpha'$ ):bis( $\alpha$ , $\beta'$ ) = 67:33]

<sup>1</sup>H NMR (400 MHz, CDCl<sub>3</sub>)  $\delta$  6.84 (d,  $J$  = 1.5 Hz, 0.5H), 6.79 (t,  $J$  = 1.9 Hz, 0.76H), 6.72 (t,  $J$  = 1.8 Hz, 0.06H), 6.69 (s, 0.03H), 6.55 (d,  $J$  = 1.5 Hz, 0.52H), 6.47 (dd,  $J$  = 3.5, 1.5 Hz, 0.75H), 6.44 (s, 2H), 6.28 (dd,  $J$  = 2.5, 1.6 Hz, 0.06H), 6.17 (dd,  $J$  = 3.5, 2.3 Hz, 0.76H), 3.89 (s, 2.84H), 3.79 (s, 2.18H), 3.78 (s, 1.65H), 0.37 (s, 6.36H), 0.36 (s, 5.93H), 0.35 (s, 2.17H), 0.16 (dd,  $J$  = 3.6, 1.7 Hz, 72.04H). <sup>13</sup>C NMR (101 MHz, CDCl<sub>3</sub>)  $\delta$  136.81, 132.75, 132.42, 131.45, 126.45, 125.23, 119.57, 118.88, 116.26, 107.69, 77.27, 76.96, 76.64, 37.12, 36.62, 36.39, 27.81, 26.60, 1.85, 1.71, 0.95 (d,  $J$  = 2.6 Hz). HRMS (EI+) calcd for [C<sub>12</sub>H<sub>28</sub>NO<sub>2</sub>Si<sub>3</sub>]<sup>+</sup> [M+H]<sup>+</sup>: 302.1422, found: 302.14334. HRMS (EI+) calcd for [C<sub>19</sub>H<sub>48</sub>NO<sub>4</sub>Si<sub>6</sub>]<sup>+</sup> [M+H]<sup>+</sup>: 522.2193, found: 522.22122.

### 3-(Furan-2-yl)-1,1,1,3,5,5,5-heptamethyltrisiloxane and regioisomer (P20) and 2,5-bis(1,1,1,3,5,5,5-heptamethyltrisiloxan-3-yl)furan and regioisomer (P34+P35)

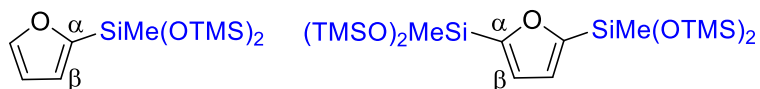

**P20, P34, P35** [ $\alpha$ : $\beta$ :bis( $\alpha$ , $\alpha'$ ): bis( $\alpha$ , $\beta'$ ) = 65:2:5:28]

Procedure B1: 100 °C. 92% conv., 75% isolated yield (108 mg) [ $\alpha$ :bis( $\alpha$ , $\alpha'$ ):bis( $\alpha$ , $\beta'$ ) = 75:21:4]

Procedure B2: 100 °C. 45% conv., 45% isolated yield (65 mg) [ $\alpha$ :bis( $\alpha$ , $\alpha'$ ):bis( $\alpha$ , $\beta'$ ) = 75:21:4]

Procedure B3: 100 °C. 72% conv., 71% isolated yield (102 mg) [( $\alpha$ :bis( $\alpha$ , $\alpha'$ ) = 89:11]

Procedure D: 100 °C. >98% conv., 86% isolated yield (152 mg) [bis( $\alpha$ , $\alpha'$ ):bis( $\alpha$ , $\beta'$ ) = 67:33]

<sup>1</sup>H NMR (400 MHz, CDCl<sub>3</sub>)  $\delta$  7.62 (d,  $J$  = 1.6 Hz, 1.01H), 7.57 (s, 0.08H), 7.47 (t,  $J$  = 1.6 Hz, 0.03H), 7.41 (s, 0.03H), 6.69 (d,  $J$  = 3.2 Hz, 1H), 6.66 (s, 0.09H), 6.65 (s, 0.85H), 6.37 (dd,  $J$  = 3.3, 1.6 Hz, 1.06H), 0.28 (d,  $J$  = 1.2 Hz, 5.86H), 0.11 (d,  $J$  = 1.1 Hz, 39.43H). <sup>13</sup>C NMR (126 MHz, CDCl<sub>3</sub>)  $\delta$  162.04, 158.15, 158.01, 151.86, 146.30, 123.75, 120.15 (d,  $J$  = 3.9 Hz), 119.67 (t,  $J$  = 2.6 Hz), 109.26, 1.97, 1.83 (dd,  $J$  = 5.5, 2.4 Hz), 0.20, 0.10. HRMS (EI+) calcd for [C<sub>11</sub>H<sub>25</sub>O<sub>3</sub>Si<sub>3</sub>]<sup>+</sup> [M+H]<sup>+</sup>: 289.1106, found: 289.11113 calcd for [C<sub>18</sub>H<sub>45</sub>O<sub>5</sub>Si<sub>6</sub>]<sup>+</sup> [M+H]<sup>+</sup>: 509.1877, found: 509.18761.

### 1,1,1,3,5,5,5-Heptamethyl-3-(5-methylfuran-2-yl)trisiloxane (P21)

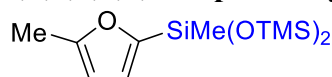

#### P21

Procedure B1: 100 °C. 86% conv., 74% isolated yield (112 mg)

$^1\text{H}$  NMR (400 MHz,  $\text{CDCl}_3$ )  $\delta$  6.58 (d,  $J = 3.1$  Hz, 1H), 5.95 (dq,  $J = 2.9, 1.0$  Hz, 0.93H), 2.33 (d,  $J = 1.0$  Hz, 2.88H), 0.27 (s, 3.56H), 0.11 (s, 17.97H). Trace amounts of  $\beta$  silylation product observed in  $^1\text{H}$  NMR. Spectroscopic data were consistent with those previously reported.<sup>3</sup>

### 2-(1,1,1,3,5,5,5-Heptamethyltrisiloxan-3-yl)-1-methyl-1*H*-indole and regioisomer (P22)

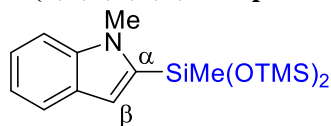

#### P22 [ $\alpha$ : $\beta$ = 64:36]

Procedure B1: 67% conv., 66% isolated yield (116 mg) [ $\alpha$ : $\beta$  = 60:40]

$^1\text{H}$  NMR (400 MHz,  $\text{CDCl}_3$ )  $\delta$  7.74 (d,  $J = 7.9$  Hz, 0.5H), 7.63 (d,  $J = 7.9$  Hz, 1H), 7.55 (s, 0.11H), 7.33 (t,  $J = 7.0$  Hz, 1.86H), 7.23 (dd,  $J = 8.3, 2.1$  Hz, 1.46H), 7.16 – 7.06 (m, 2.56H), 6.74 (s, 1H), 3.88 (s, 3H), 3.79 (s, 1.8H), 0.41 (s, 3H), 0.34 (s, 1.8H), 0.13 (d,  $J = 3.6$  Hz, 32H).  $^{13}\text{C}$  NMR (101 MHz,  $\text{CDCl}_3$ )  $\delta$  139.74, 139.38, 138.02, 135.85, 132.24, 128.08, 122.15 (d,  $J = 2.4$  Hz), 121.38, 120.96, 119.28, 118.98, 111.67, 109.12 (d,  $J = 5.6$  Hz), 108.59, 77.27, 76.96, 76.64, 32.73 (d,  $J = 3.1$  Hz), 1.90, 1.75, 0.85. HRMS (EI+) calcd for  $[\text{C}_{16}\text{H}_{30}\text{NO}_2\text{Si}_3]^+$  [ $\text{M}+\text{H}$ ] $^+$ : 352.1579, found: 352.15799.

### 3-(Benzofuran-2-yl)-1,1,1,3,5,5,5-heptamethyltrisiloxane (P23)

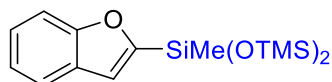

#### P23 [ $\alpha$ : $\beta$ = 79:21]

Procedure B1: 1 mmol **Si-2**, 100 °C. 90% conv., 88% isolated yield (298 mg) [ $\alpha$ : $\beta$  = 60:40]

$^1\text{H}$  NMR (400 MHz,  $\text{CDCl}_3$ )  $\delta$  7.82 – 7.79 (m, 0.07H), 7.73 – 7.69 (m, 1.07H), 7.69 (s, 0.1H), 7.63 (dd,  $J = 8.2, 1.1$  Hz, 1.15H), 7.39 (ddd,  $J = 8.3, 7.1, 1.3$  Hz, 1.21H), 7.35 (d,  $J = 1.4$  Hz, 0.03H), 7.31 (td,  $J = 7.4, 1.0$  Hz, 1.06H), 7.26 (s, 0.12H), 7.14 (d,  $J = 1.0$  Hz, 1.04H), 0.50 (s, 3H), 0.48 (s, 0.38H), 0.29 – 0.26 (m, 18H), 0.26 (s, 2.37H). Spectroscopic data were consistent with those previously reported.<sup>2</sup>

### 3-(benzo[b]thiophen-2-yl)-1,1,1,3,5,5,5-heptamethyltrisiloxane (P24)

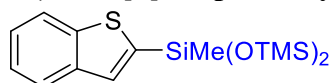

#### P24

Procedure B1: 1 mmol **Si-2**, 30 h, 100 °C. 67% conv., 44% isolated yield (156 mg)



$^1\text{H}$  NMR (400 MHz,  $\text{CDCl}_3$ )  $\delta$  7.94 – 7.86 (m, 1H), 7.86 – 7.81 (m, 1H), 7.50 (s, 1H), 7.38 – 7.30 (m, 2H), 0.37 (s, 3H), 0.15 (s, 18H). Spectroscopic data were consistent with those previously reported.<sup>3</sup>

### 2,5-Bis(1,1,1,3,5,5,5-heptamethyltrisiloxan-3-yl)thiophene (P38)

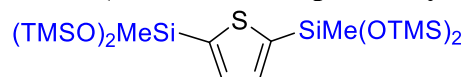

**P38**

Procedure D: 30 h, 100 °C. 75% conv., 40% isolated yield (69 mg)

$^1\text{H}$  NMR (400 MHz,  $\text{CDCl}_3$ )  $\delta$  7.33 (s, 2H), 0.32 (s, 6H), 0.11 (s, 36H). Spectroscopic data were consistent with those previously reported.<sup>3</sup>

### 1,1,1,3,5,5,5-Heptamethyl-3-(thiophen-2-yl)trisiloxane and regioisomer (P39)

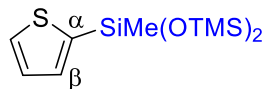

**P39** [  $\alpha$  :  $\beta$  = 97:3]

Procedure D: 30 h, 100 °C. 75% conv., 40% isolated yield (69 mg) ( $\alpha$ : $\beta$  = 79:21)

$^1\text{H}$  NMR (400 MHz,  $\text{CDCl}_3$ )  $\delta$  7.58 (dd,  $J$  = 4.6, 0.9 Hz, 0.99H), 7.53 (d,  $J$  = 1.2 Hz, 0.03H), 7.37 – 7.35 (m, 0.05H), 7.32 (dd,  $J$  = 3.3, 0.9 Hz, 1H), 7.20 (d,  $J$  = 1.0 Hz, 0.04H), 7.17 (dd,  $J$  = 4.6, 3.3 Hz, 1.04H), 0.33 (s, 3.26H), 0.28 (d, 0.25H), 0.12 (s, 22.27H). Spectroscopic data were consistent with those previously reported.<sup>4</sup>

### 2.13 Representative procedure for Rh-catalyzed C—H silylation of arenes and heteroarenes with Si-3 (Procedure C1)

In a  $\text{N}_2$ - filled glovebox, an oven-dried pressure tube was charged with  $[\text{Rh}(\text{nbd})\text{Cl}]_2$  (2.3 mg, 1 mol %), (*S*)-(-)-XylBINAP (7.3 mg, 2 mol %), and benzene (437.4 mg, 11.2 equiv.). The reaction was allowed to stir for 10 minutes at 22 °C. To the mixture, **Si-3** (148.3 mg, 1 equiv.) and 2,3-dimethyl-2-butene (63.1 mg, 1.5 equiv.) were added. The reaction mixture was allowed to stir for 15 h at 120 °C (95% conv., 92% yield by  $^1\text{H}$  NMR analysis).

Isolated yield was obtained after the following workup procedure was done outside the glovebox. Evaporation of the crude mixture, diluting the residue with *n*-hexanes, and filtration through a syringe filter by rinsing with *n*-hexanes was done. The filtrate was then purified by silica gel chromatography affording the desired product (**P25**) as a colorless liquid [92% isolated yield (171 mg)]

### 2.14 Representative procedure for portion-wise Rh-catalyzed C—H silylation of arenes and heteroarenes with Si-3 (Procedure C2)

In a  $\text{N}_2$ - filled glovebox, an oven-dried pressure tube was charged with  $[\text{Rh}(\text{nbd})\text{Cl}]_2$  (2.3 mg, 1 mol %), (*S*)-(-)-XylBINAP (7.3 mg, 2 mol %), and benzene (437.4 mg, 11.2 equiv.). The reaction was allowed to stir for 10 minutes at 22 °C. To the mixture, **Si-3** (74.1 mg, 0.5 equiv.) and 2,3-dimethyl-2-butene (63.1 mg, 1.5 equiv.) were added. The reaction mixture was allowed to stir for



11 h at 120 °C. To the mixture, **Si-3** (74.1 mg, 0.5 equiv.) was added and allowed to stir for 14 h at 120 °C (96% conv., 92% yield by <sup>1</sup>H NMR analysis).

Isolated yield was obtained after the following workup procedure was done outside the glovebox. Evaporation of the crude mixture, diluting the residue with *n*-hexanes, and filtration through a syringe filter by rinsing with *n*-hexanes was done. The filtrate was then purified by silica gel chromatography affording the desired product (**P25**) as a colorless liquid [92% isolated yield (171.5 mg)].

### 2.15 Representative procedure for portion-wise Rh-catalyzed C—H silylation of arenes and heteroarenes with **Si-3** with solvent (Procedure C3)

In a N<sub>2</sub>- filled glovebox, an oven-dried pressure tube was charged with [Rh(nbd)Cl]<sub>2</sub> (2.3 mg, 1 mol %), (*S*)-(-)-XylBINAP (7.3 mg, 2 mol %), and benzene (437.4 mg, 11.2 equiv.). The reaction was allowed to stir for 10 minutes at 22 °C. To the mixture, **Si-3** (74.1 mg, 0.5 equiv.), 2,3-dimethyl-2-butene (63.1 mg, 1.5 equiv.), and THF (328.9 mg, 1.35 M) were added. The reaction mixture was allowed to stir for 1 h at 120 °C. To the mixture, **Si-3** (74.1 mg, 0.5 equiv.) was added and allowed to stir for 14 h at 120 °C (78% conv., 60% yield by <sup>1</sup>H NMR analysis).

Isolated yield was obtained after the following workup procedure was done outside the glovebox. Evaporation of the crude mixture, diluting the residue with *n*-hexanes, and filtration through a syringe filter by rinsing with *n*-hexanes was done. The filtrate was then purified by silica gel chromatography affording the desired product (**P25**) as a colorless liquid [60% isolated yield (171.5 mg)].

#### 1,1,1,5,5,5-Hexamethyl-3-phenyl-3-((trimethylsilyl)oxy)trisiloxane (**P25**)

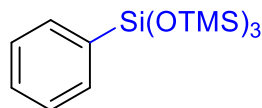

**P25**

Procedure C1: 95% conv., 92% isolated yield (172 mg)

Procedure C2: 80% conv., 77% isolated yield (144 mg)

Procedure C3: 78% conv., 60% isolated yield (112 mg)

<sup>1</sup>H NMR (400 MHz, CDCl<sub>3</sub>) δ 7.56 (d, *J* = 110.7 Hz, 2H), 7.35 (ddd, *J* = 13.7, 7.5, 5.8 Hz, 3H), 0.12 (s, 27H). <sup>13</sup>C NMR (101 MHz, CDCl<sub>3</sub>) δ 135.69, 133.97, 129.62, 127.65, 2.18. HRMS (EI+) calcd for [C<sub>15</sub>H<sub>33</sub>O<sub>3</sub>Si<sub>4</sub>]<sup>+</sup> [M+H]<sup>+</sup>: 373.1501, found: 373.15063.

#### 1,1,1,5,5,5-hexamethyl-3-(naphthalen-2-yl)-3-((trimethylsilyl)oxy)trisiloxane and regioisomer (**P26**)

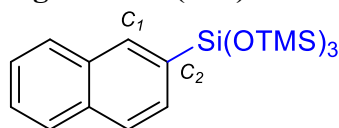

**P26** [C<sub>1</sub>:C<sub>2</sub> = 37:63]

Procedure C1: 1.5 mol % [Rh(nbd)Cl]<sub>2</sub>, 20 h. 70% conv., 66% isolated yield (151 mg) [c<sub>1</sub>:c<sub>2</sub> = 14:86]

Procedure C2: 1.5 mol % [Rh(nbd)Cl]<sub>2</sub>, 20 h. 66% conv., 64% isolated yield (147 mg) [c<sub>1</sub>:c<sub>2</sub> = 16:84]

Procedure C3: 1.5 mol % [Rh(nbd)Cl]<sub>2</sub>, 20 h. 80% conv., 60% isolated yield (138 mg) [c<sub>1</sub>:c<sub>2</sub> = 14:86]

<sup>1</sup>H NMR (400 MHz, CDCl<sub>3</sub>) δ 8.07 (s, 1H), 8.04 (s, 0.19H), 7.88 – 7.76 (m, 2.5H), 7.65 – 7.59 (m, 1.17H), 7.52 – 7.44 (m, 1.46H), 7.00 (s, 0.18H), 0.14 (d, *J* = 1.6 Hz, 31H). <sup>13</sup>C NMR (101 MHz, CDCl<sub>3</sub>) δ 142.84, 135.55, 134.98, 134.16, 133.13, 132.89, 130.73, 130.18, 130.07, 128.49, 127.84, 127.33, 126.89, 126.70, 126.54, 125.85, 110.36, 109.12, 65.82, 64.71, 1.94, 1.92. HRMS (EI<sup>+</sup>) calcd for [C<sub>19</sub>H<sub>34</sub>O<sub>3</sub>Si<sub>4</sub>]<sup>+</sup> [M+H]<sup>+</sup>: 423.1658, found: 423.16477.

### 3-(2-Methoxyphenyl)-1,1,1,5,5,5-hexamethyl-3-((trimethylsilyl)oxy)trisiloxane and regioisomer (P27)

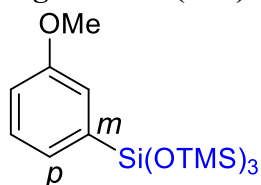

**P27** [*m*:*p* = 55:45]

Procedure C1: 1.5 mol % [Rh(nbd)Cl]<sub>2</sub>, 20 h. 53% conv., 34% isolated yield (69 mg) [*m*:*p* = 53:47]

Procedure C2: 1.5 mol % [Rh(nbd)Cl]<sub>2</sub>, 20 h. 51% conv., 45% isolated yield (91 mg) [*m*:*p* = 55:45]

Procedure C3: 1.5 mol % [Rh(nbd)Cl]<sub>2</sub>, 20 h. 44% conv., 44% isolated yield (89 mg) [*m*:*p* = 54:46]

<sup>1</sup>H NMR (400 MHz, CDCl<sub>3</sub>) δ 7.48 (d, *J* = 8.6 Hz, 1.61H), 7.29 (s, 1.22H), 7.14 (dt, *J* = 7.2, 1.1 Hz, 1H), 7.10 (d, *J* = 2.8 Hz, 1H), 6.96 – 6.89 (m, 1H), 6.88 (d, *J* = 2.0 Hz, 1.62H), 3.82 (s, 3H), 3.81 (s, 3H), 0.12 (s, 27H), 0.11 (s, 27H). <sup>13</sup>C NMR (101 MHz, CDCl<sub>3</sub>) δ 160.85, 158.85, 137.20, 135.52, 128.91, 126.92, 126.35, 119.08, 115.31, 113.34, 55.17, 55.09, 1.91, 1.83. HRMS (EI<sup>+</sup>) calcd for [C<sub>16</sub>H<sub>35</sub>O<sub>4</sub>Si<sub>4</sub>]<sup>+</sup> [M+H]<sup>+</sup>: 403.1607, found: 403.16095.

### 3-(2-Fluorophenyl)-1,1,1,5,5,5-hexamethyl-3-((trimethylsilyl)oxy)trisiloxane and regioisomers (P28)

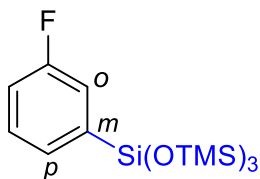

**P28** [*o*:*m*:*p* = 25:54:21]

Procedure C1: 1.5 mol % [Rh(nbd)Cl]<sub>2</sub>, 20 h. 71% conv., 71% isolated yield (140 mg) [*o*:*m*:*p* = 25:54:21]

Procedure C2: 1.5 mol % [Rh(nbd)Cl]<sub>2</sub>, 20 h. 53% conv., 53% isolated yield (104 mg) [*o*:*m*:*p* = 43:35:21]

Procedure C3: 1.5 mol % [Rh(nbd)Cl]<sub>2</sub>, 20 h. 70% conv., 63% isolated yield (123 mg) [*o:m:p* = 24:46:30]

<sup>1</sup>H NMR (400 MHz, CDCl<sub>3</sub>) δ 7.55 – 7.50 (m, 0.9H), 7.40 – 7.34 (m, 0.14H), 7.32 – 7.30 (m, 1H), 7.22 (dd, *J* = 9.3, 3.2 Hz, 0.99H), 7.12 (d, *J* = 7.3 Hz, 0.09H), 7.07 – 7.02 (m, 0.8H), 7.00 (d, *J* = 4.8 Hz, 0.36H), 6.96 (d, *J* = 8.4 Hz, 0.09H), 0.13 (s, 8.71H), 0.12 – 0.11 (m, 30.74H), 0.11 (s, 10.98H). <sup>13</sup>C NMR (101 MHz, CDCl<sub>3</sub>) δ 164.15 (d, *J* = 248.2 Hz), 162.55 (d, *J* = 247.1 Hz), 138.72 (d, *J* = 4.6 Hz), 136.34 (d, *J* = 10.2 Hz), 135.98 (d, *J* = 7.6 Hz), 132.02 (d, *J* = 8.3 Hz), 131.44 (d, *J* = 3.8 Hz), 129.51 (d), 123.64 (d, *J* = 3.1 Hz), 120.29 (d, *J* = 18.9 Hz), 116.56 (d, *J* = 21.1 Hz), 114.92, 1.86, 1.78. <sup>19</sup>F NMR (376 MHz, CDCl<sub>3</sub>) δ -99.61 (d, *J* = 5.9 Hz), -111.29 (tt, *J* = 9.4, 6.3 Hz), -114.11 (tdd, *J* = 9.0, 4.1, 2.3 Hz). HRMS (EI+) calcd for [C<sub>15</sub>H<sub>32</sub>FO<sub>3</sub>Si<sub>4</sub>]<sup>+</sup> [M+H]<sup>+</sup>: 391.1407, found: 391.14122.

### 3-(Furan-2-yl)-1,1,1,5,5,5-hexamethyl-3-((trimethylsilyl)oxy)trisiloxane (P29)

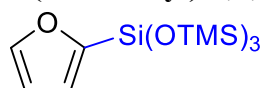

#### P29

Procedure C1: 85% conv., 73% isolated yield (134 mg)

Procedure C2: 48% conv.

Procedure C3: 32% conv., 32% isolated yield (58 mg)

[85% conv., 74% isolated yield (134 mg)]. <sup>1</sup>H NMR (400 MHz, CDCl<sub>3</sub>) δ 7.62 (d, *J* = 1.6 Hz, 1H), 6.70 (d, *J* = 3.2 Hz, 1H), 6.36 (dd, *J* = 3.3, 1.6 Hz, 1H), 0.11 (s, 27H). <sup>13</sup>C NMR (101 MHz, CDCl<sub>3</sub>) δ 155.23, 146.36, 120.96, 109.25, 1.73. HRMS (EI+) calcd for [C<sub>13</sub>H<sub>31</sub>O<sub>4</sub>Si<sub>4</sub>]<sup>+</sup> [M+H]<sup>+</sup>: 363.1294, found: 363.12899.

### 1,1,1,5,5,5-Hexamethyl-3-(5-methylfuran-2-yl)-3-((trimethylsilyl)oxy)trisiloxane (P30)

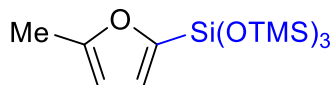

#### P30

Procedure C1: 20 h. 55% conv., 45% isolated yield (85 mg)

<sup>1</sup>H NMR (400 MHz, CDCl<sub>3</sub>) δ 6.58 (dd, *J* = 45.8, 3.1 Hz, 1H), 5.97 – 5.90 (m, 1H), 2.31 (d, *J* = 1.0 Hz, 3H), 0.11 (s, 27H). <sup>13</sup>C NMR (101 MHz, CDCl<sub>3</sub>) δ 156.26, 153.38, 122.15, 105.49, 13.75, 1.76. HRMS (EI+) calcd for [C<sub>14</sub>H<sub>33</sub>O<sub>4</sub>Si<sub>4</sub>]<sup>+</sup> [M+H]<sup>+</sup>: 377.145, found: 377.14378.

### 3-(5-Ethylfuran-2-yl)-1,1,1,5,5,5-hexamethyl-3-((trimethylsilyl)oxy)trisiloxane (P31)

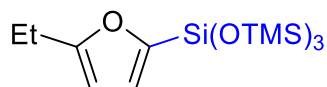

#### P31

Procedure C1: 1.5 mol % [Rh(nbd)Cl]<sub>2</sub>, 20 h. 37% conv., 34% isolated yield (67 mg)

$^1\text{H}$  NMR (400 MHz,  $\text{CDCl}_3$ )  $\delta$  6.59 (d,  $J = 3.1$  Hz, 1H), 5.94 (dt,  $J = 3.1, 0.9$  Hz, 1H), 2.67 (qd,  $J = 7.6, 1.0$  Hz, 2H), 1.24 (t,  $J = 7.6$  Hz, 3H), 0.11 (s, 27H).  $^{13}\text{C}$  NMR (101 MHz,  $\text{CDCl}_3$ )  $\delta$  161.96, 153.17, 121.88, 103.98, 21.68, 12.56, 1.74. HRMS (EI+) calcd for  $[\text{C}_{15}\text{H}_{35}\text{O}_4\text{Si}_4]^+$   $[\text{M}+\text{H}]^+$ : 391.1607, found: 391.15954.

### 3-(5-*tert*-Butyl)furan-2-yl)-1,1,1,5,5,5-hexamethyl-3-((trimethylsilyl)oxy)trisiloxane (P32)

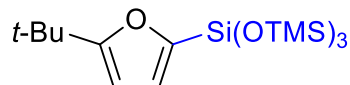

**P32**

Procedure C1: 1.5 mol %  $[\text{Rh}(\text{nbd})\text{Cl}]_2$ , 20 h. 70% conv., 66% isolated yield (140 mg)

$^1\text{H}$  NMR (400 MHz,  $\text{CDCl}_3$ )  $\delta$  6.57 (d,  $J = 3.2$  Hz, 1H), 5.93 (d,  $J = 3.2$  Hz, 1H), 1.29 (s, 9H), 0.11 (s, 27H).  $^{13}\text{C}$  NMR (101 MHz,  $\text{CDCl}_3$ )  $\delta$  168.50, 152.96, 121.61, 101.91, 32.90, 29.37, 1.74. HRMS (EI+) calcd for  $[\text{C}_{17}\text{H}_{39}\text{O}_4\text{Si}_4]^+$   $[\text{M}+\text{H}]^+$ : 419.192, found: 419.19218.

### 3-(4,5-Dimethylfuran-2-yl)-1,1,1,5,5,5-hexamethyl-3-((trimethylsilyl)oxy)trisiloxane (P33)

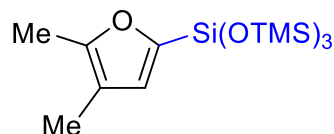

**P33**

Procedure C1: 1.5 mol %  $[\text{Rh}(\text{nbd})\text{Cl}]_2$ , 20 h. 39% conv., 31% isolated yield (60 mg)

$^1\text{H}$  NMR (400 MHz,  $\text{CDCl}_3$ )  $\delta$  6.45 (s, 1H), 2.21 (s, 3H), 1.93 (s, 3H), 0.11 (s, 27H).  $^{13}\text{C}$  NMR (101 MHz,  $\text{CDCl}_3$ )  $\delta$  151.70, 124.60, 113.71, 11.74, 9.86, 1.78. HRMS (EI+) calcd for  $[\text{C}_{15}\text{H}_{35}\text{O}_4\text{Si}_4]^+$   $[\text{M}+\text{H}]^+$ : 391.1607, found: 391.16063.

## 2.16 Representative procedure for Rh-catalyzed double C—H silylation with Si-2 (Procedure D)

In a  $\text{N}_2$ -filled glovebox, an oven-dried pressure tube was charged with **C4** (2.3 mg, 0.25 mol %) and furan (68.1 mg, 1 equiv.). The reaction was allowed to stir for 10 minutes at 22 °C. To the mixture, **Si-2** (556.3 mg, 2.5 equiv.) and cyclohexene (197.1 mg, 2.4 equiv.) were added. The reaction mixture was allowed to stir for 7 h at 100 °C (>98% conv., 60% yield by  $^1\text{H}$  NMR analysis).

Isolated yield was obtained after the following workup procedure was done outside the glovebox. Evaporation of the crude mixture, diluting the residue with *n*-hexanes, and filtration through a syringe filter by rinsing with *n*-hexanes was done. The filtrate was then purified by silica gel chromatography affording the desired products (**P34**, **P35**, **P20**) as a colorless liquid [60% isolated yield (108 mg)].

## 2.17 Representative procedure for acceptorless Rh-catalyzed C—H silylation with Si-1 (Procedure E)

In a  $\text{N}_2$ -filled glovebox, an oven-dried pressure tube was charged with **C4** (8.7 mg, 1 mol %) and furan (170.2 mg, 5 equiv.). The reaction was allowed to stir for 10 minutes at 22 °C. To the mixture,

**Si-1** (74.2 mg, 0.5 equiv.) was added. The reaction mixture was allowed to stir for 7 h at 100 °C (65% conv., 49% yield by <sup>1</sup>H NMR analysis).

Isolated yield was obtained after the following workup procedure was done outside the glovebox. Evaporation of the crude mixture, diluting the residue with *n*-hexanes, and filtration through a syringe filter by rinsing with *n*-hexanes was done. The filtrate was then purified by silica gel chromatography affording the desired product (**P9**) as a colorless liquid [49% isolated yield (71 mg)].

### 3. NMR spectra

#### 3.1 C—H silylation products

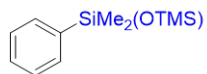

<sup>1</sup>H NMR of P1

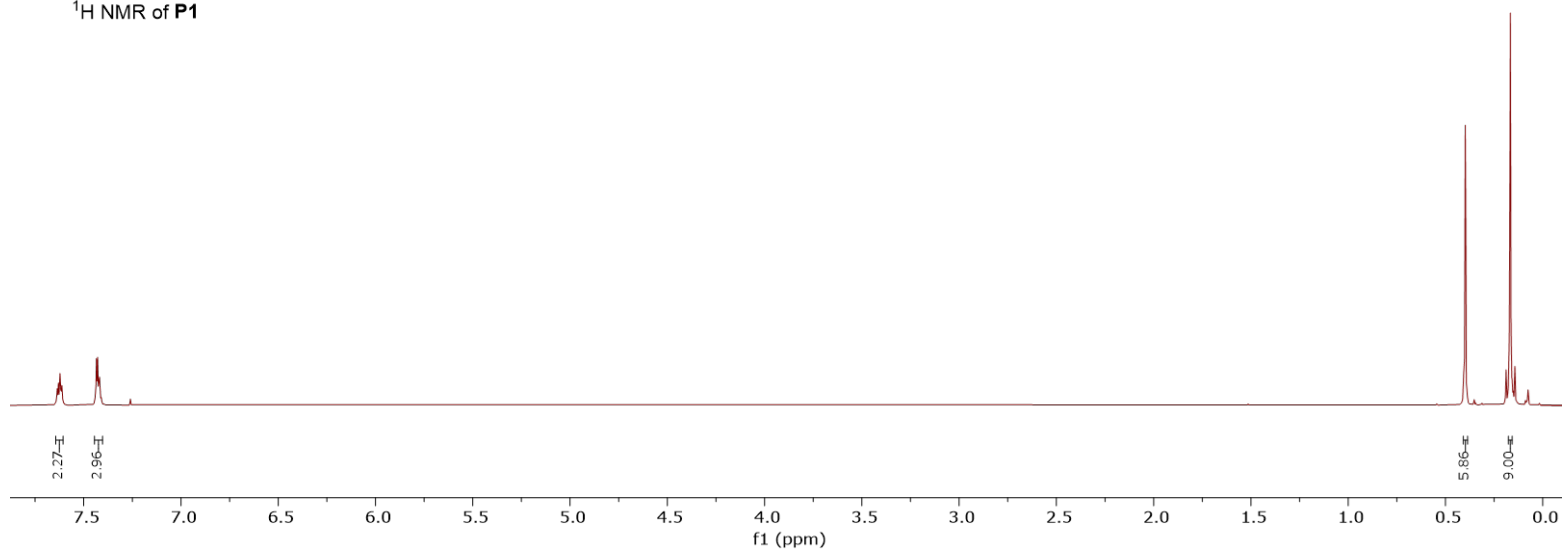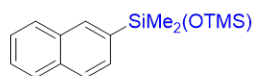

<sup>1</sup>H NMR of P2

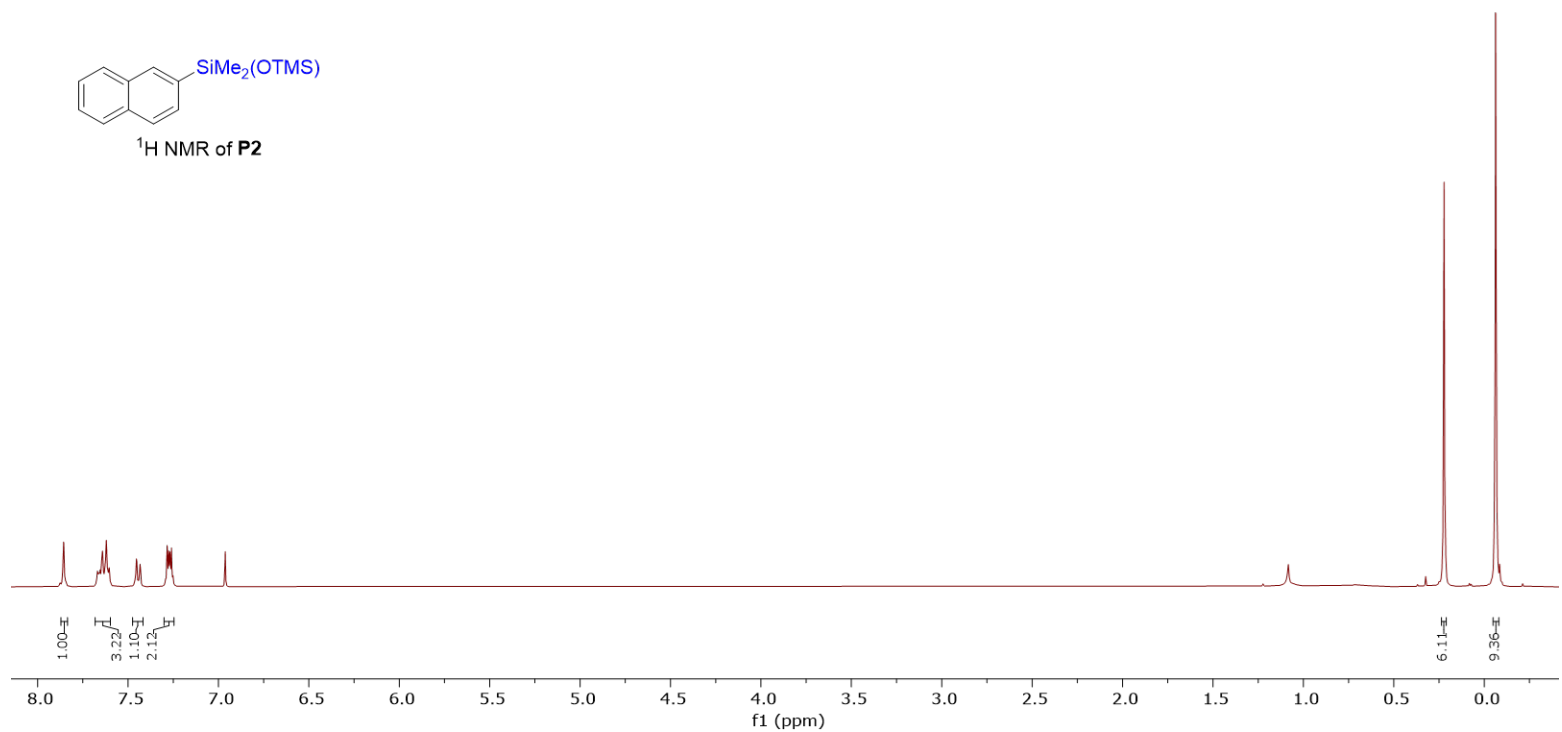

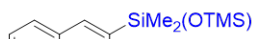

<sup>13</sup>C NMR of P2

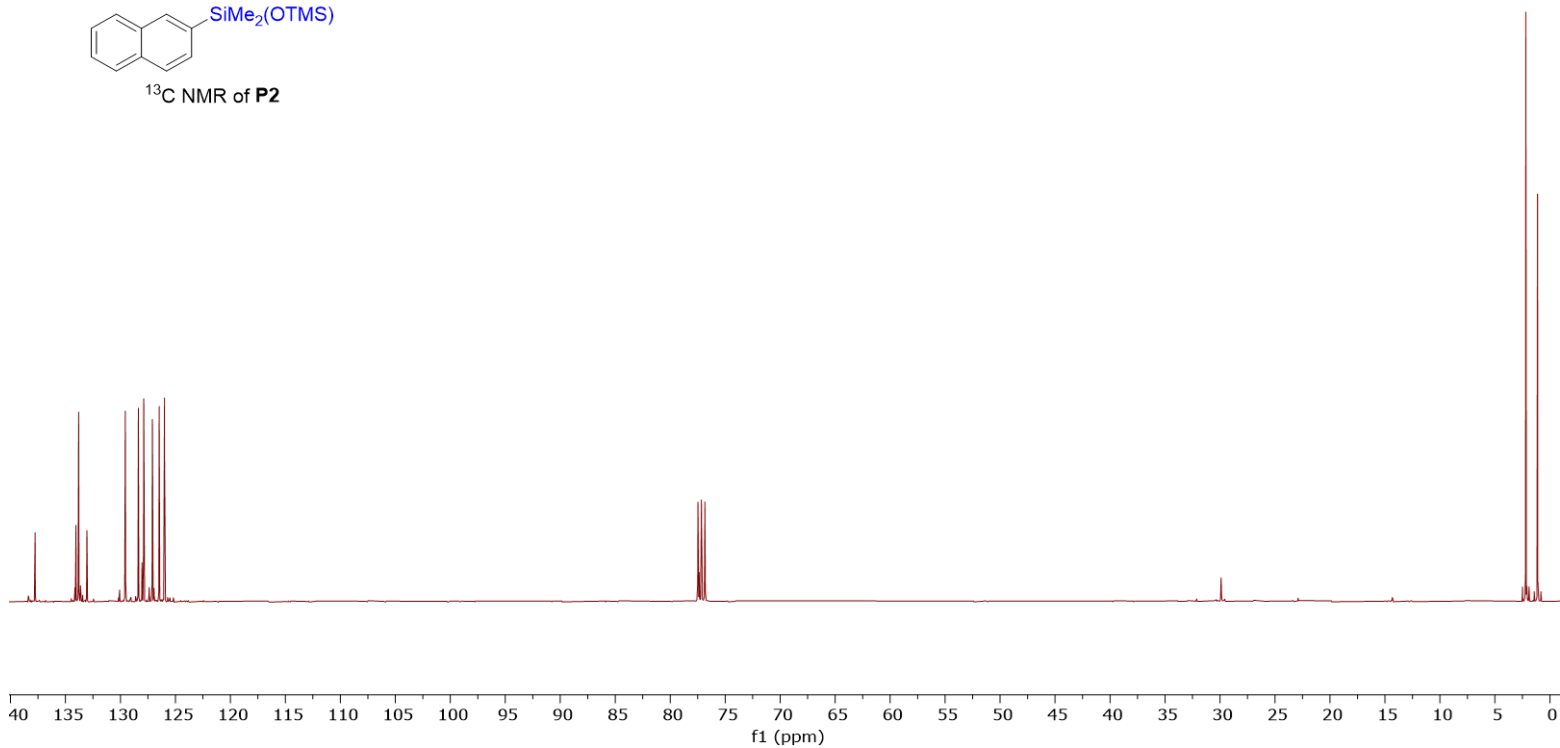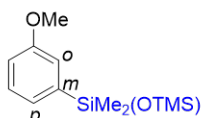

<sup>1</sup>H NMR of P3

[o:m:p = 24:61:15]

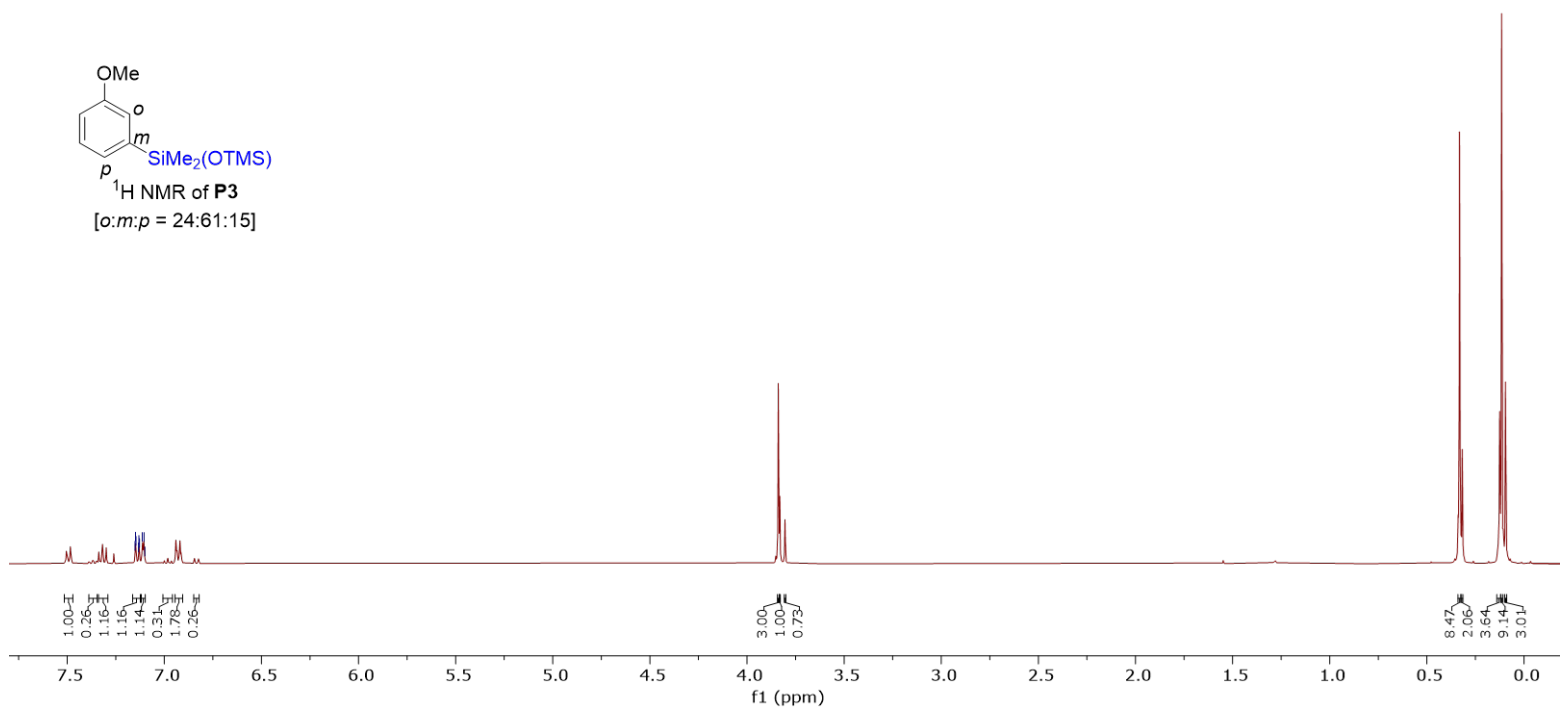

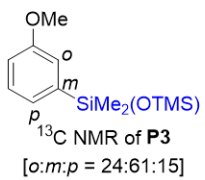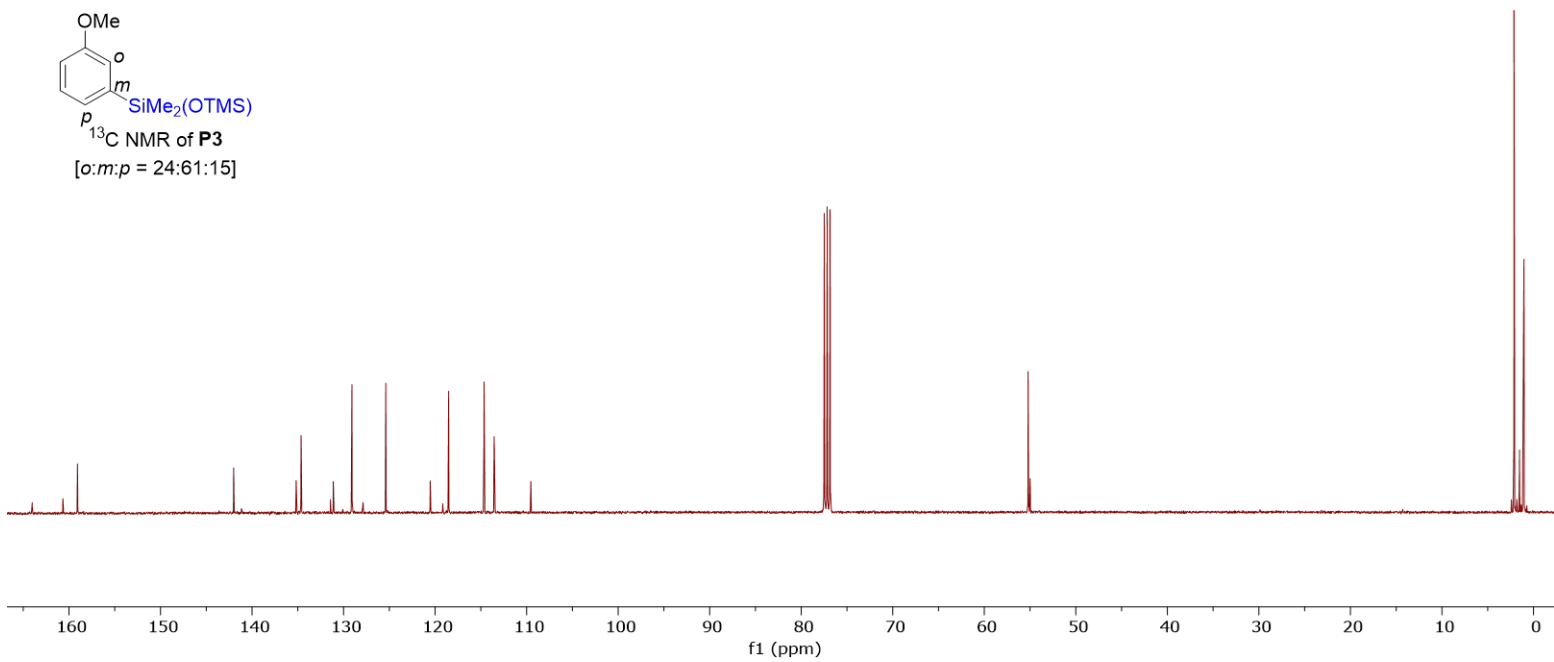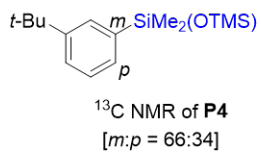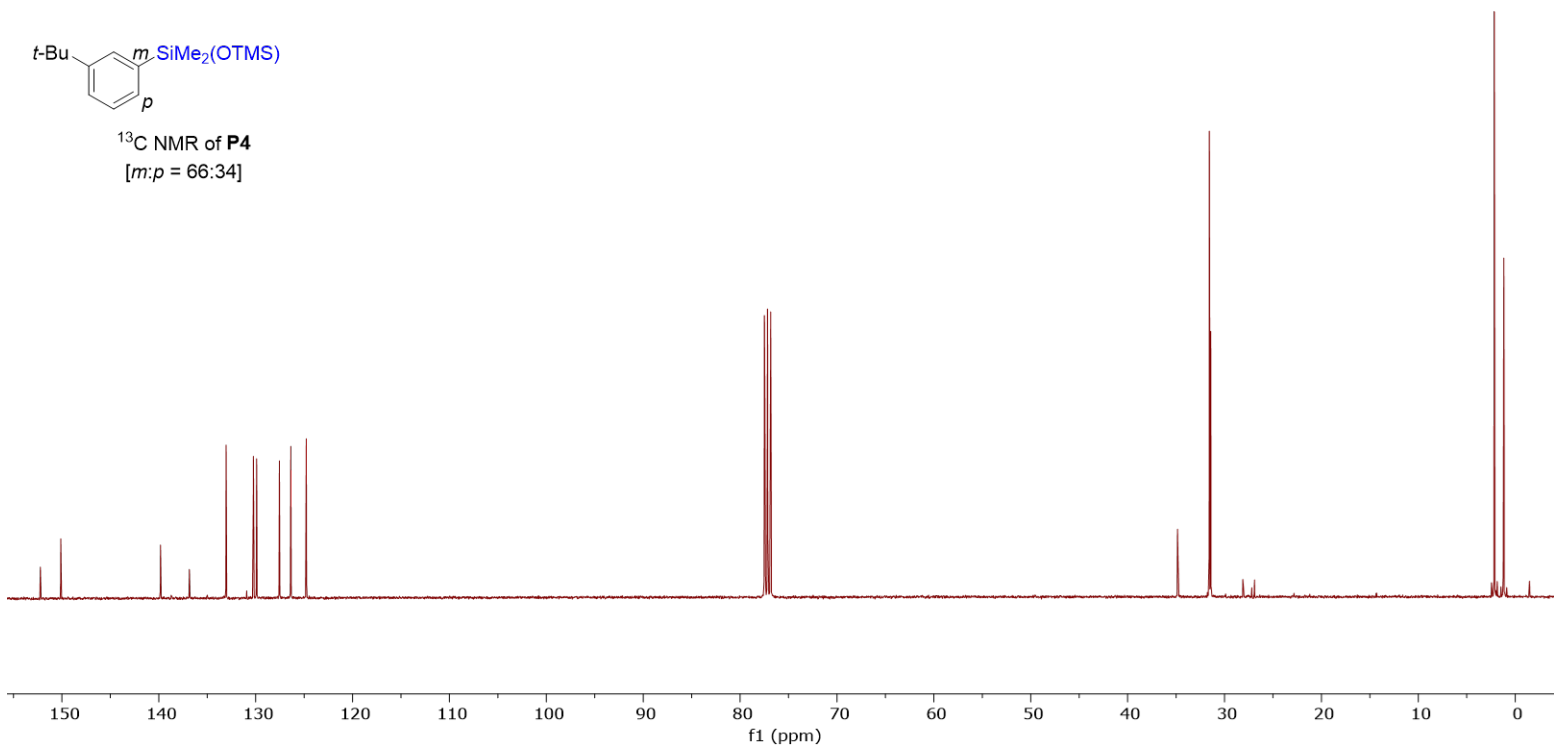



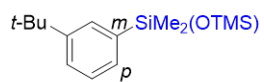

$^1\text{H}$  NMR of **P4**  
[*m*:*p* = 66:34]

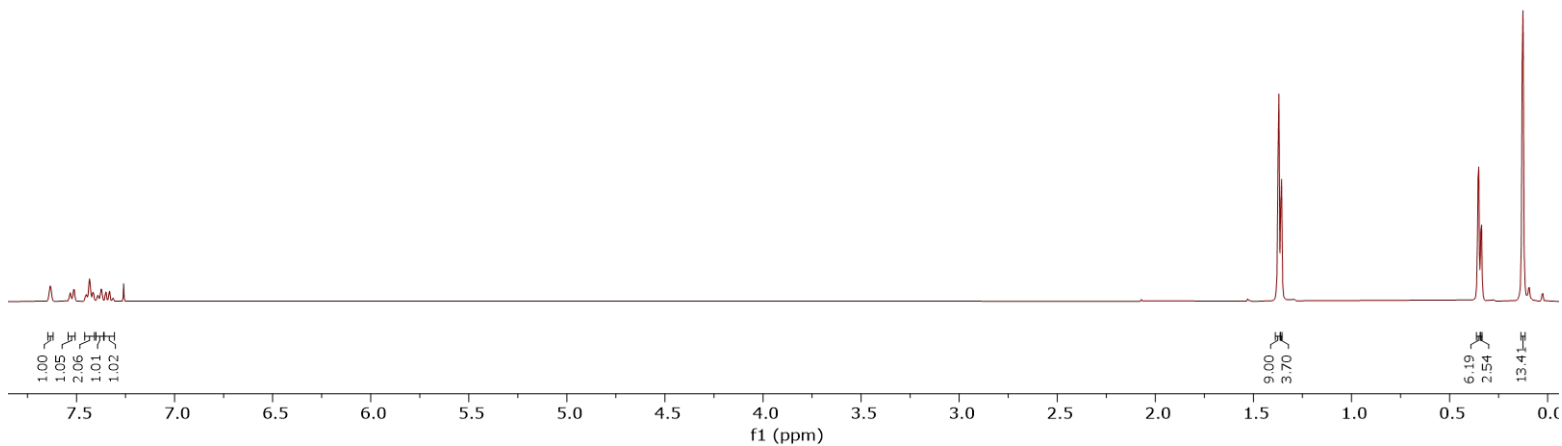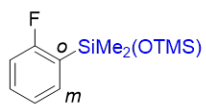

$^1\text{H}$  NMR of **P5**  
[*o*:*m*:*p* = 52:33:15]

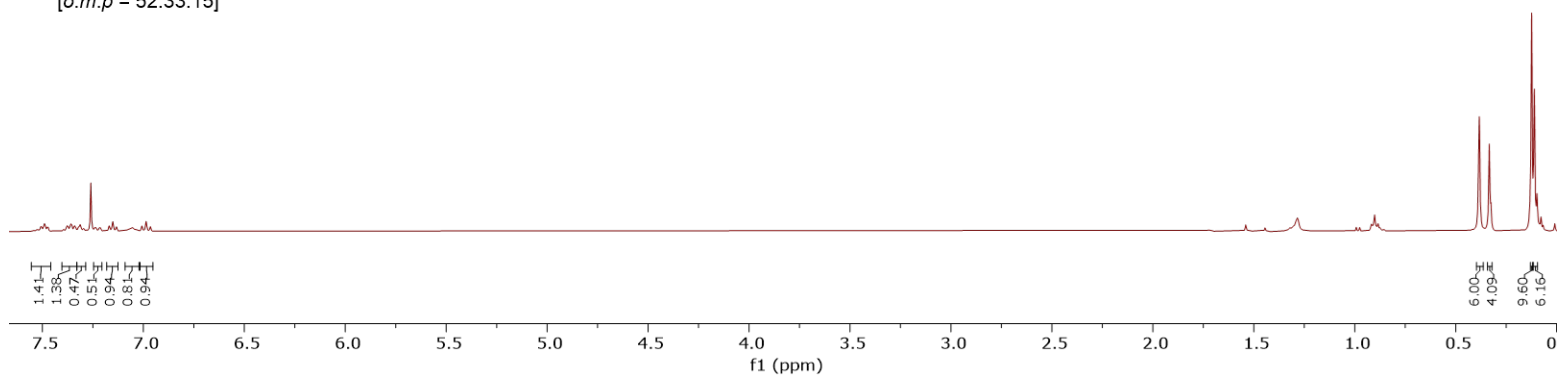

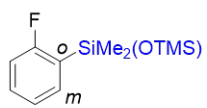

<sup>13</sup>C NMR of P5  
[o:m:p = 52:33:15]

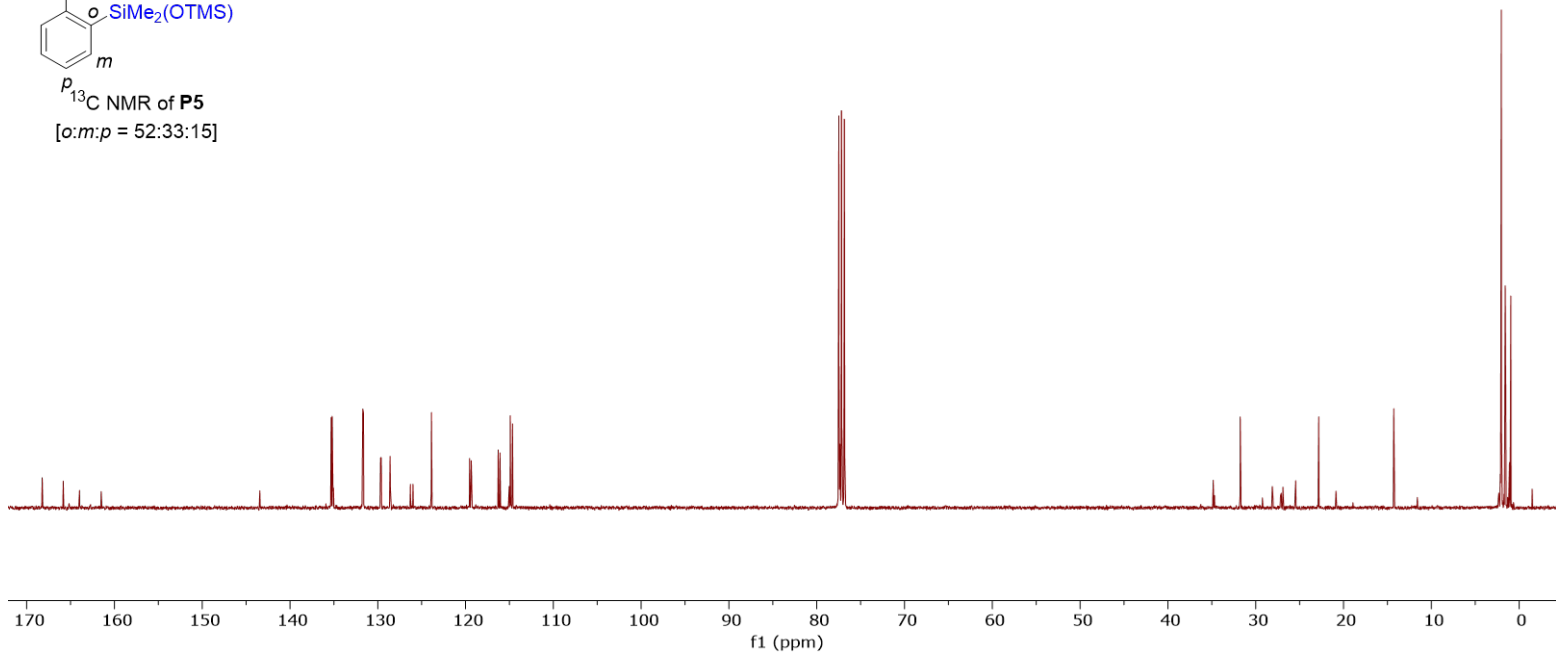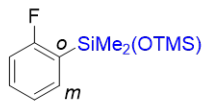

<sup>19</sup>F NMR of P5  
[o:m:p = 52:33:15]

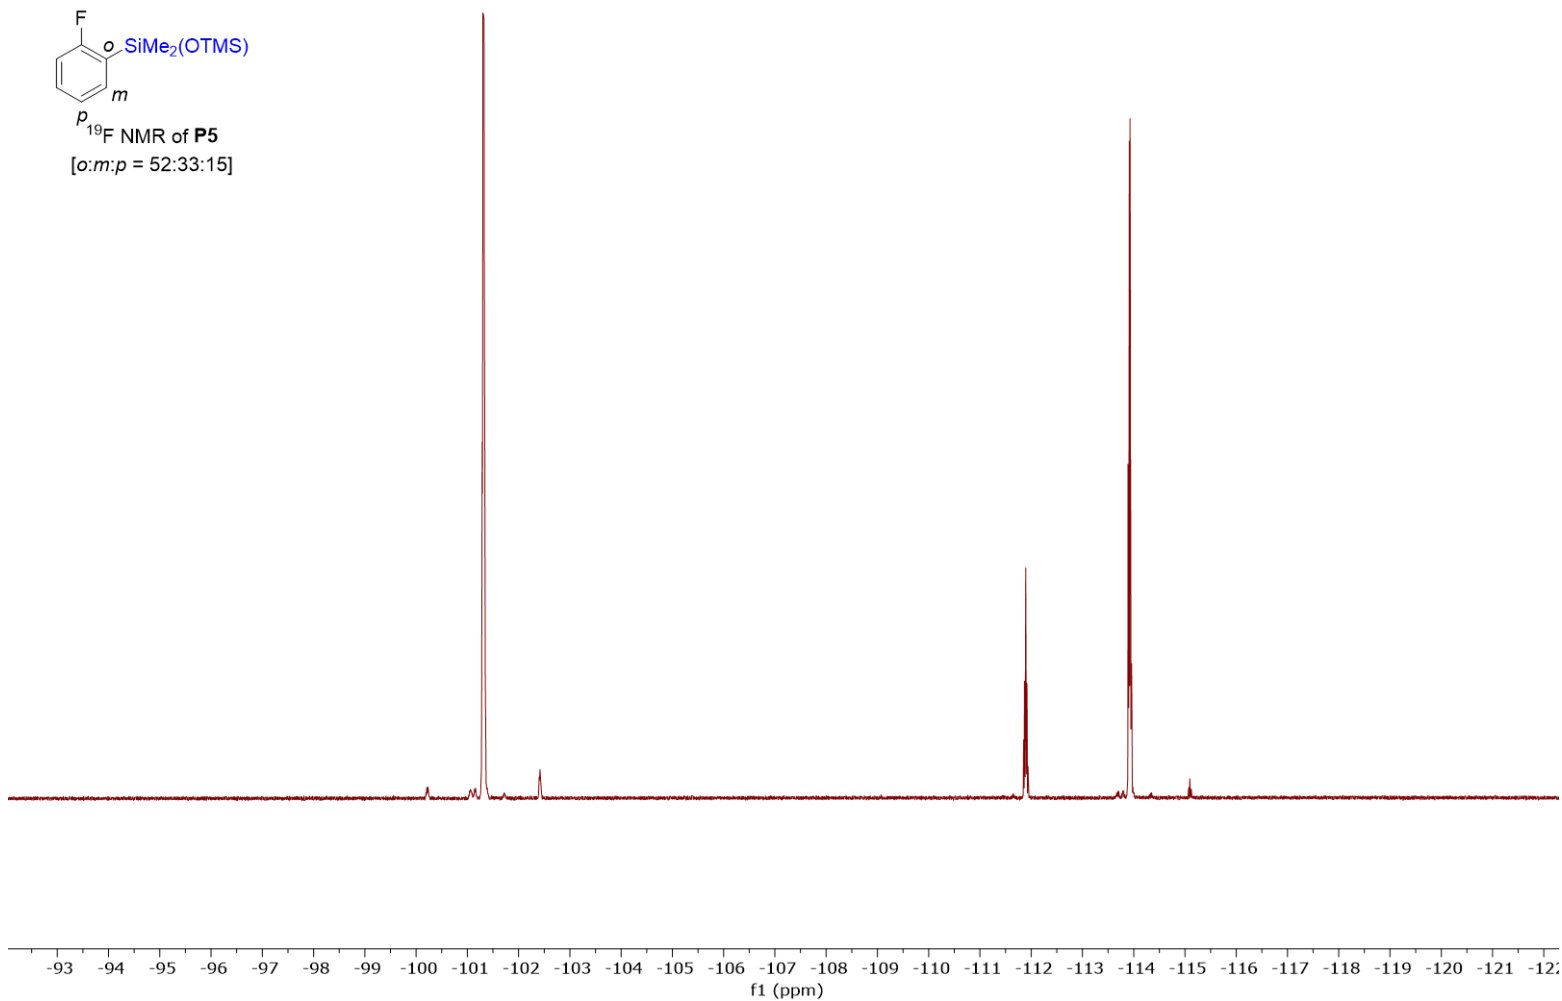

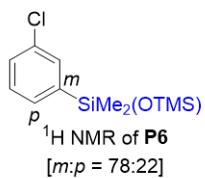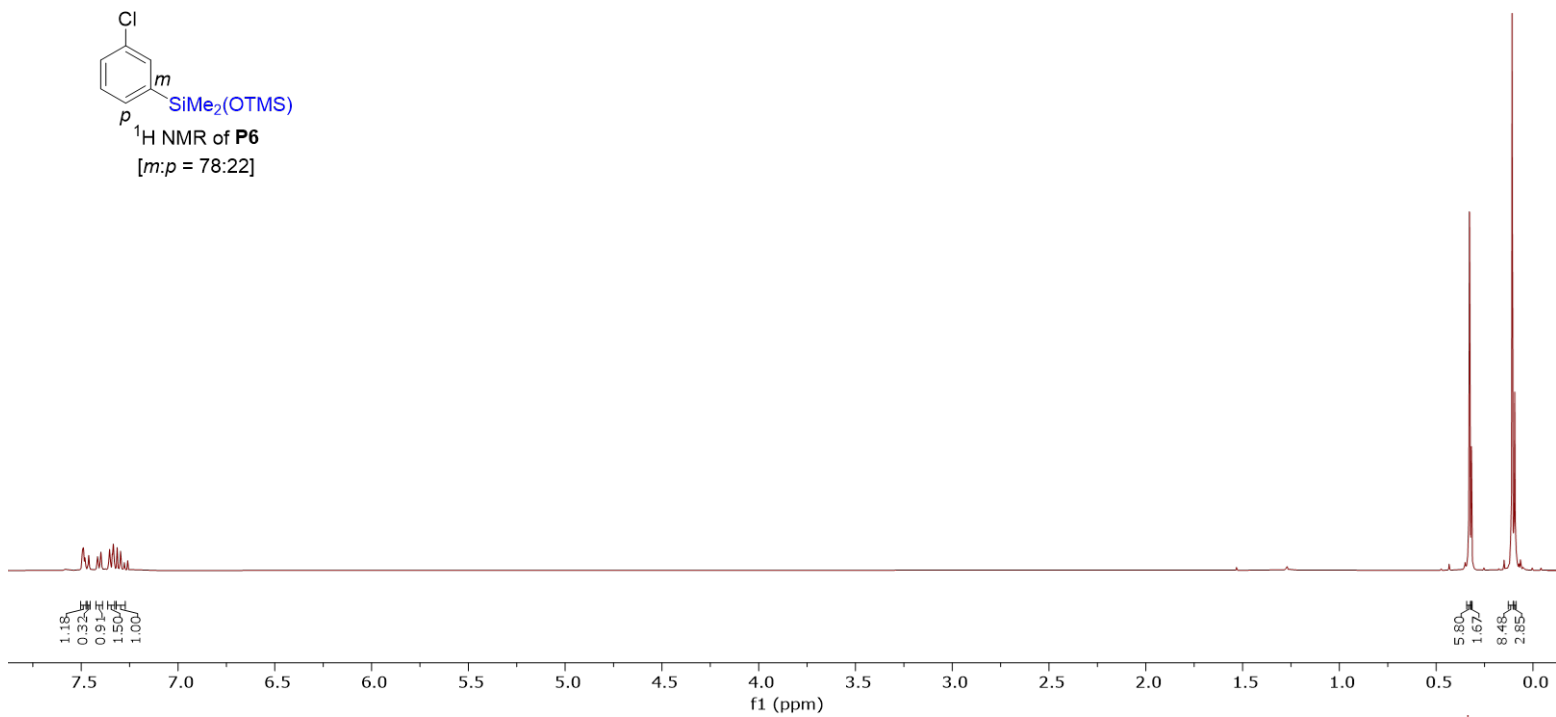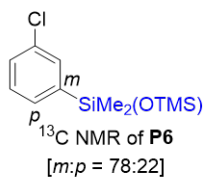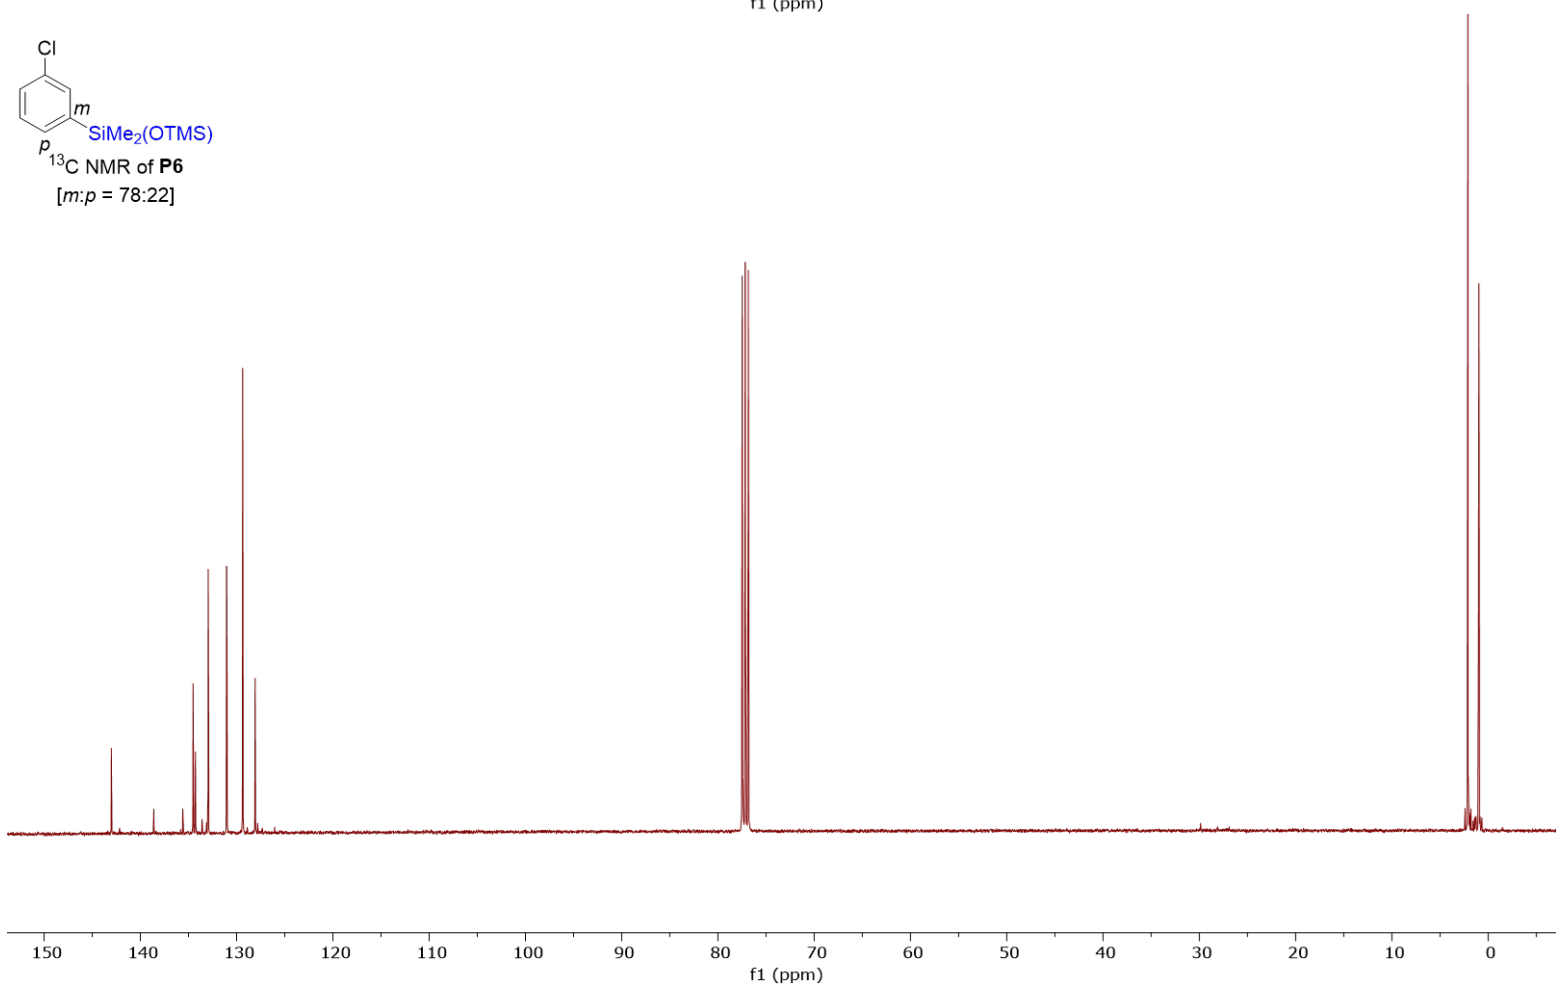

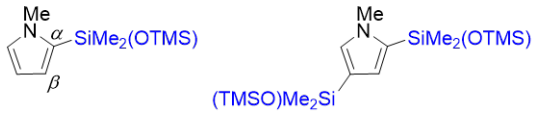

<sup>1</sup>H NMR of **P7**  
 [α:β:bis(α,β') = 84:6:10]

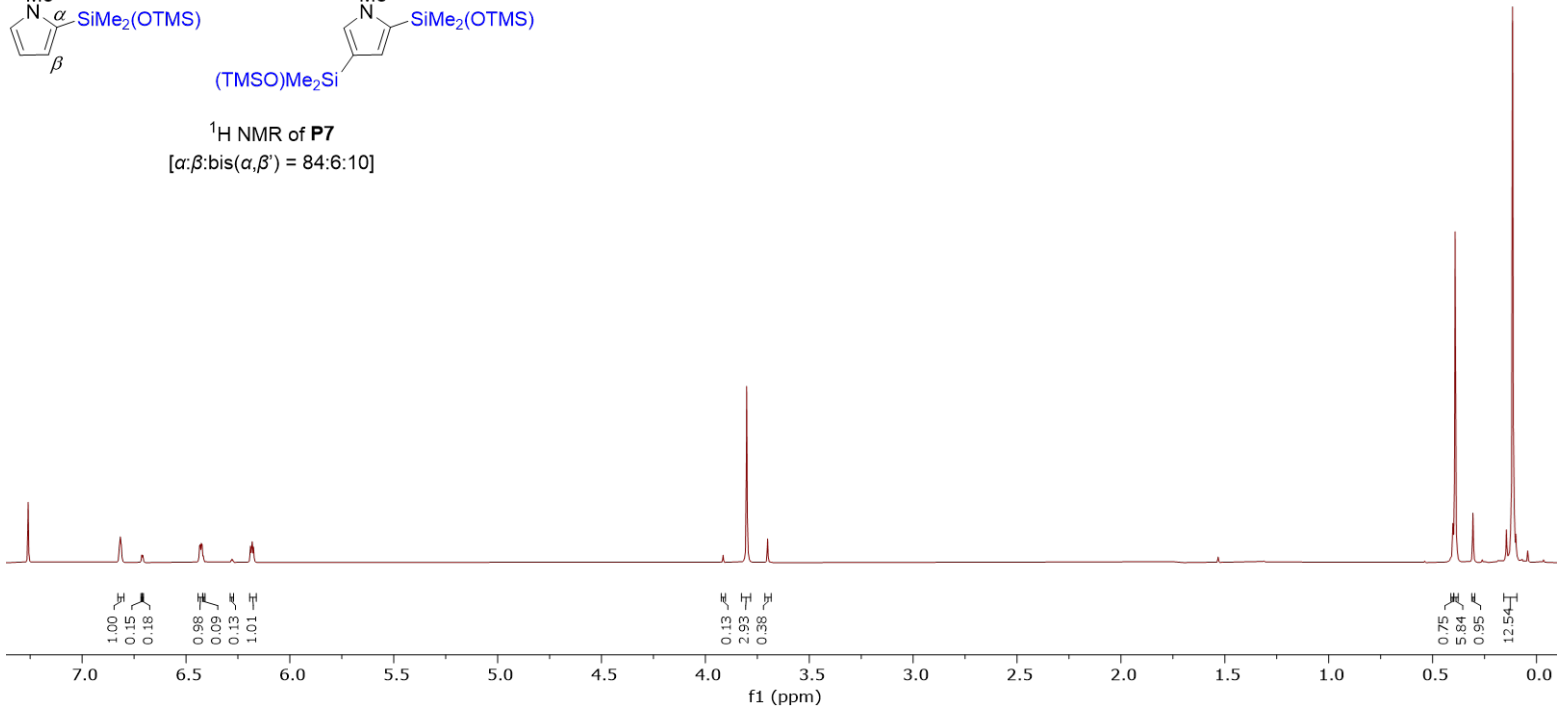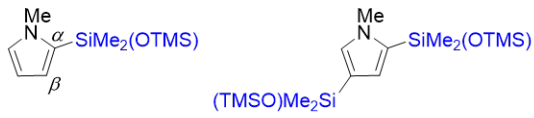

<sup>13</sup>C NMR of **P7**  
 [α:β:bis(α,β') = 84:6:10]

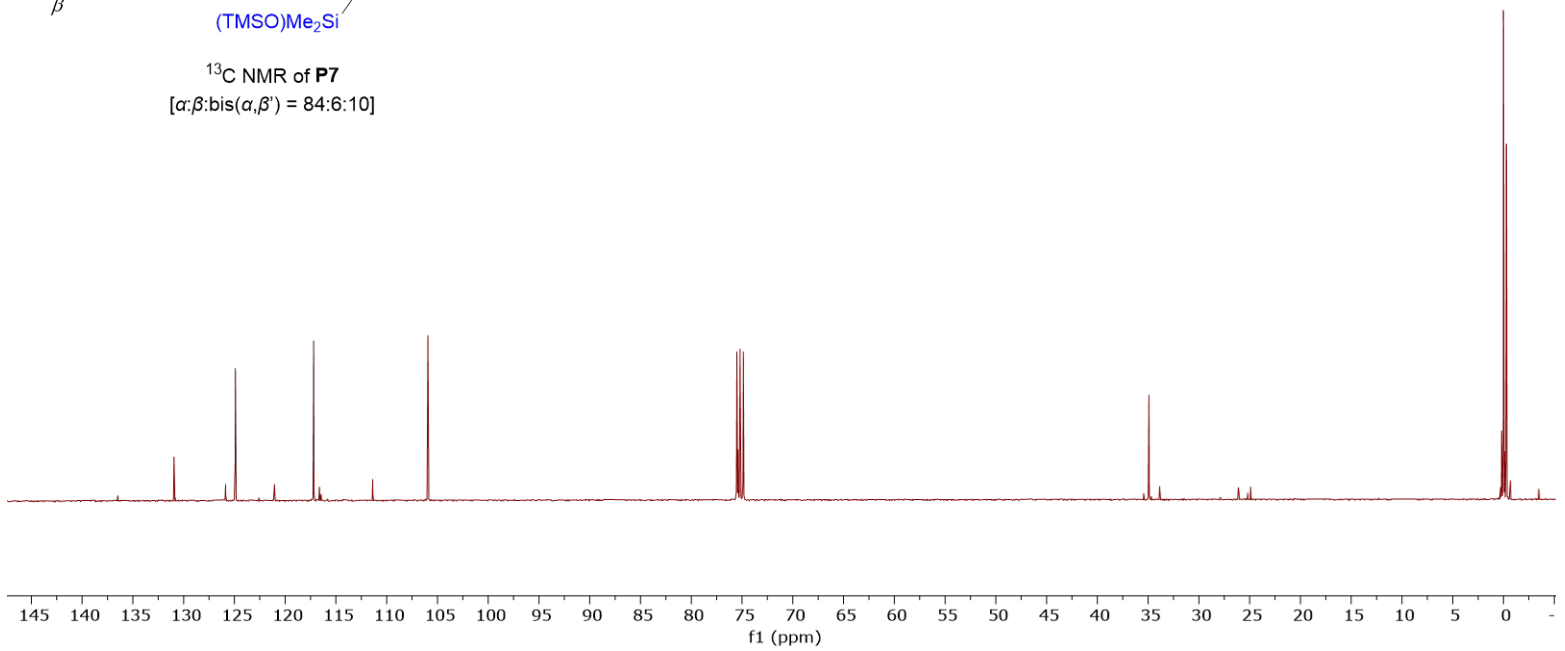

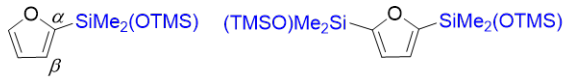

<sup>1</sup>H NMR of P8  
 [α:β:bis(α,α') = 80:2:18]

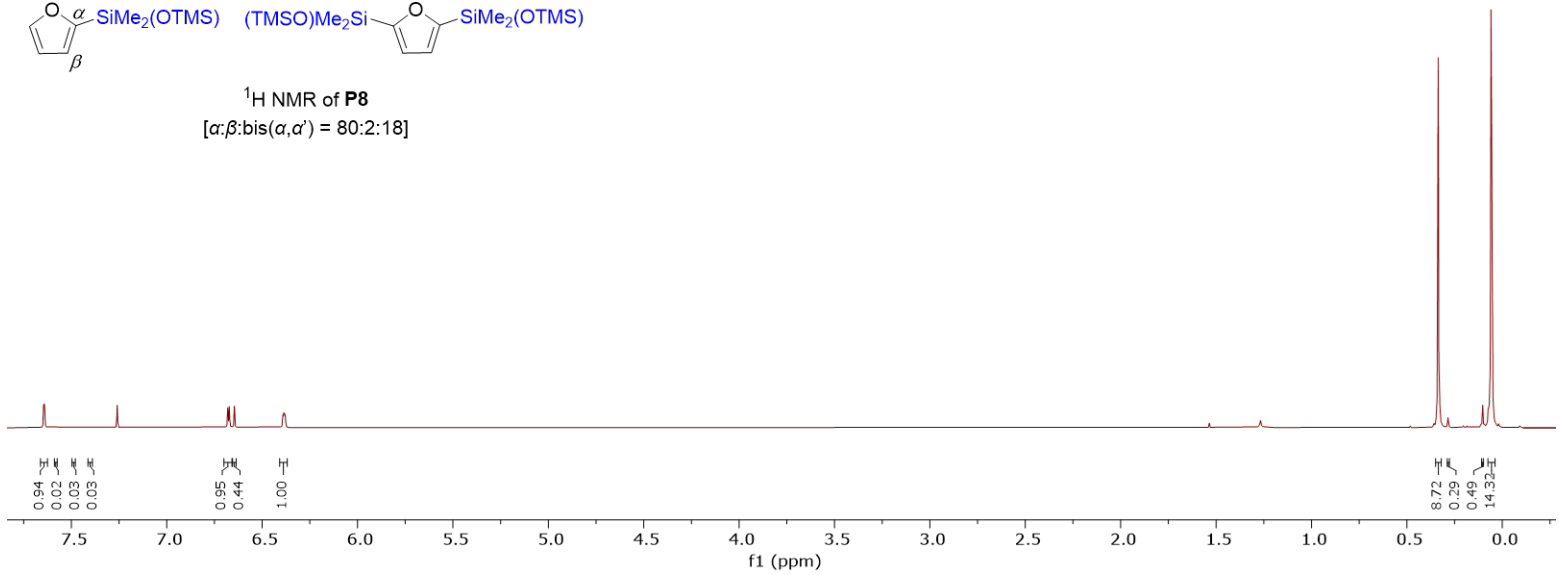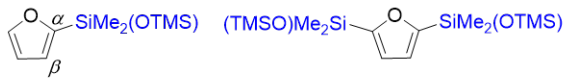

<sup>13</sup>C NMR of P8  
 [α:β:bis(α,α') = 80:2:18]

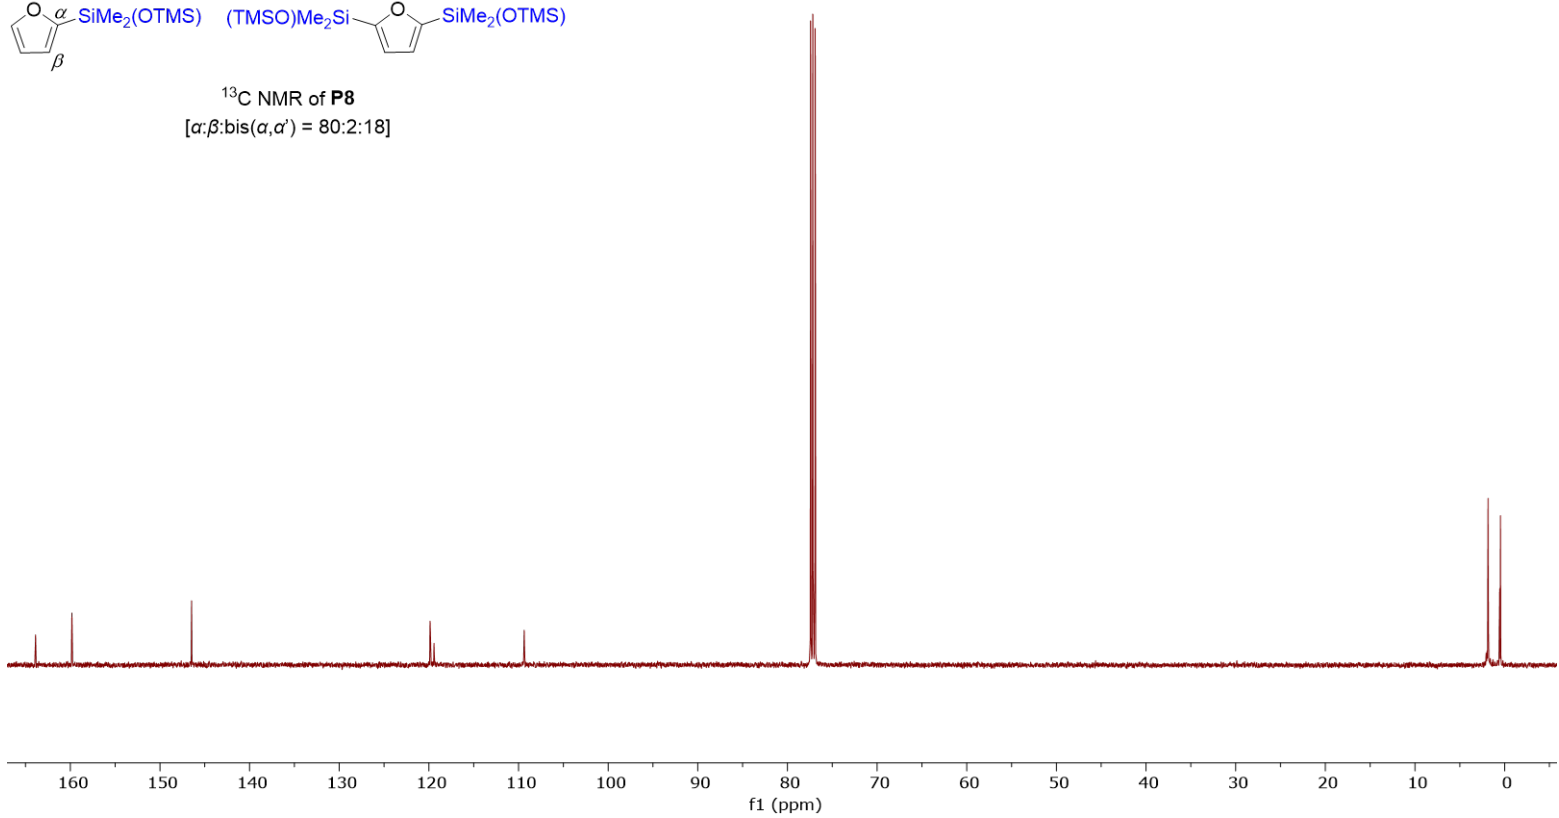

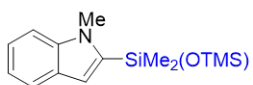

<sup>1</sup>H NMR of P11

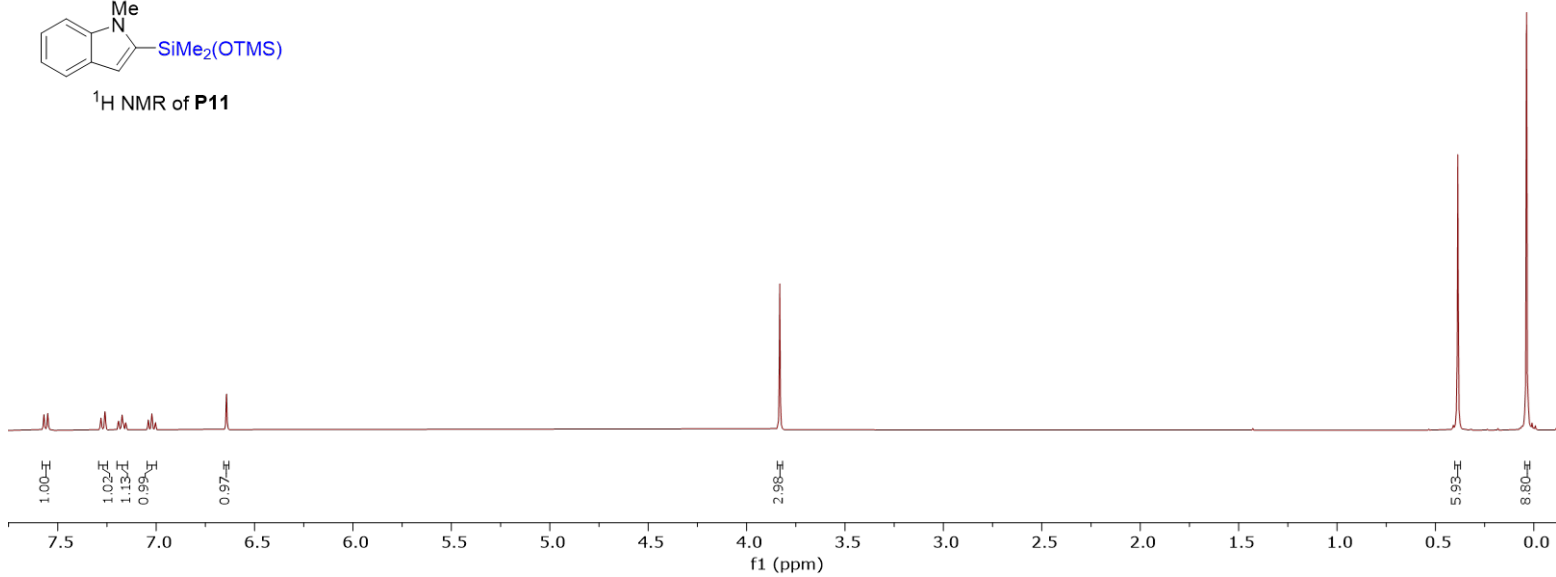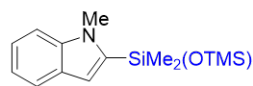

<sup>13</sup>C NMR of P11

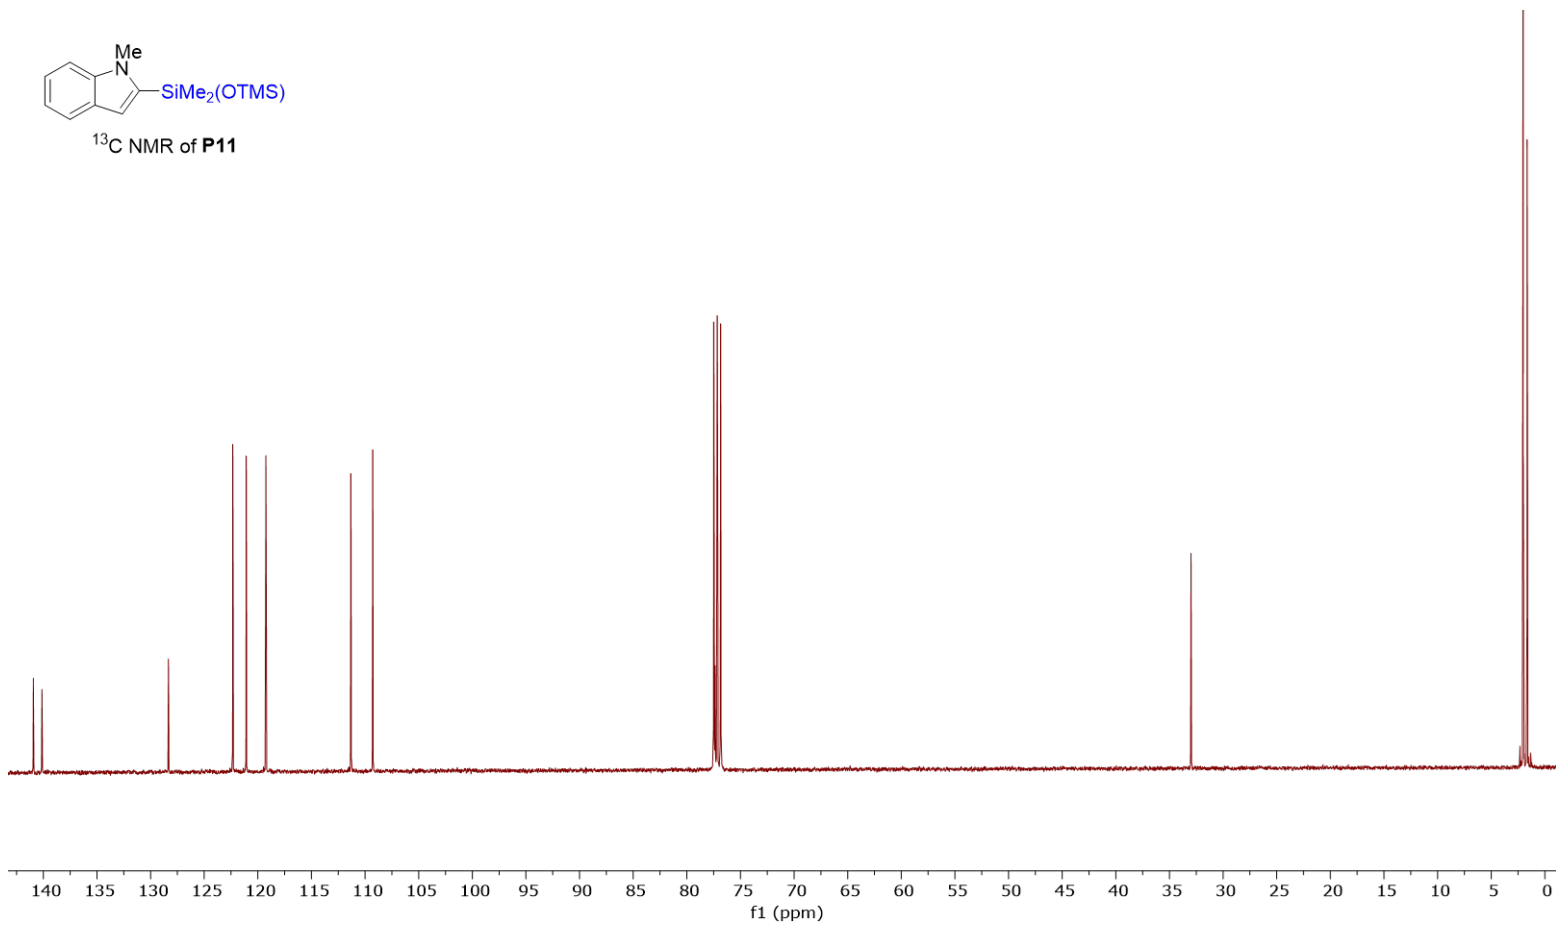

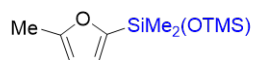

<sup>1</sup>H NMR of P9

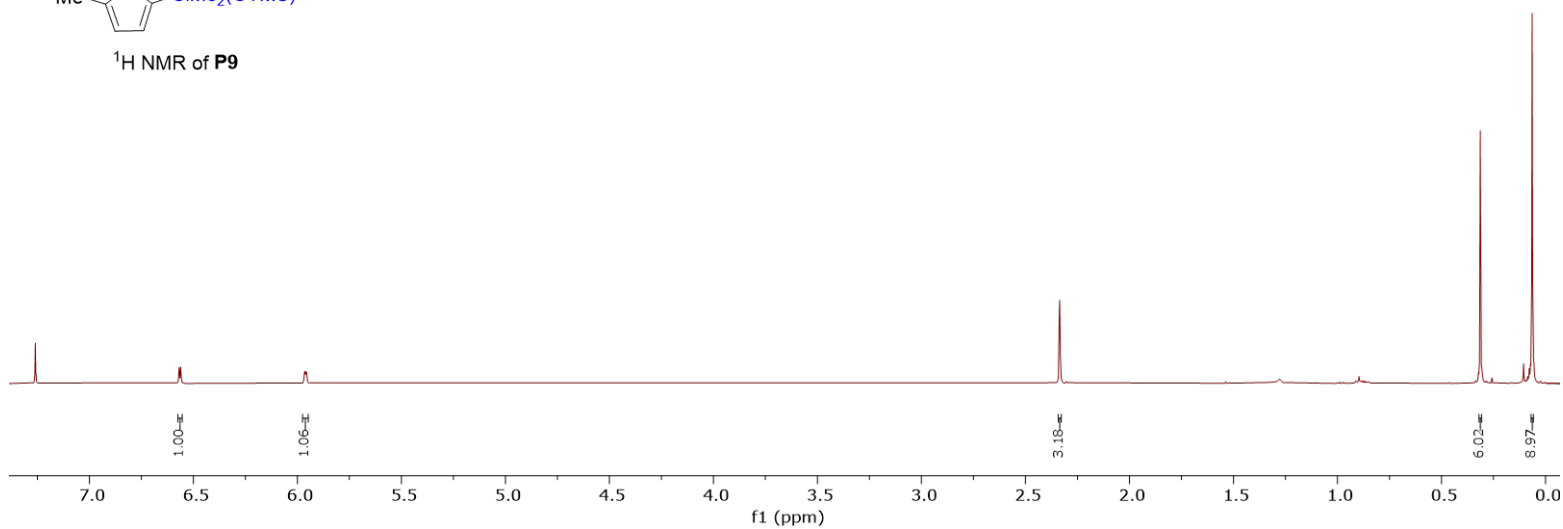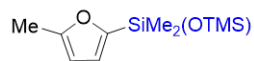

<sup>13</sup>C NMR of P9

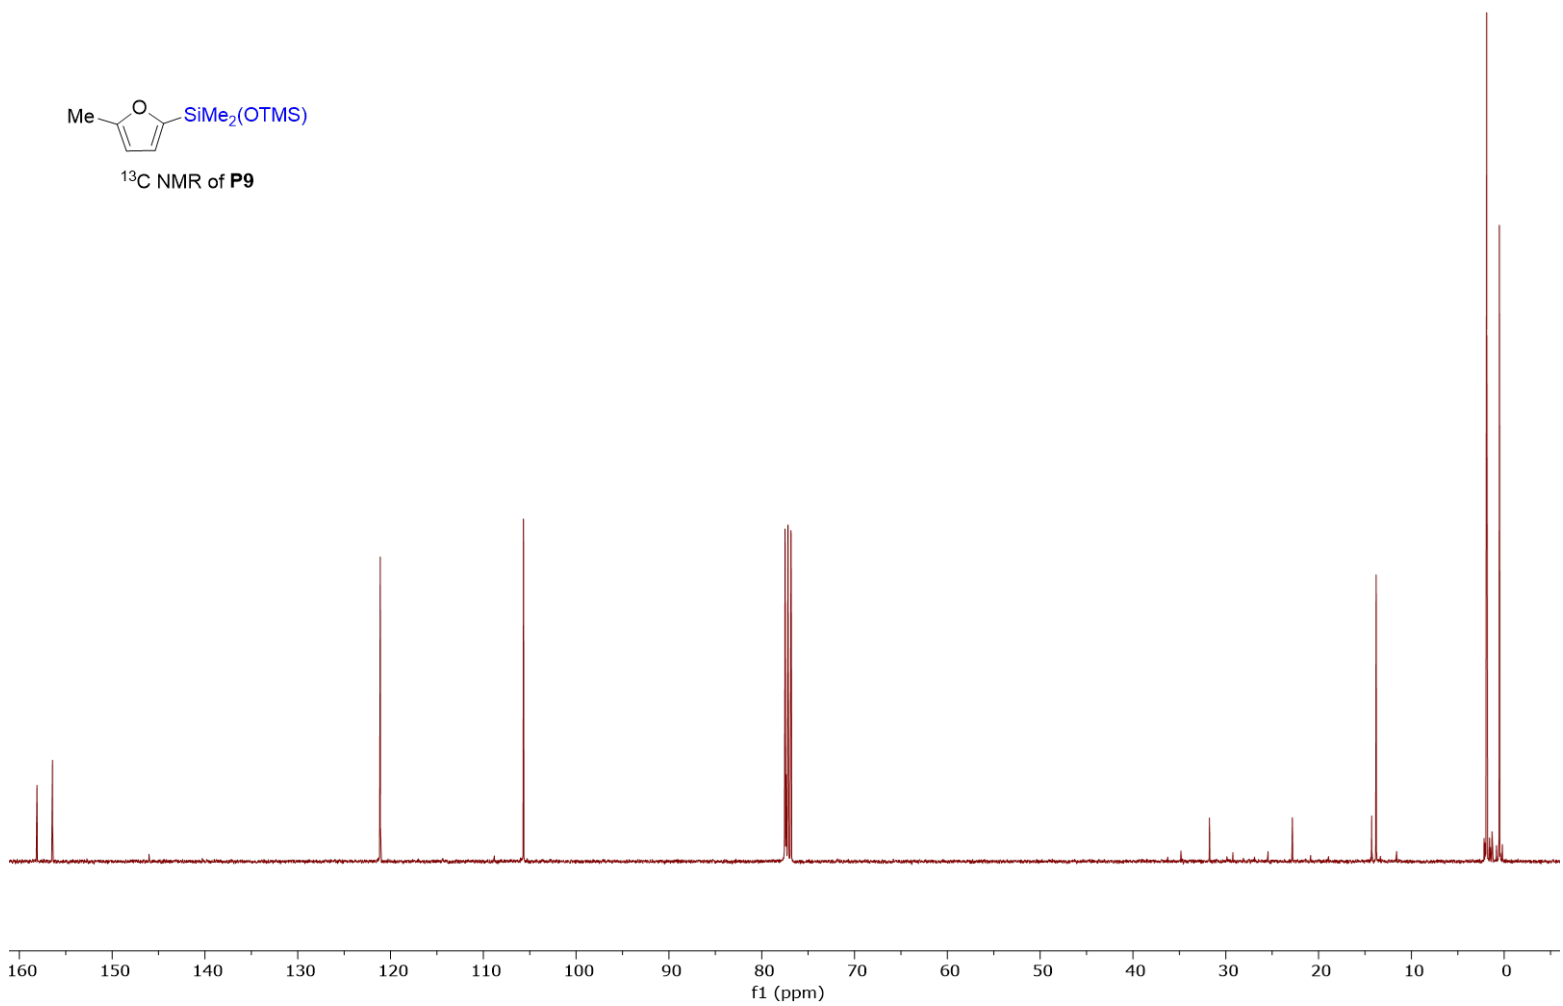





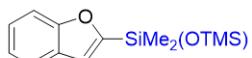

<sup>1</sup>H NMR of P12

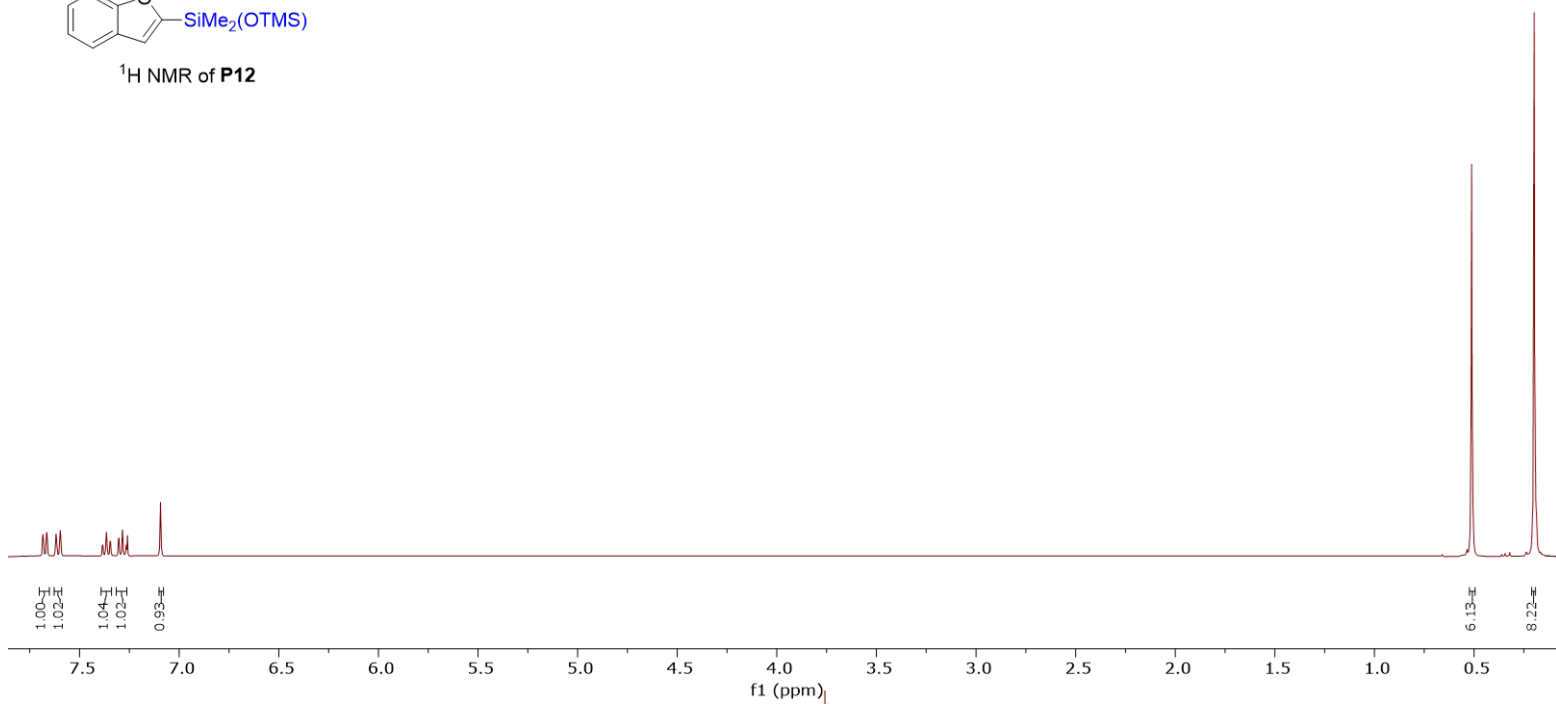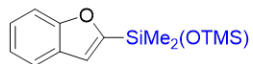

<sup>13</sup>C NMR of P12

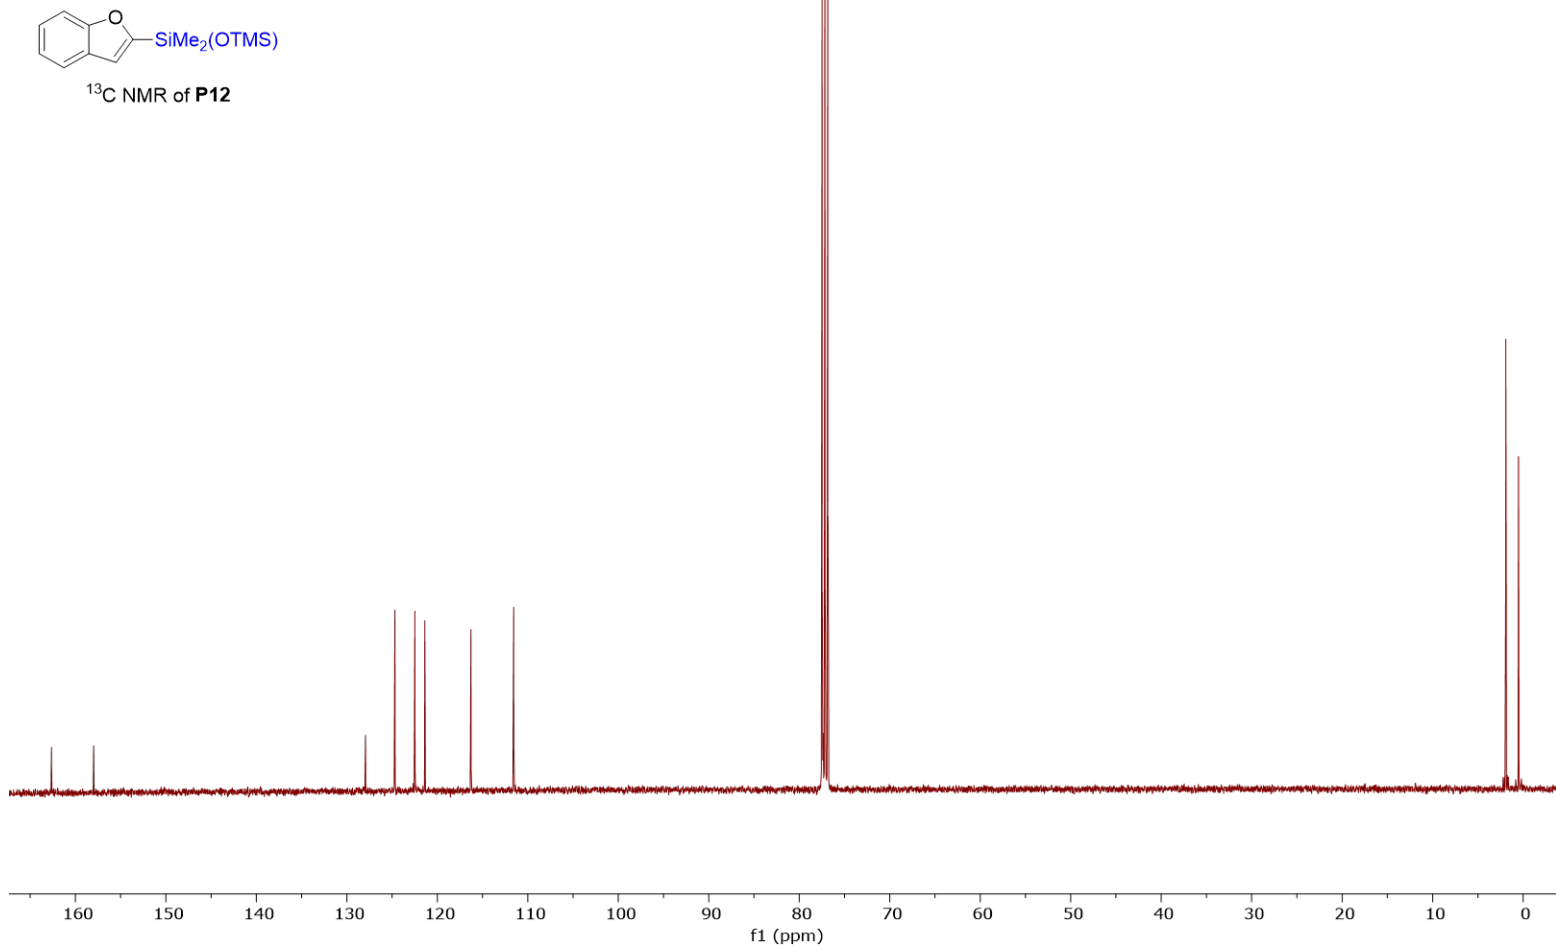

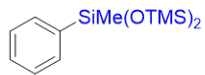

<sup>1</sup>H NMR of P13

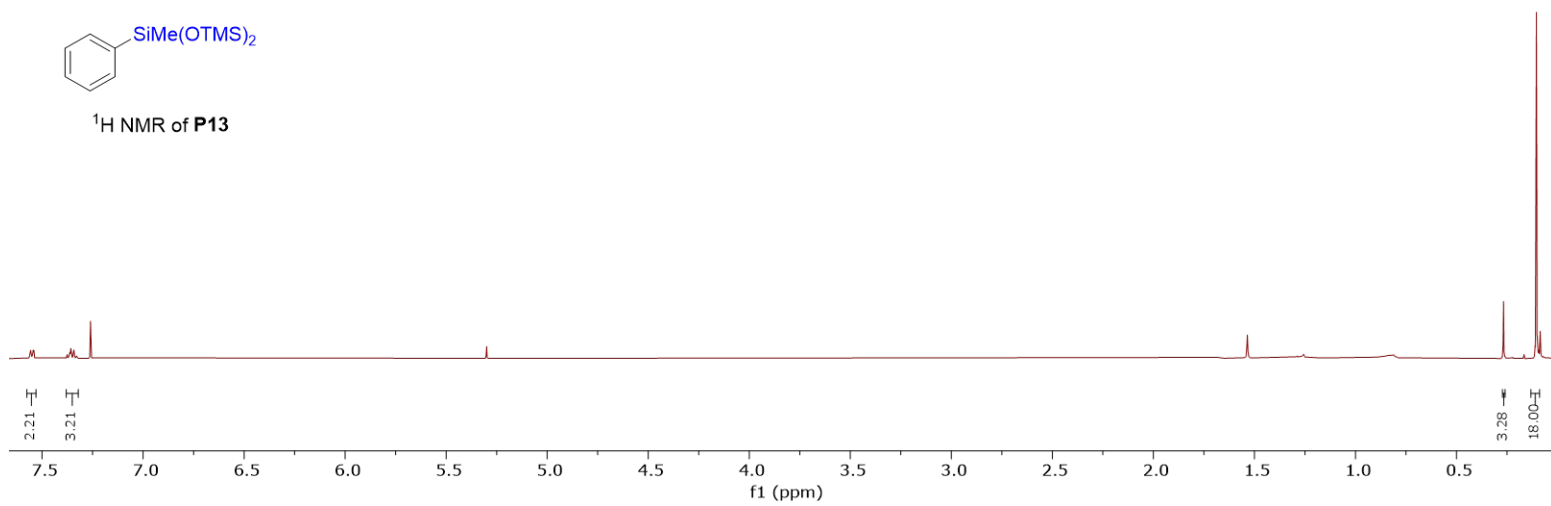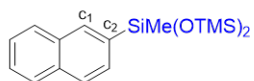

<sup>1</sup>H NMR of P14  
[c<sub>1</sub>:c<sub>2</sub> = 44:56]

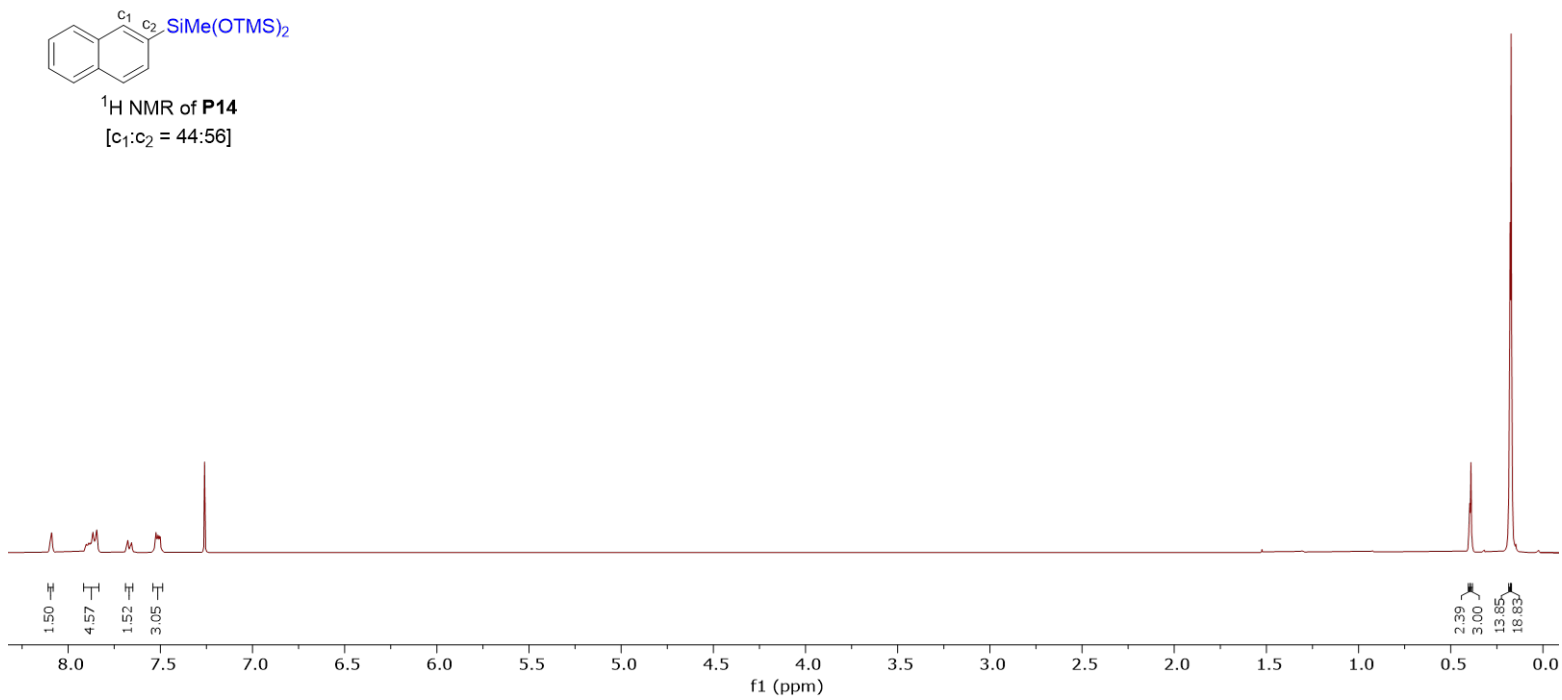





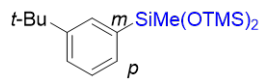

<sup>13</sup>C NMR of **P16**  
[*m*:*p* = 67:33]

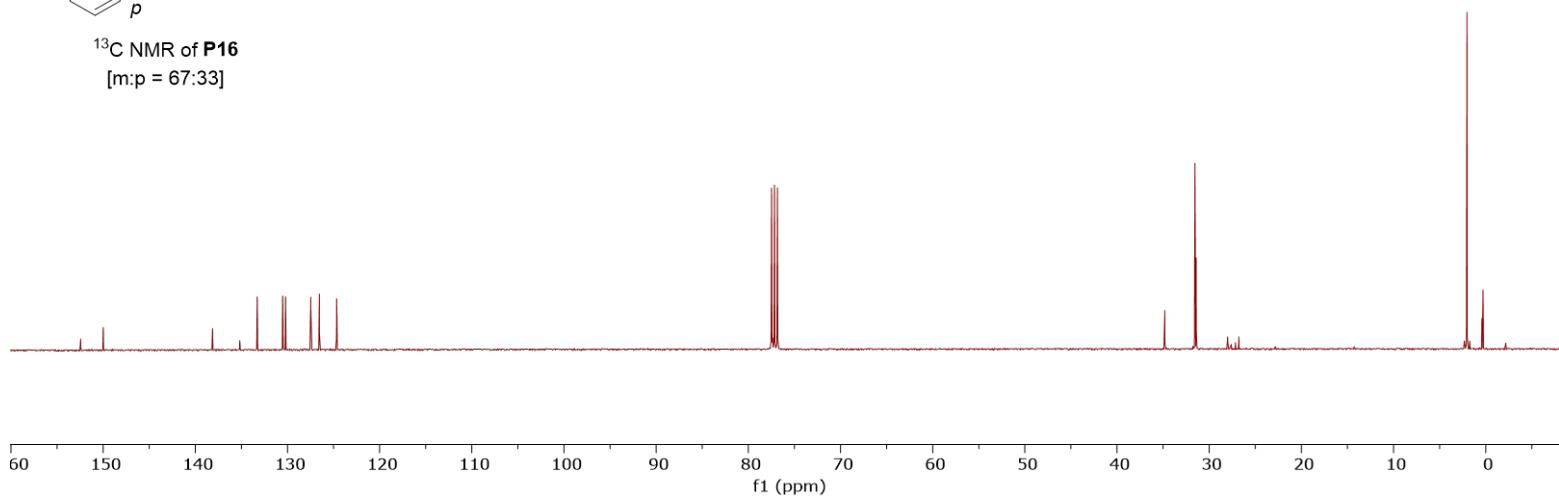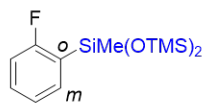

<sup>1</sup>H NMR of **P17**  
[*o*:*m*:*p* = 41:41:18]

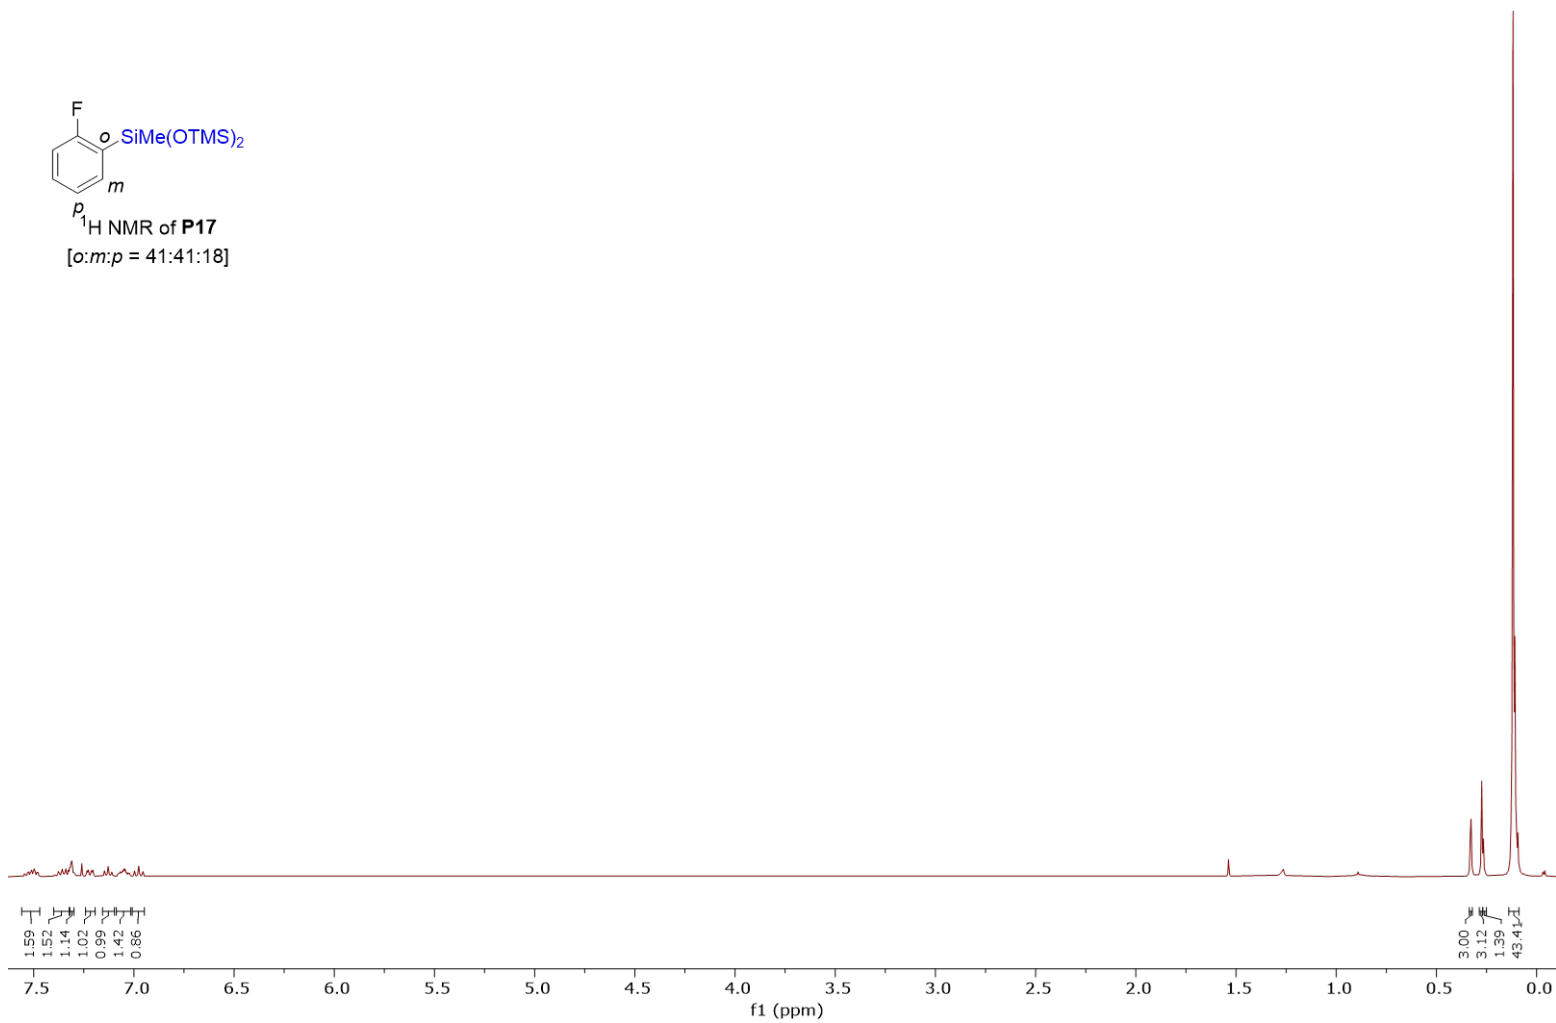

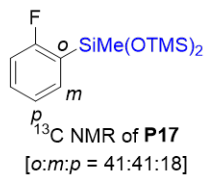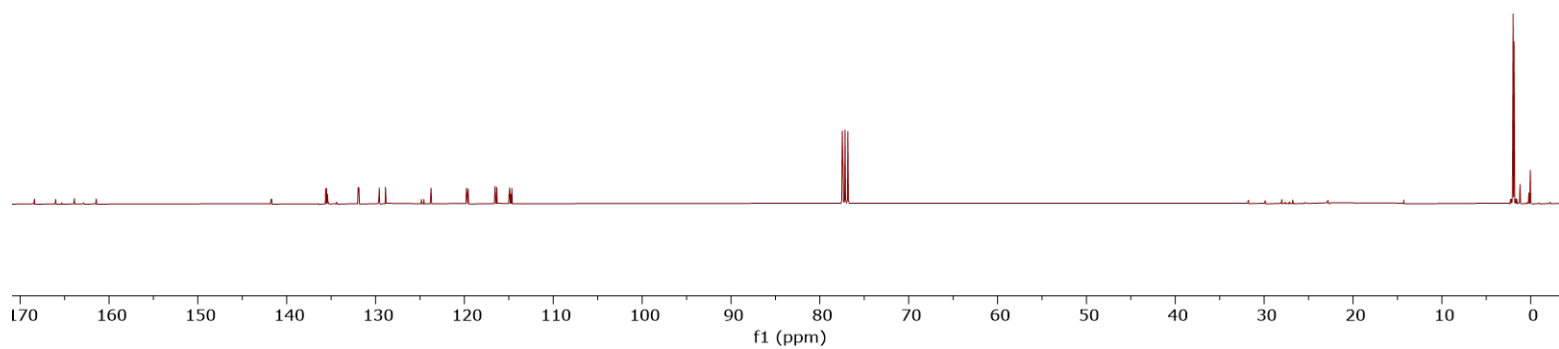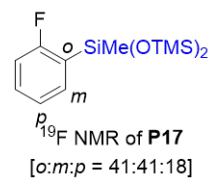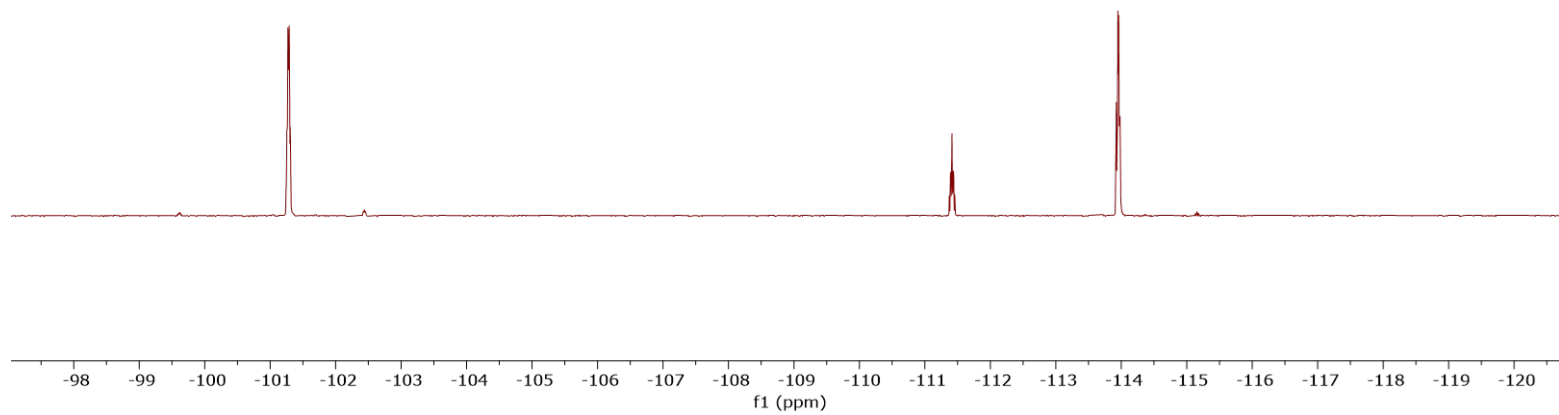

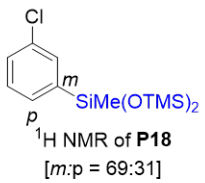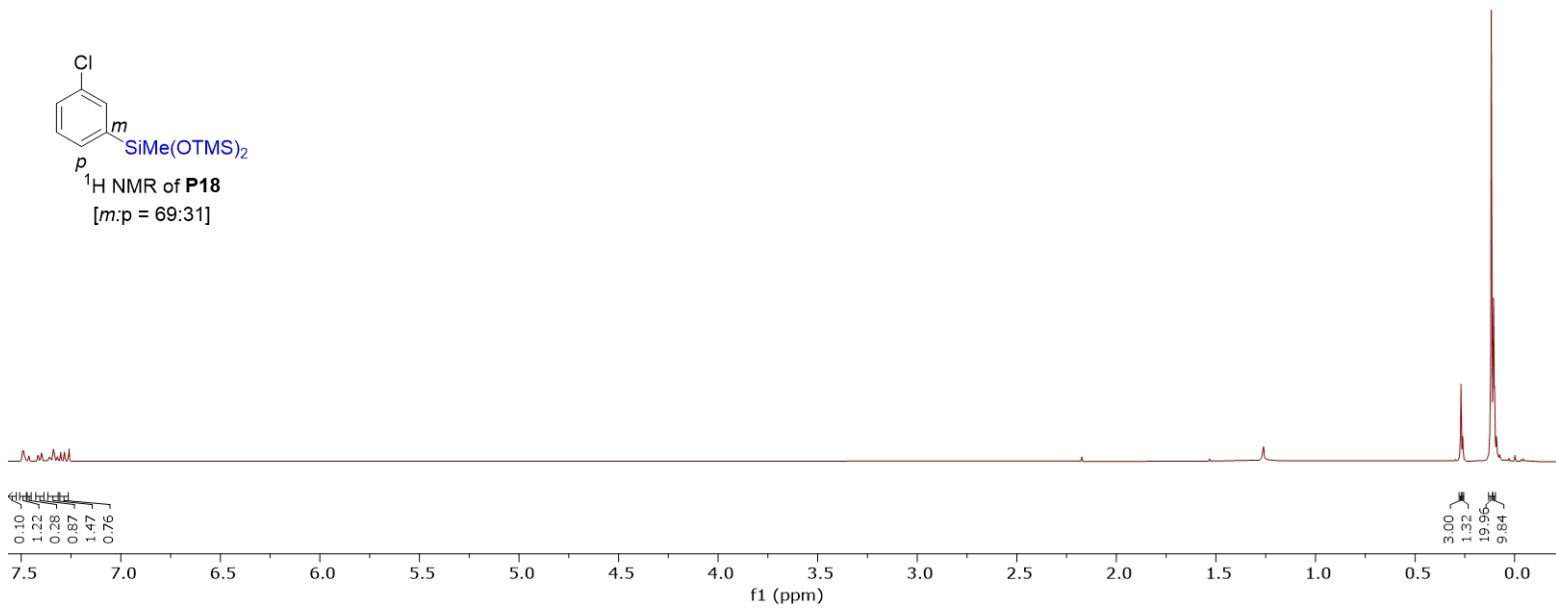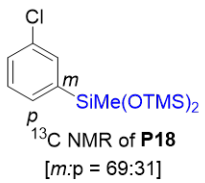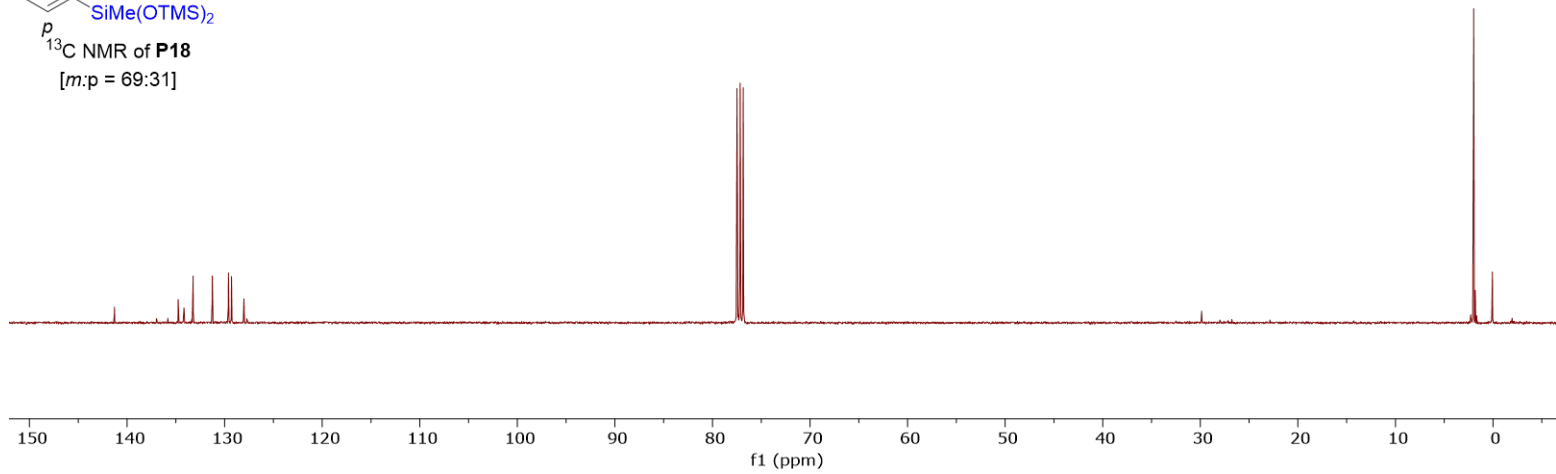

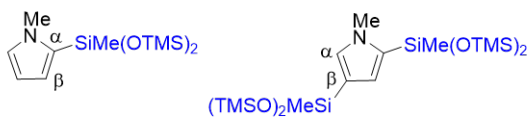

<sup>1</sup>H NMR of **P19**, **P36**, **P37**

[ $\alpha$ : $\beta$ : bis( $\alpha$ , $\alpha'$ ): bis( $\alpha$ , $\beta'$ ) = 23:2:60:15]

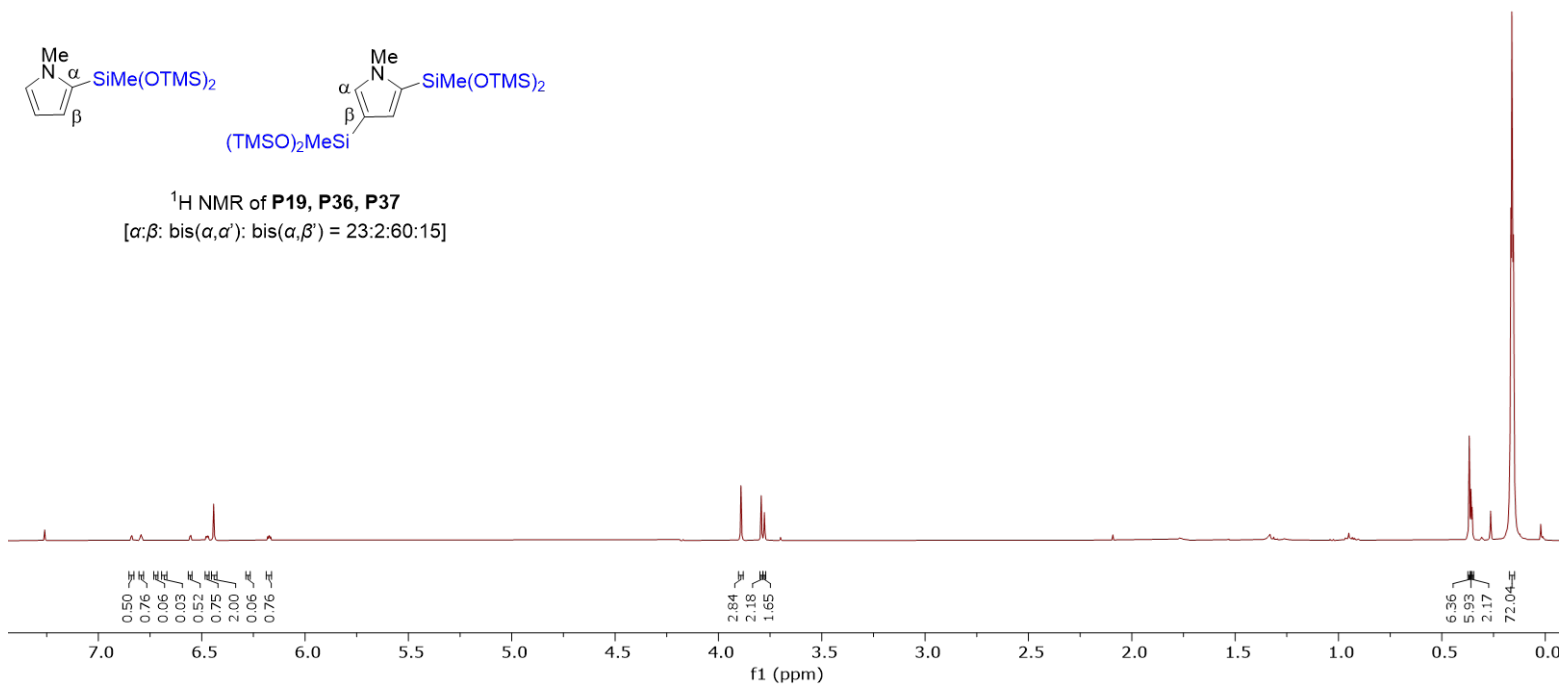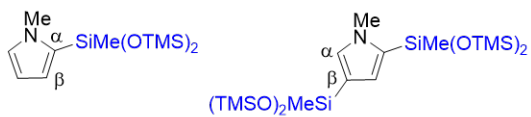

<sup>13</sup>C NMR of **P19**, **P36**, **P37**

[ $\alpha$ : $\beta$ : bis( $\alpha$ , $\alpha'$ ): bis( $\alpha$ , $\beta'$ ) = 23:2:60:15]

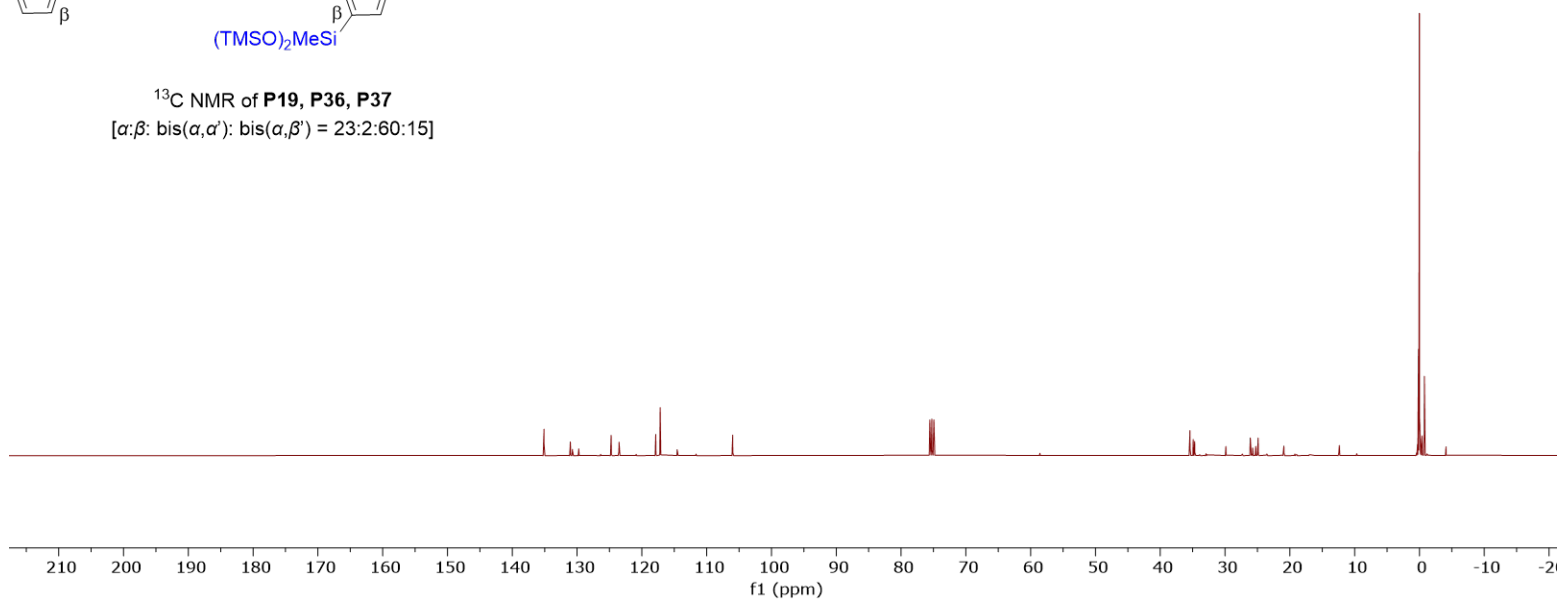



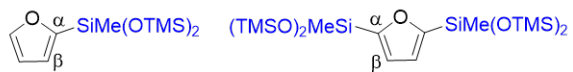

<sup>1</sup>H NMR of **P20**, **P34**, **P35**  
 [ $\alpha$ : $\beta$ :bis( $\alpha$ , $\alpha'$ ): bis( $\alpha$ , $\beta'$ ) = 65:2:5:28]

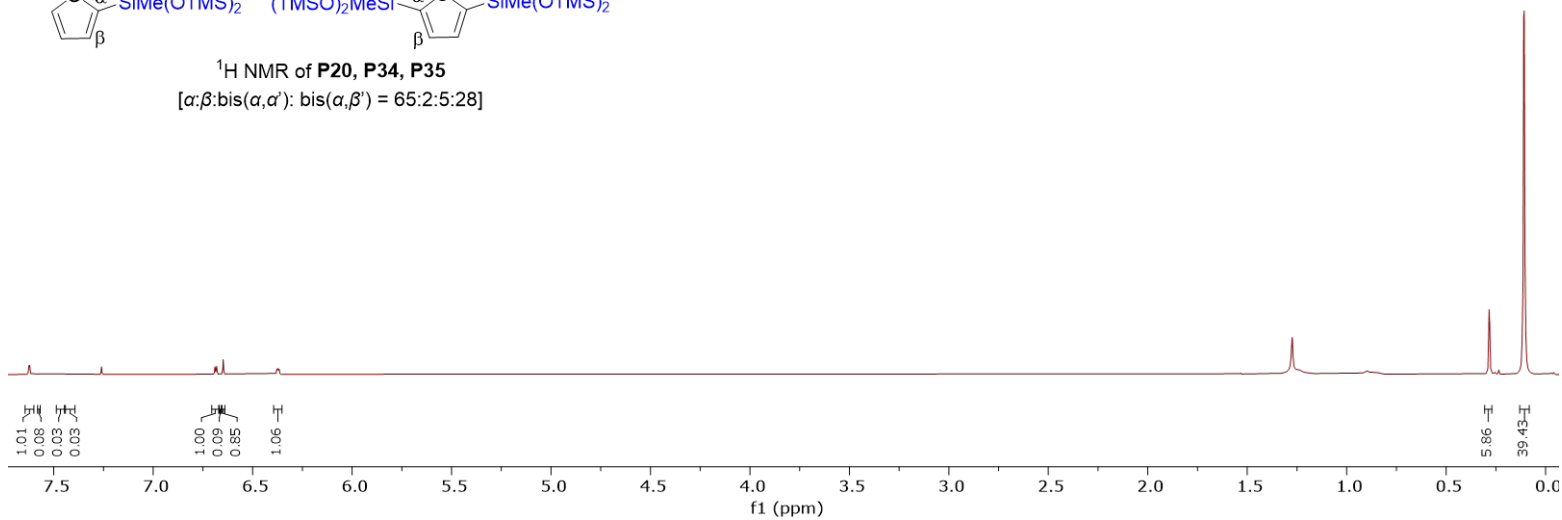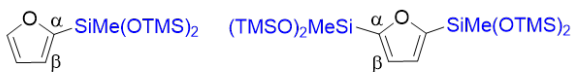

<sup>13</sup>C NMR of **P20**, **P34**, **P35**  
 [ $\alpha$ : $\beta$ :bis( $\alpha$ , $\alpha'$ ): bis( $\alpha$ , $\beta'$ ) = 65:2:5:28]

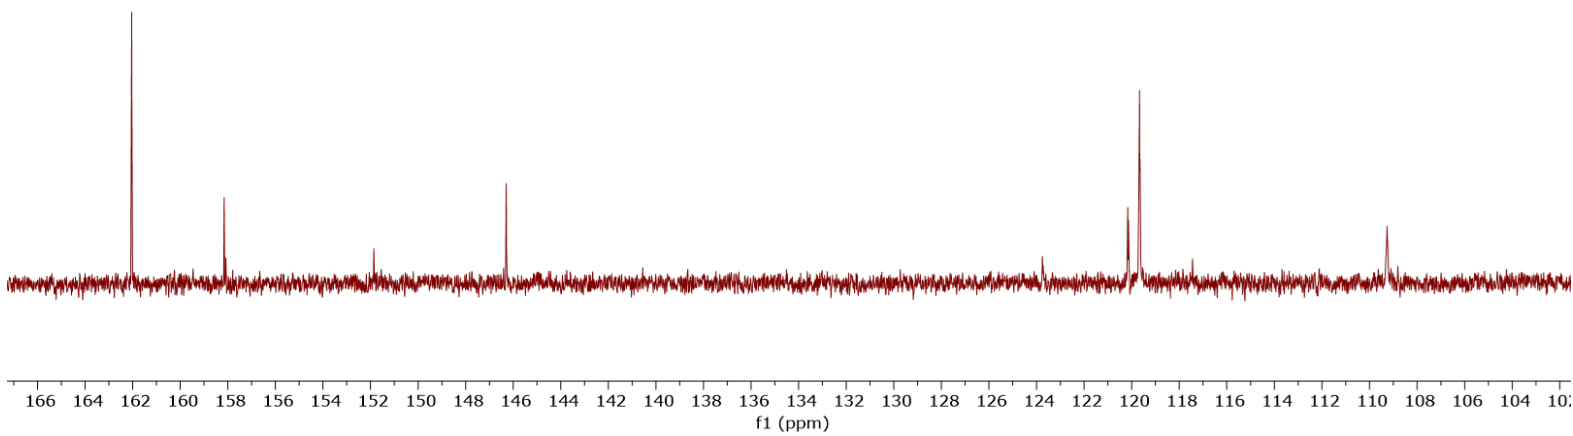

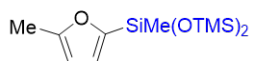

<sup>1</sup>H NMR of P21

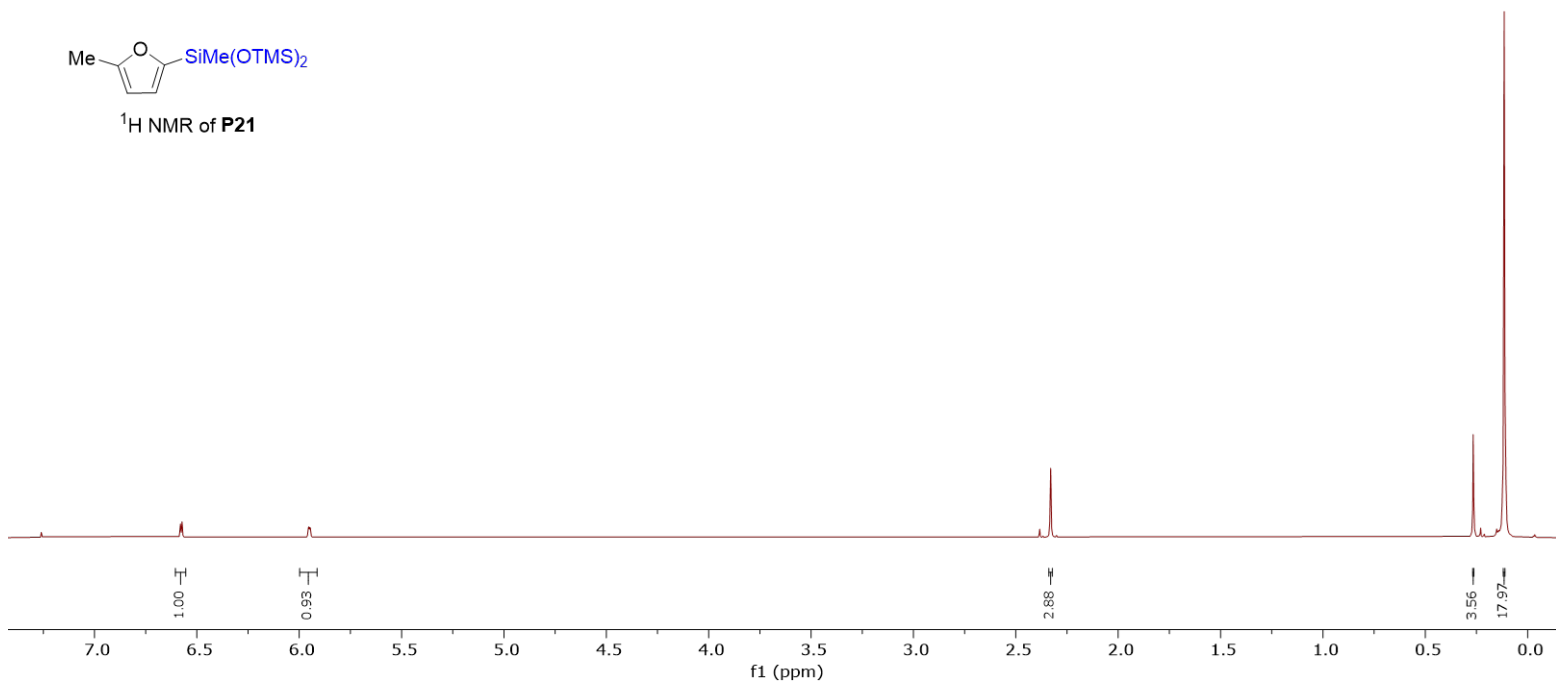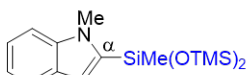

<sup>1</sup>H NMR of P22  
( $\alpha:\beta = 64:36$ )

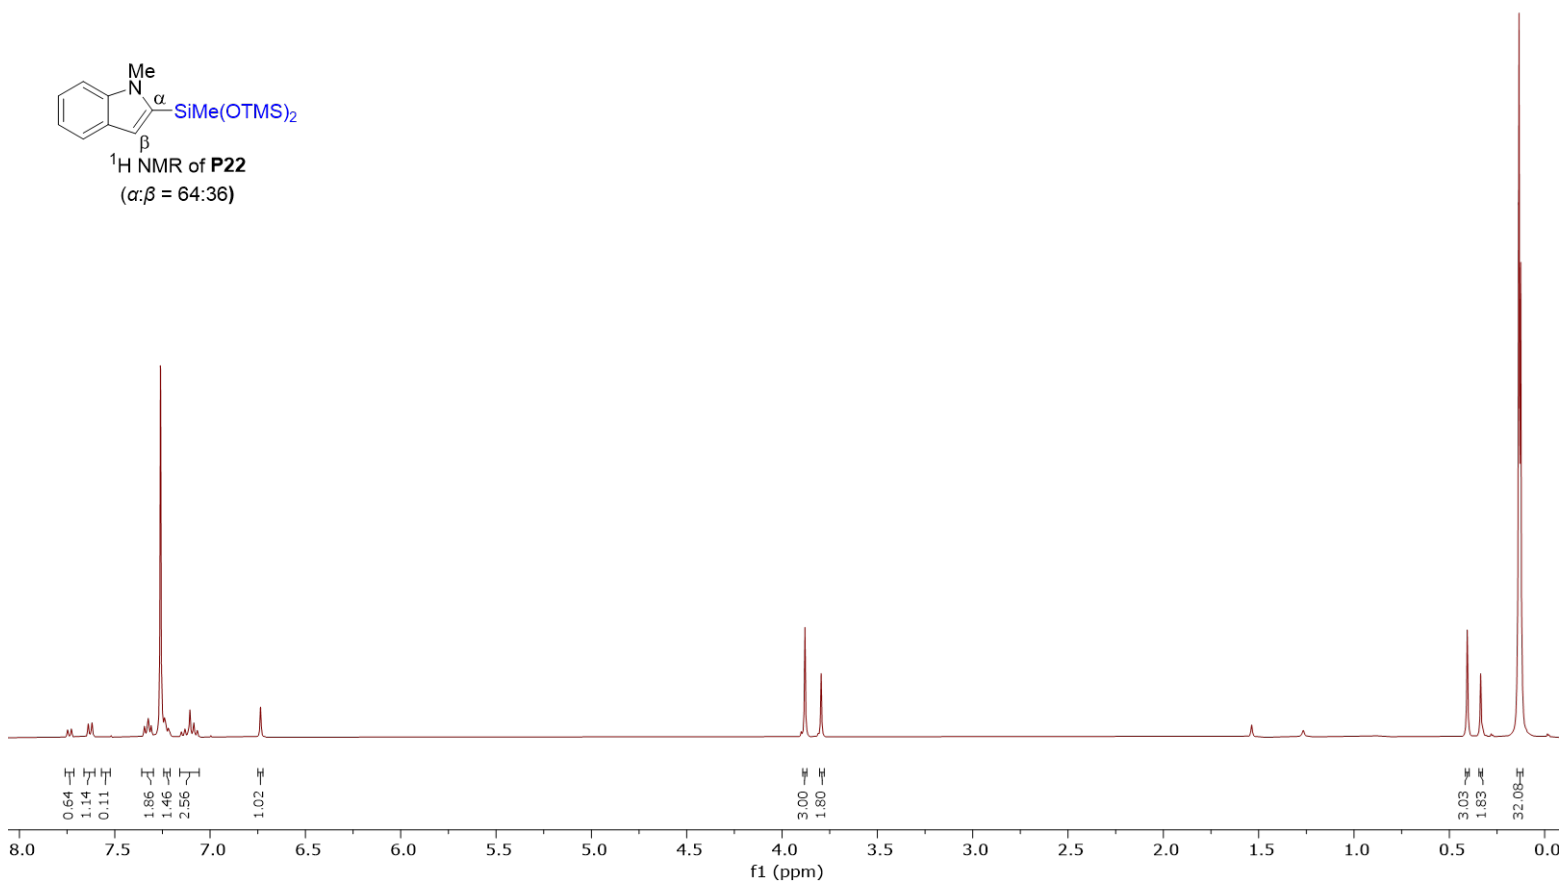

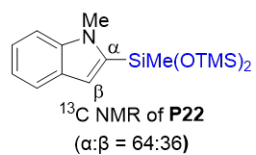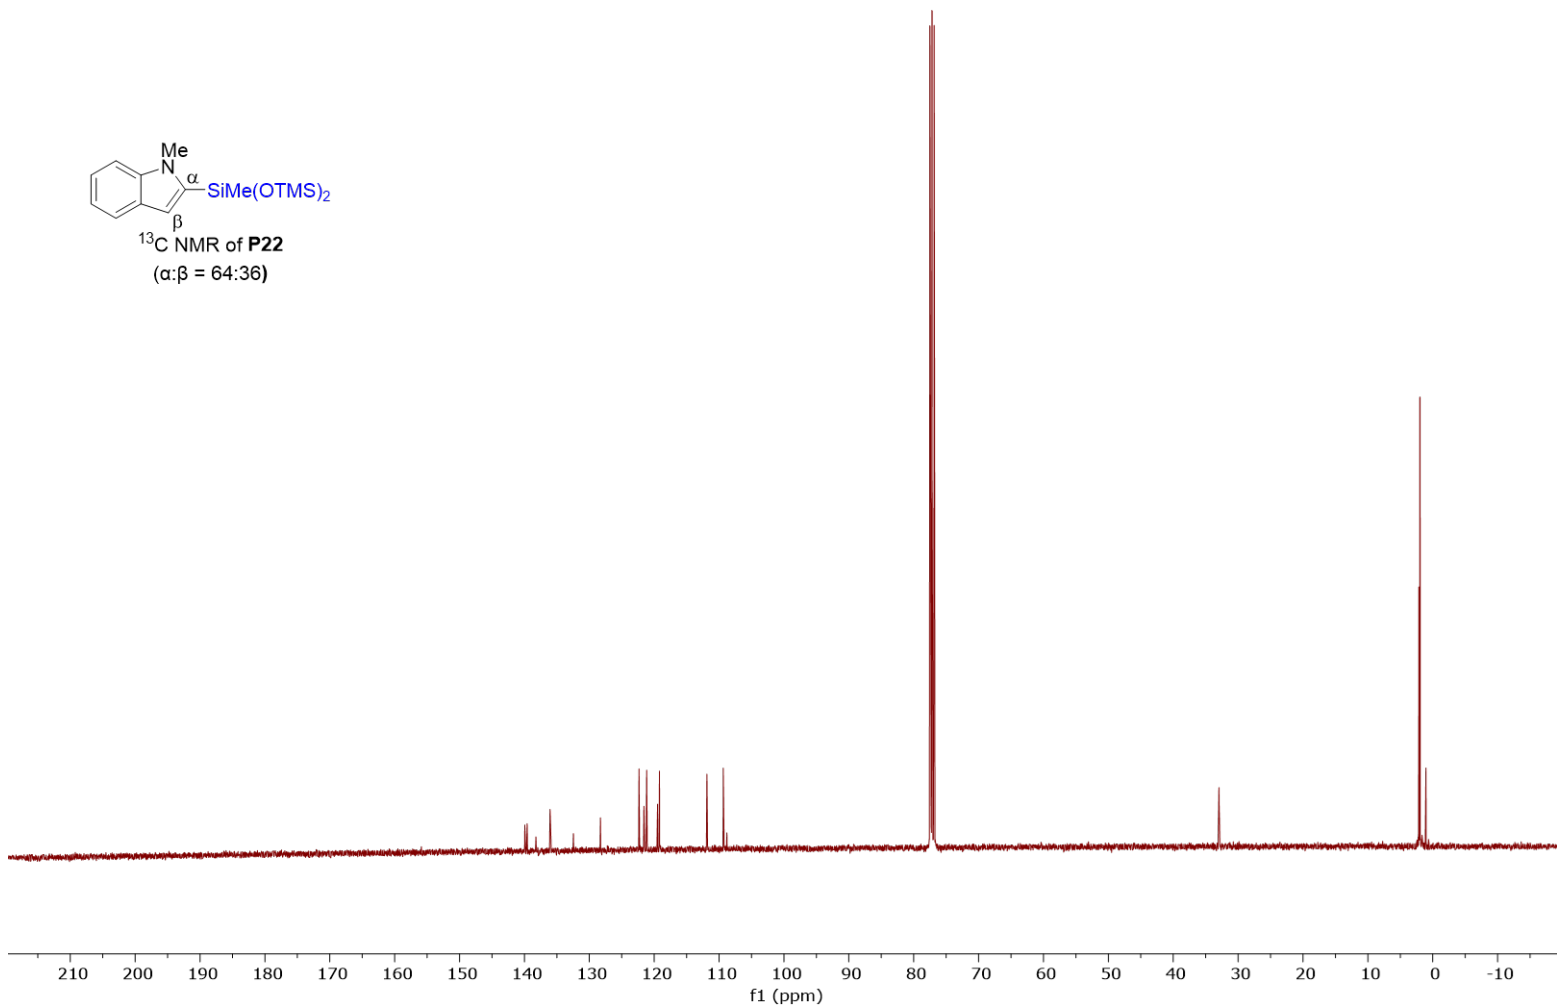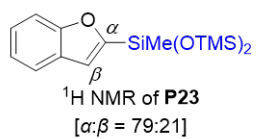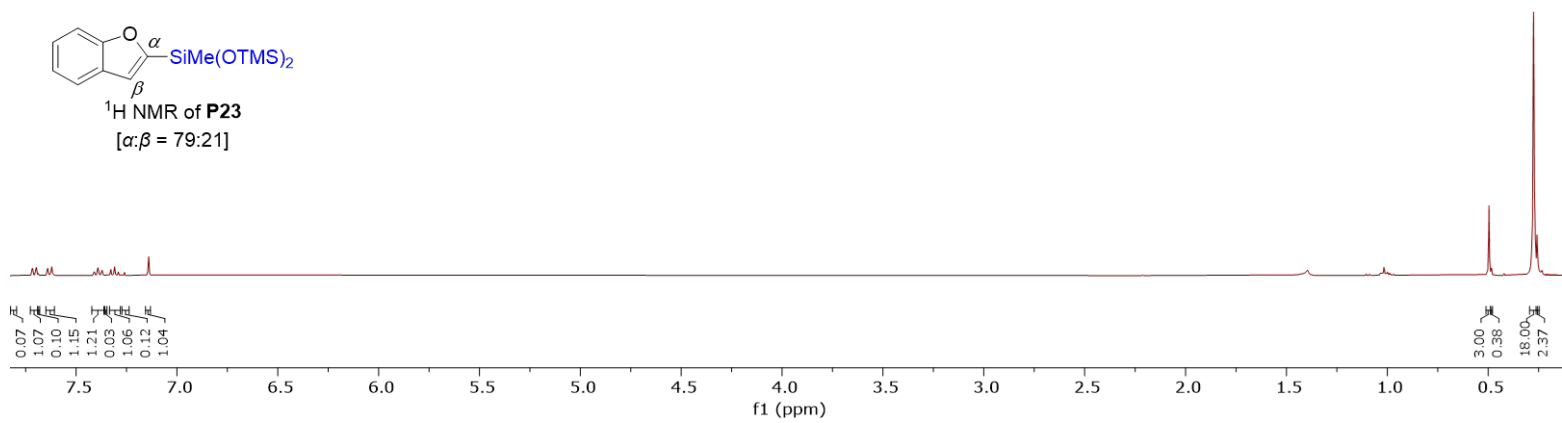

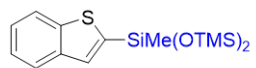

<sup>1</sup>H NMR of P24

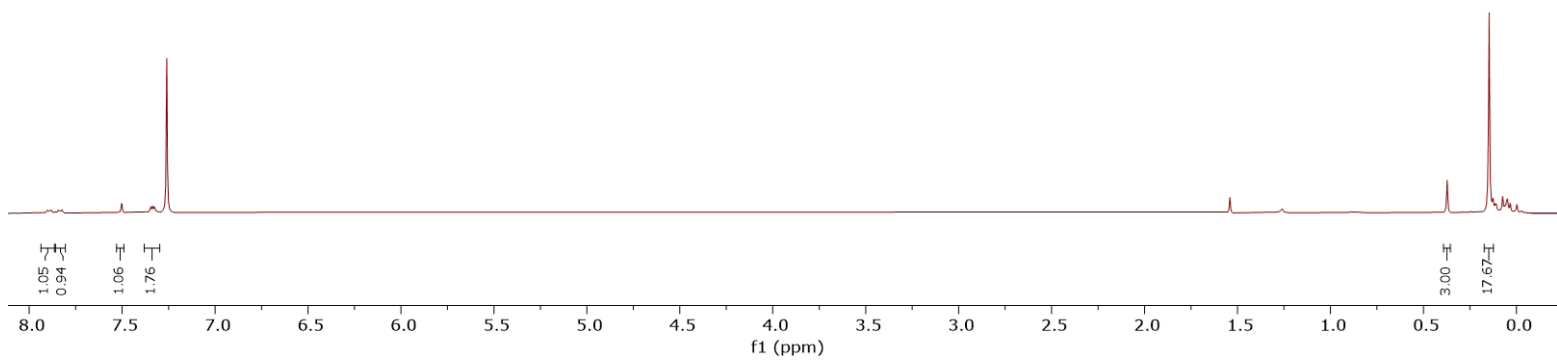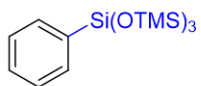

<sup>1</sup>H NMR of P25

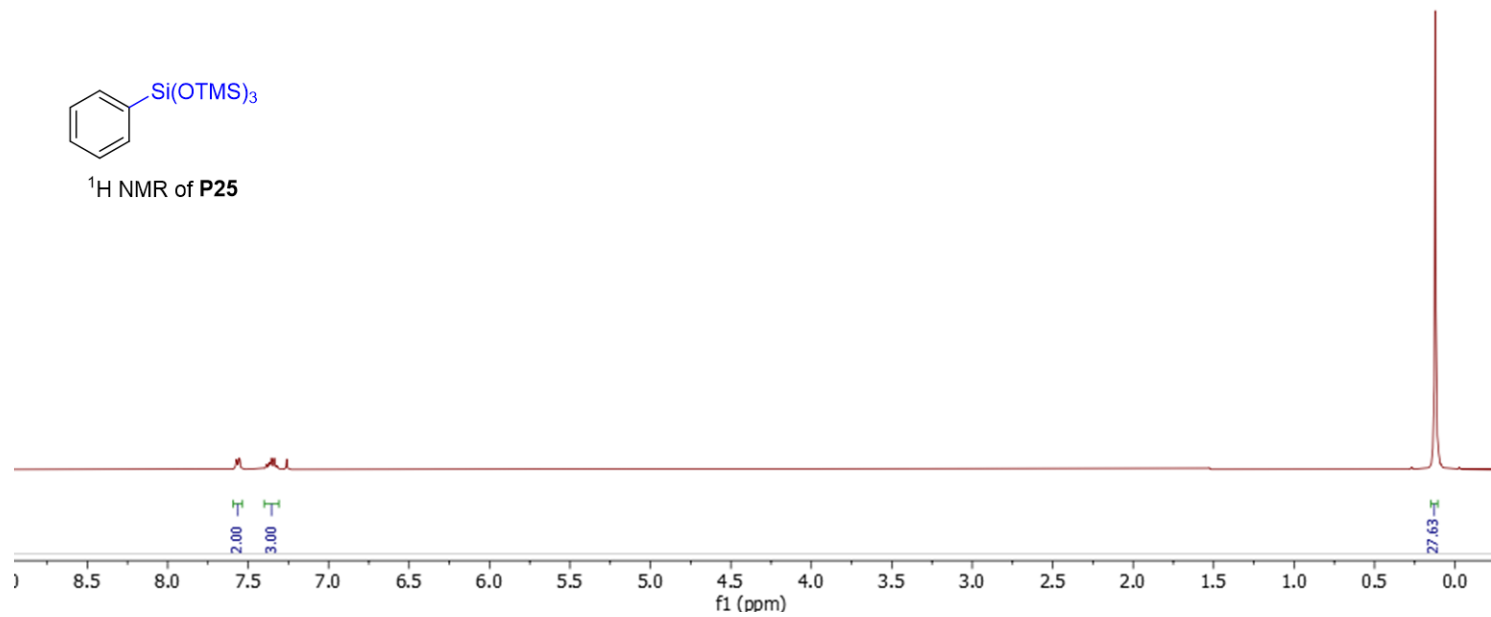

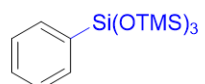

$^{13}\text{C}$  NMR of **P25**

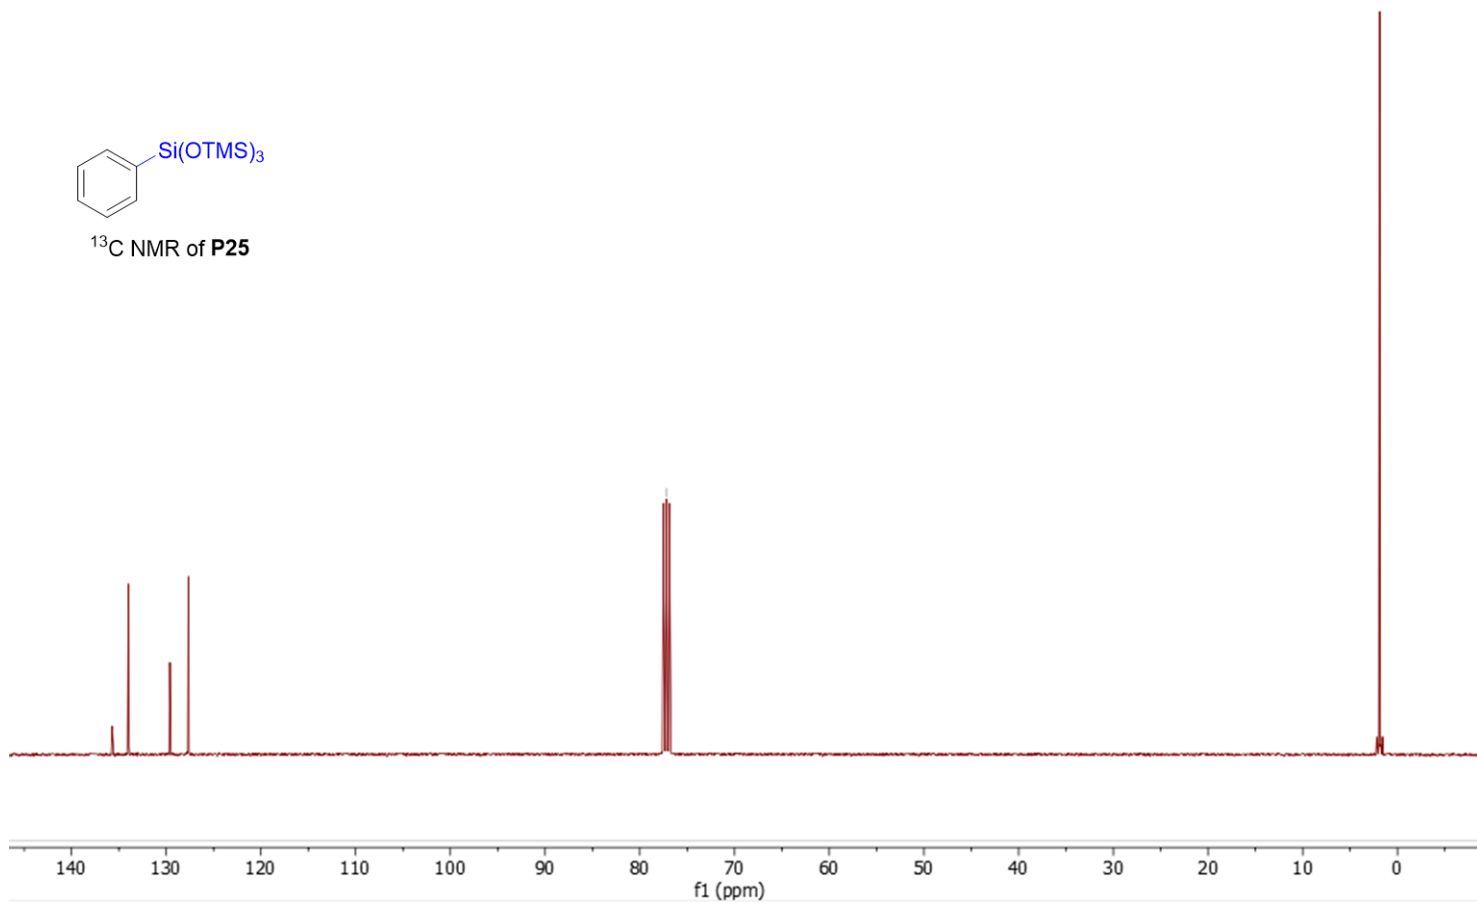

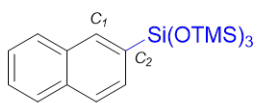

<sup>1</sup>H NMR of P26  
[c<sub>1</sub>:c<sub>2</sub> = 37:63]

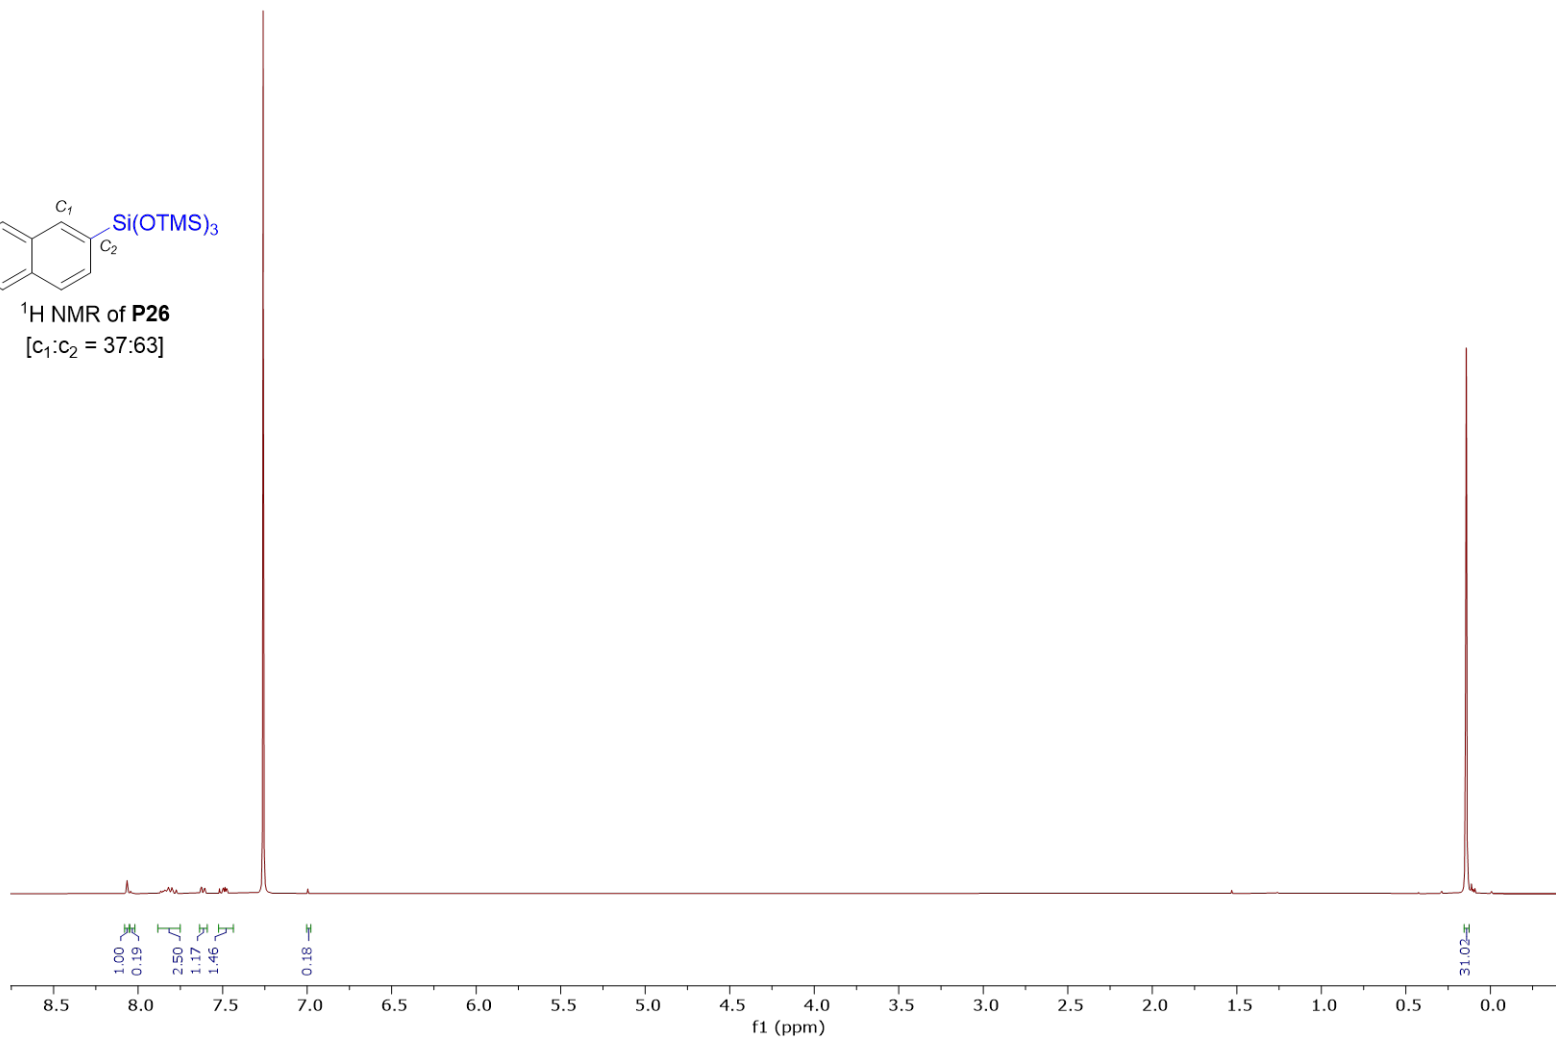

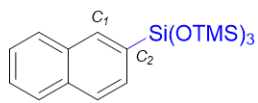

$^{13}\text{C}$  NMR of **P26**  
[ $\text{C}_1:\text{C}_2 = 37:63$ ]

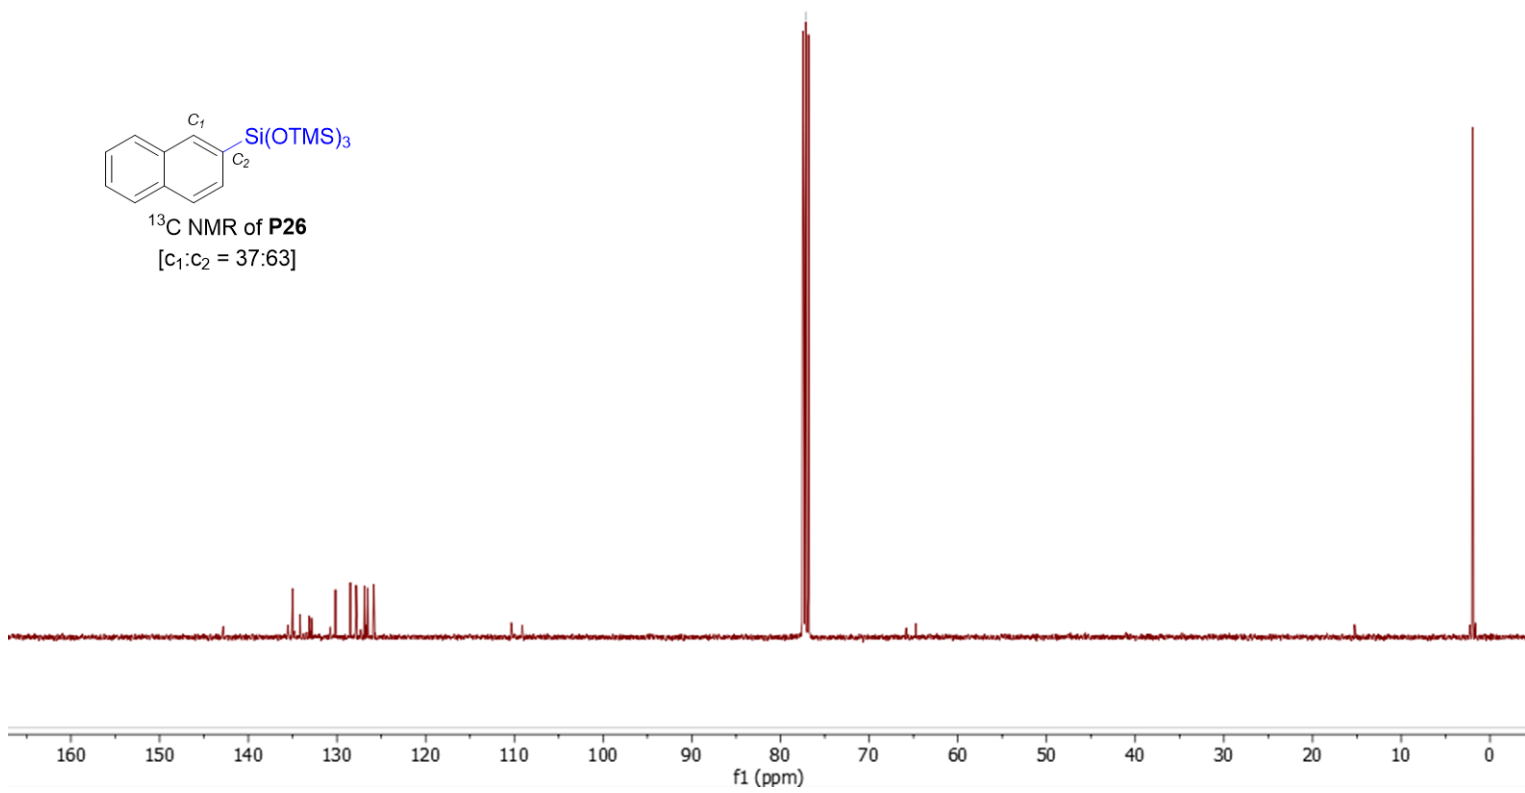

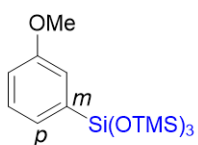

<sup>1</sup>H NMR for P27  
[m:p = 55:45]

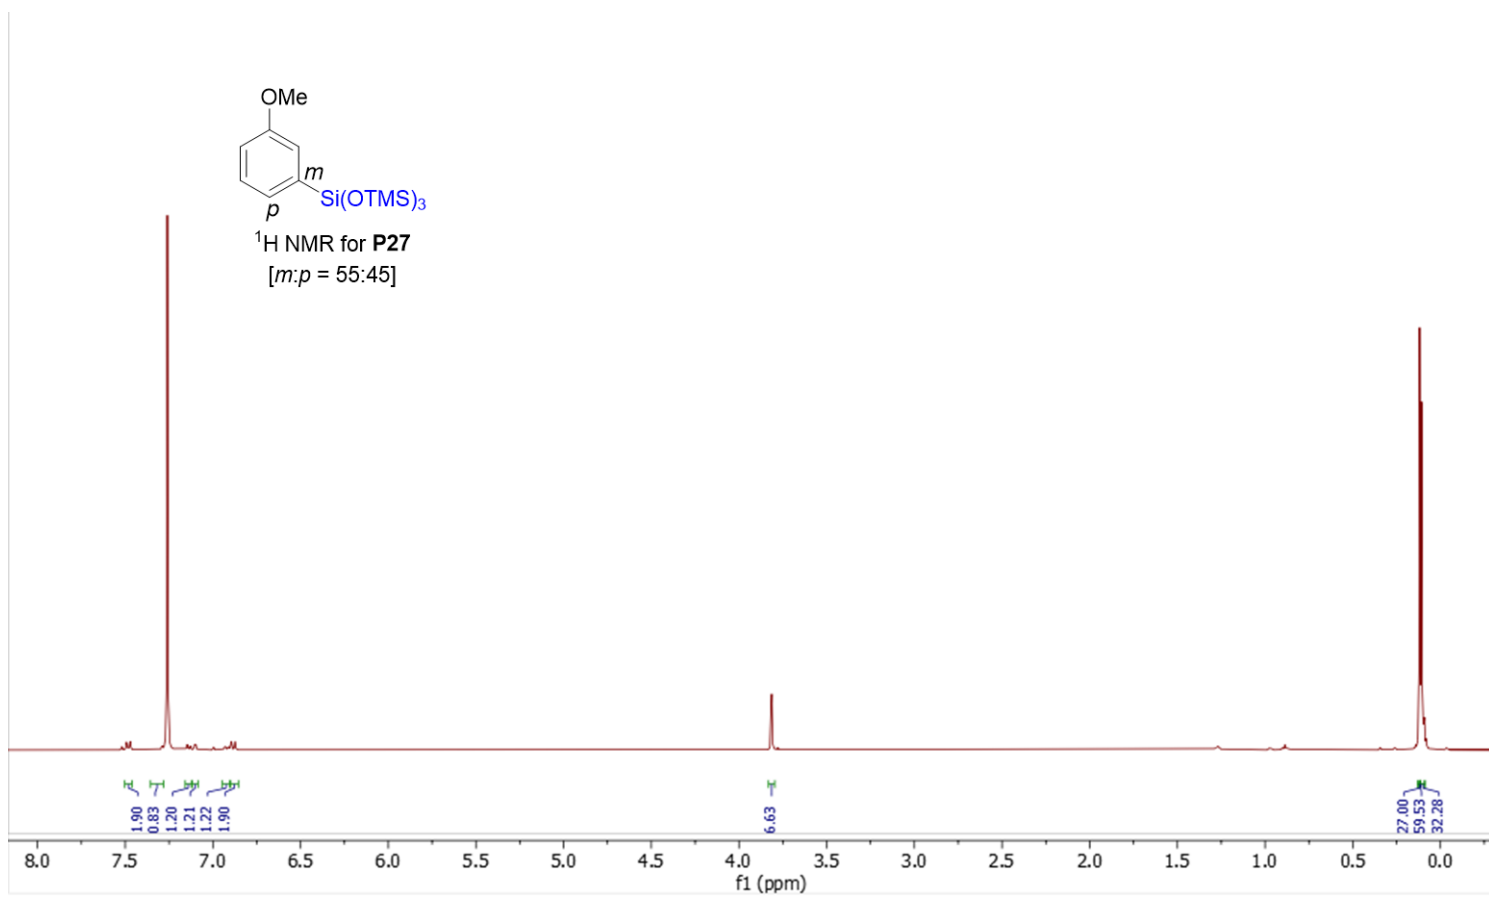



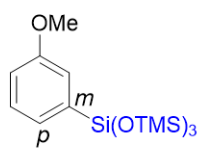

<sup>13</sup>C NMR for **P27**  
[*m*:*p* = 55:45]

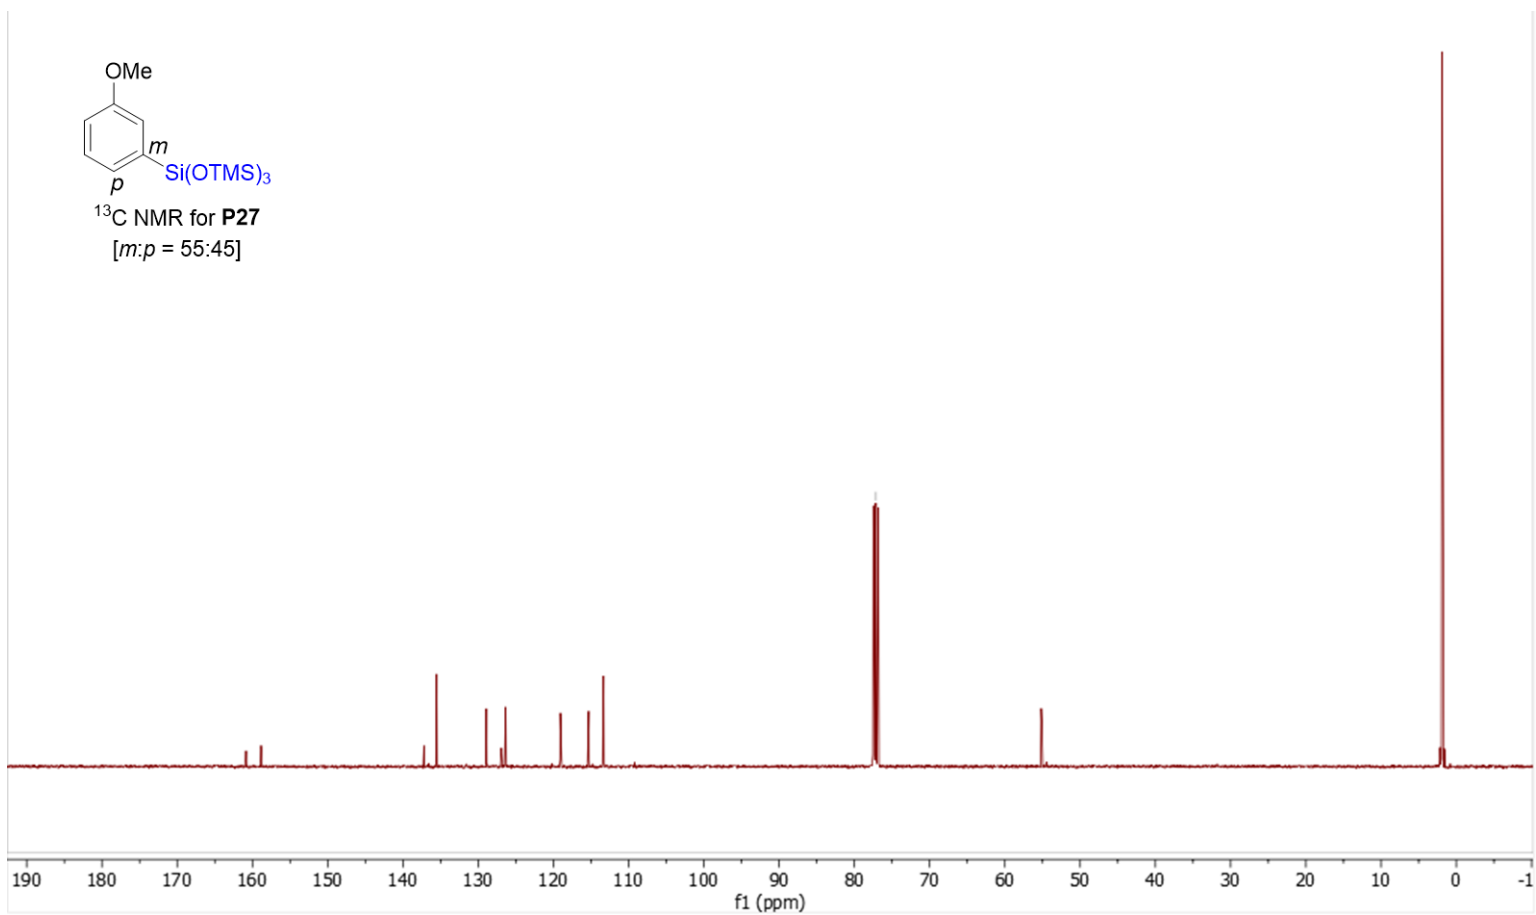

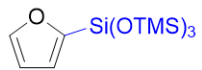

$^1\text{H}$  NMR for **P29**

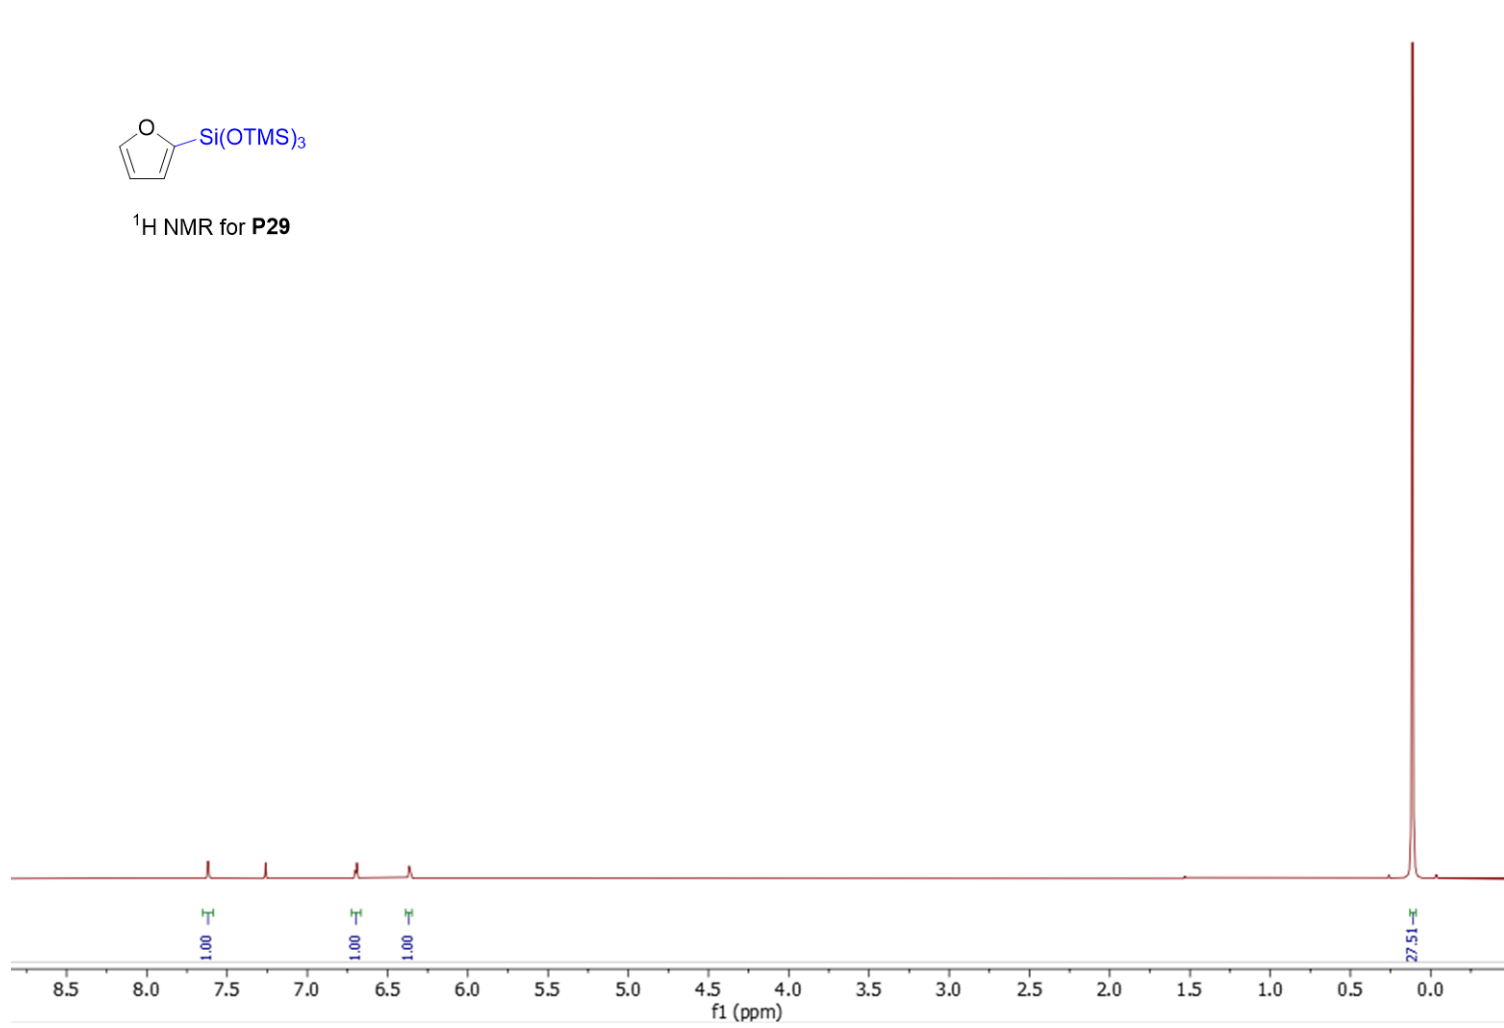

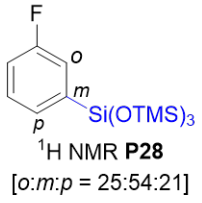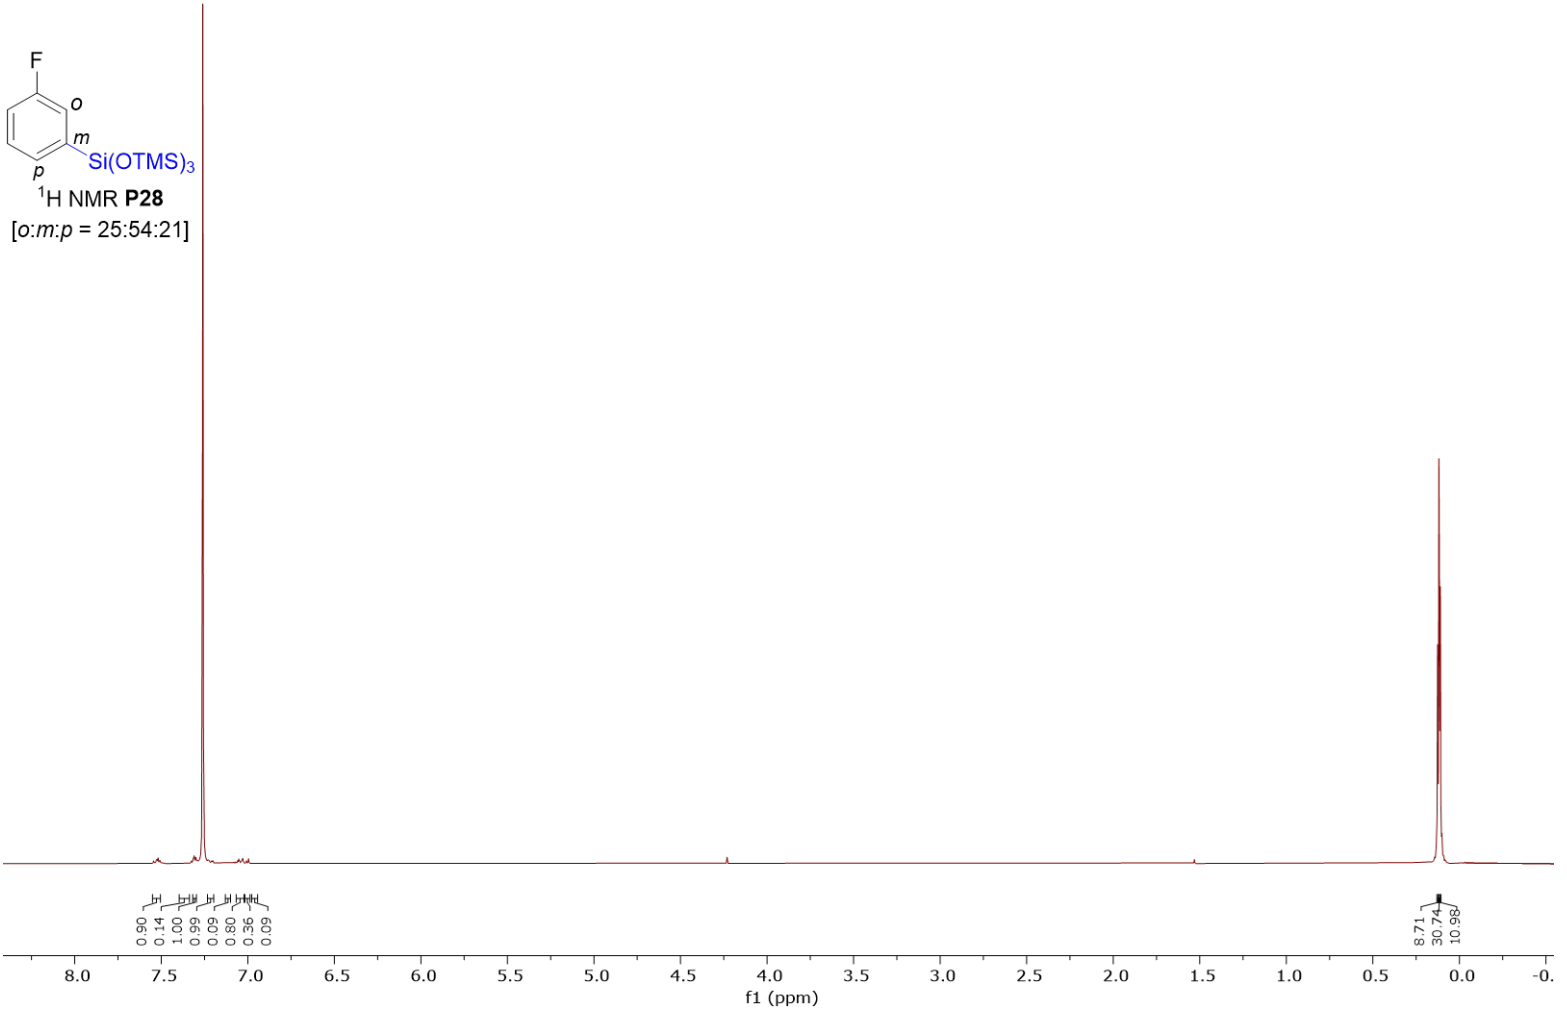

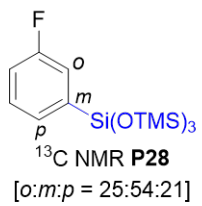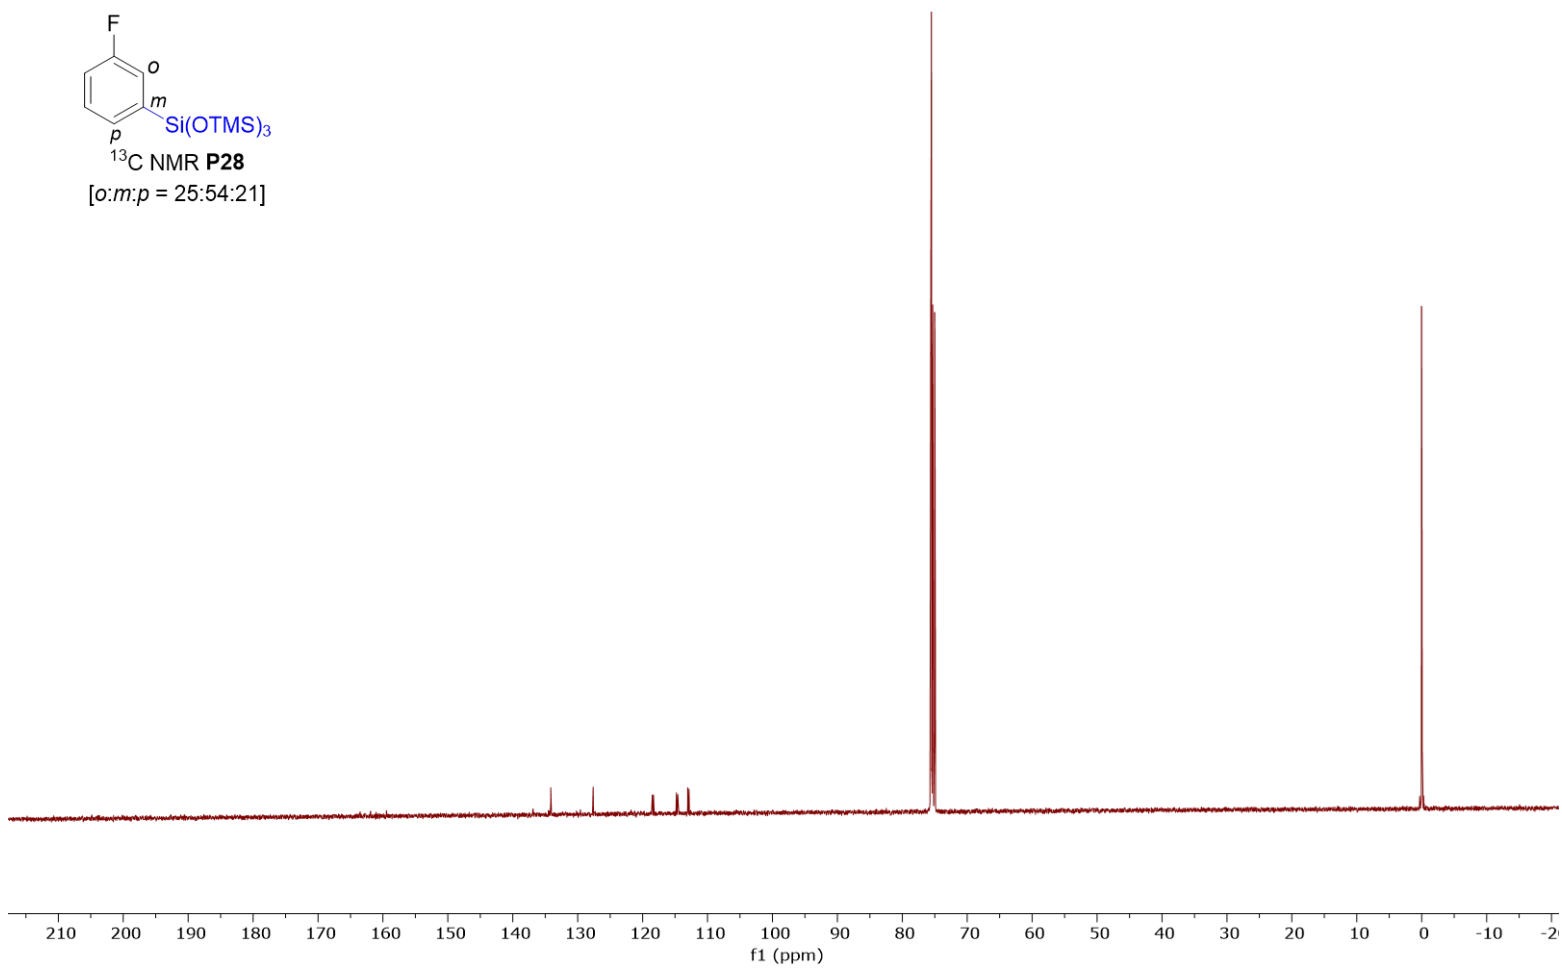

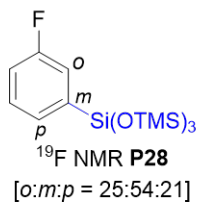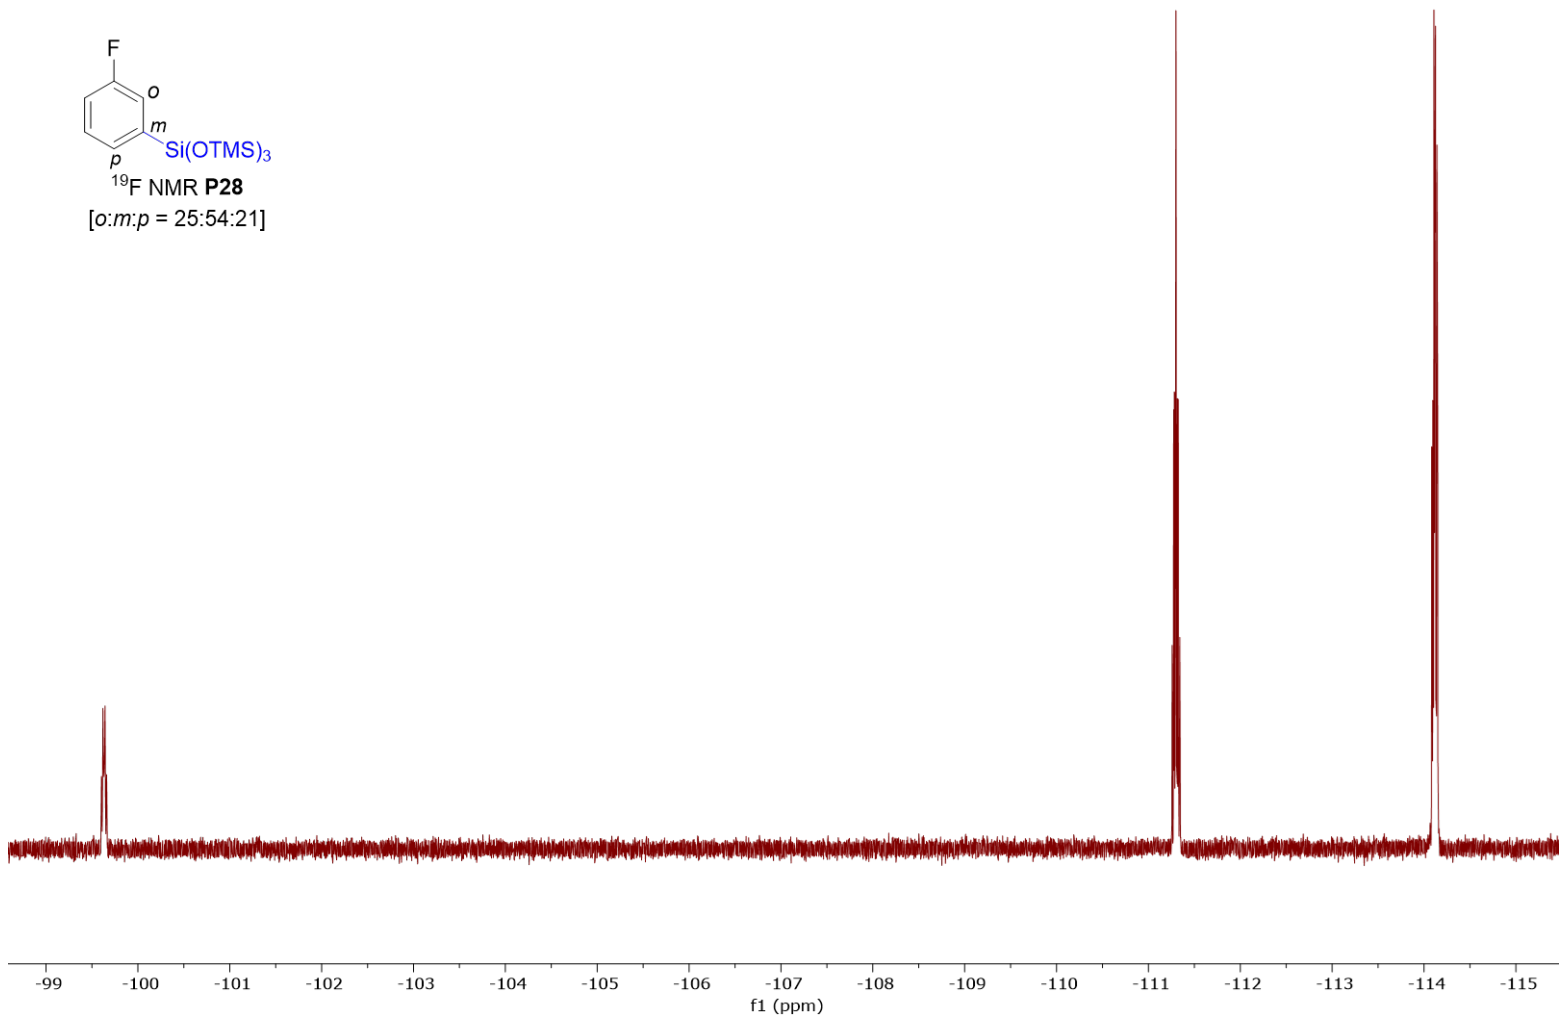

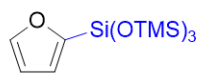

$^{13}\text{C}$  NMR of P29

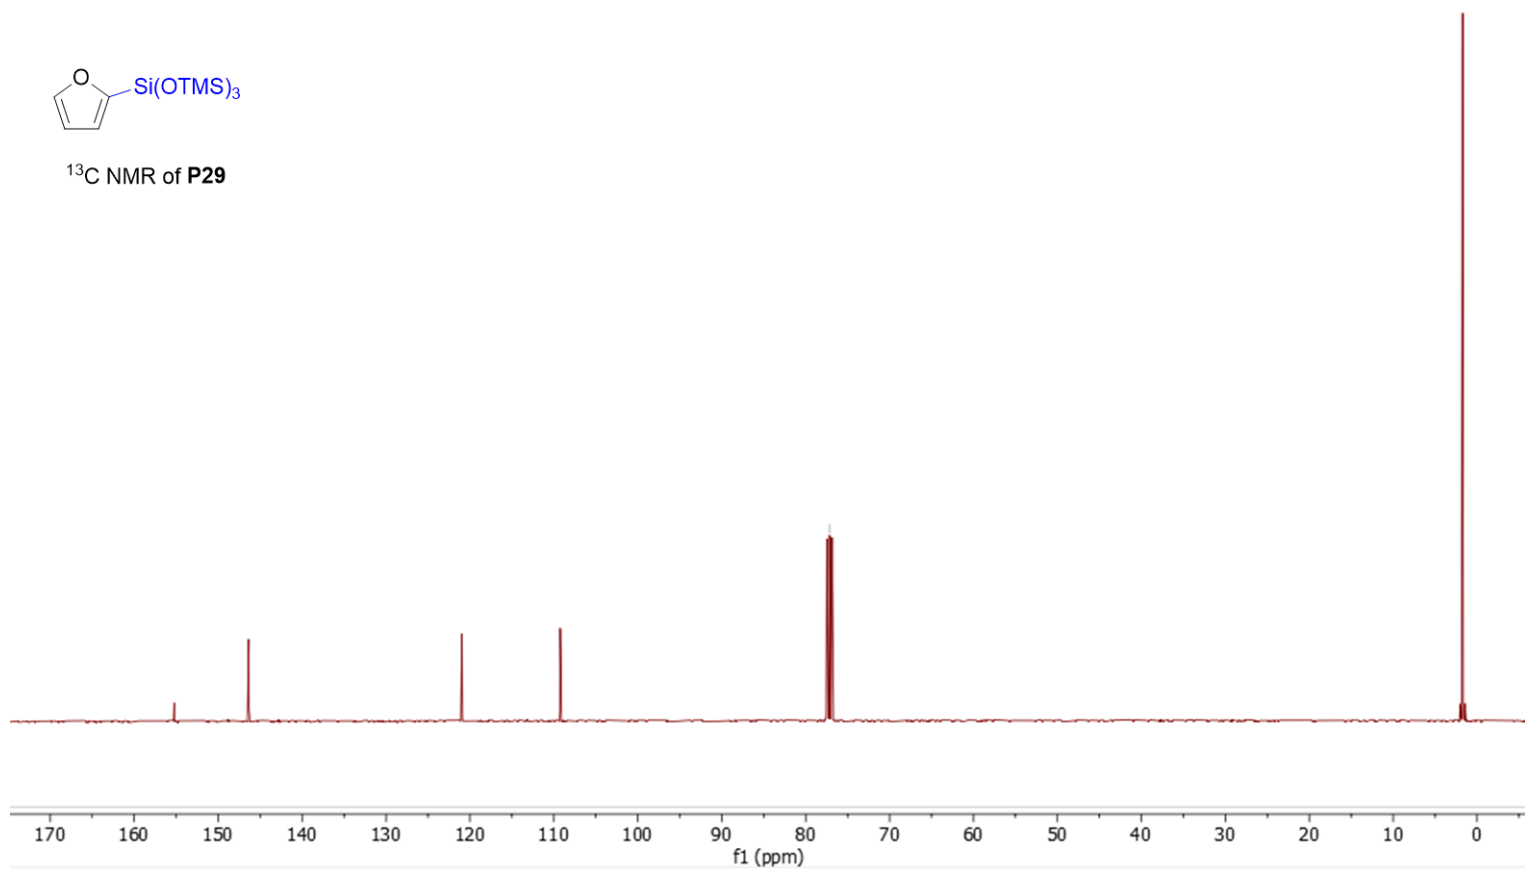

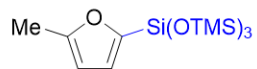

<sup>1</sup>H NMR of P30

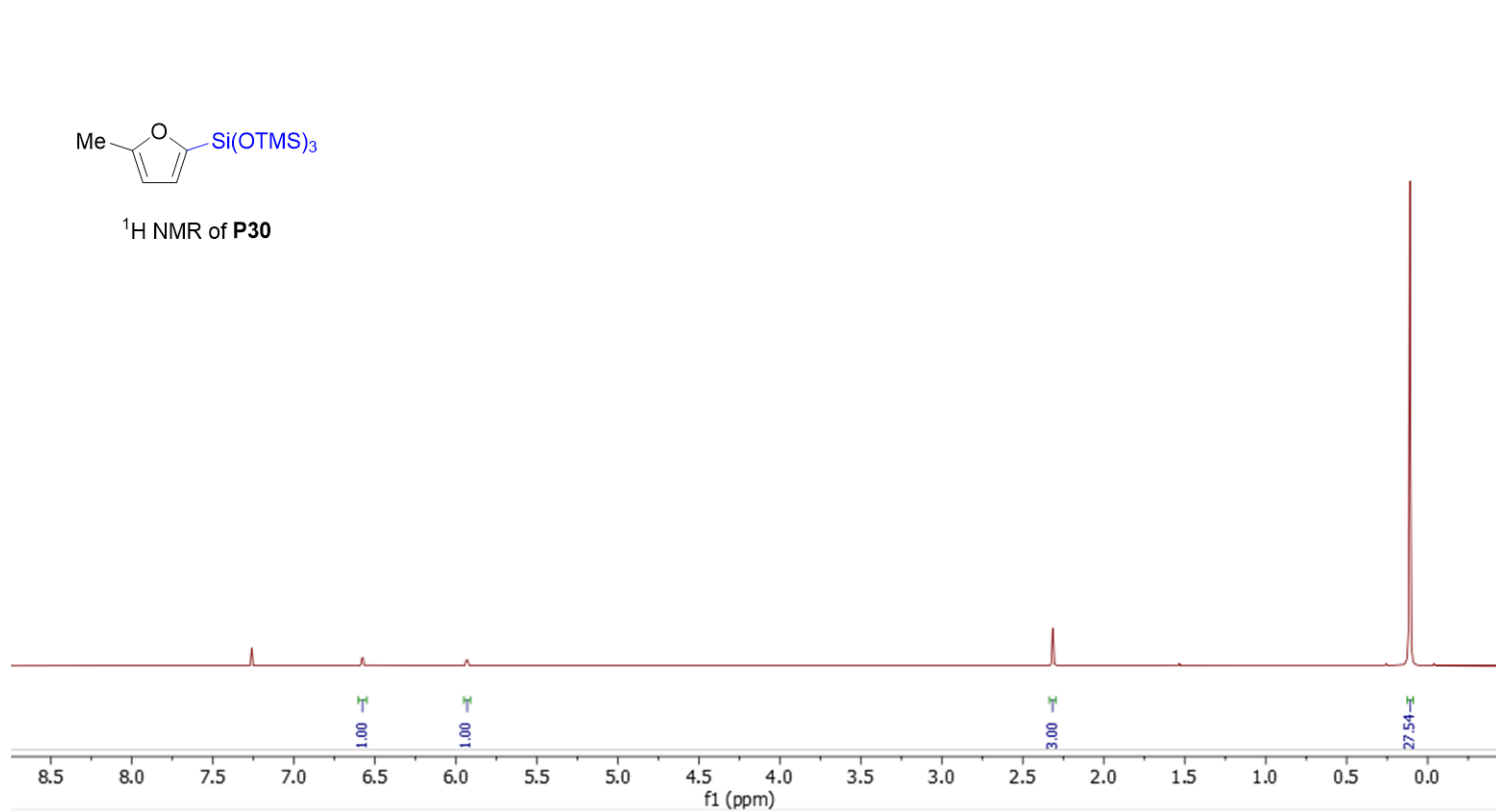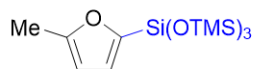

<sup>13</sup>C NMR of P30

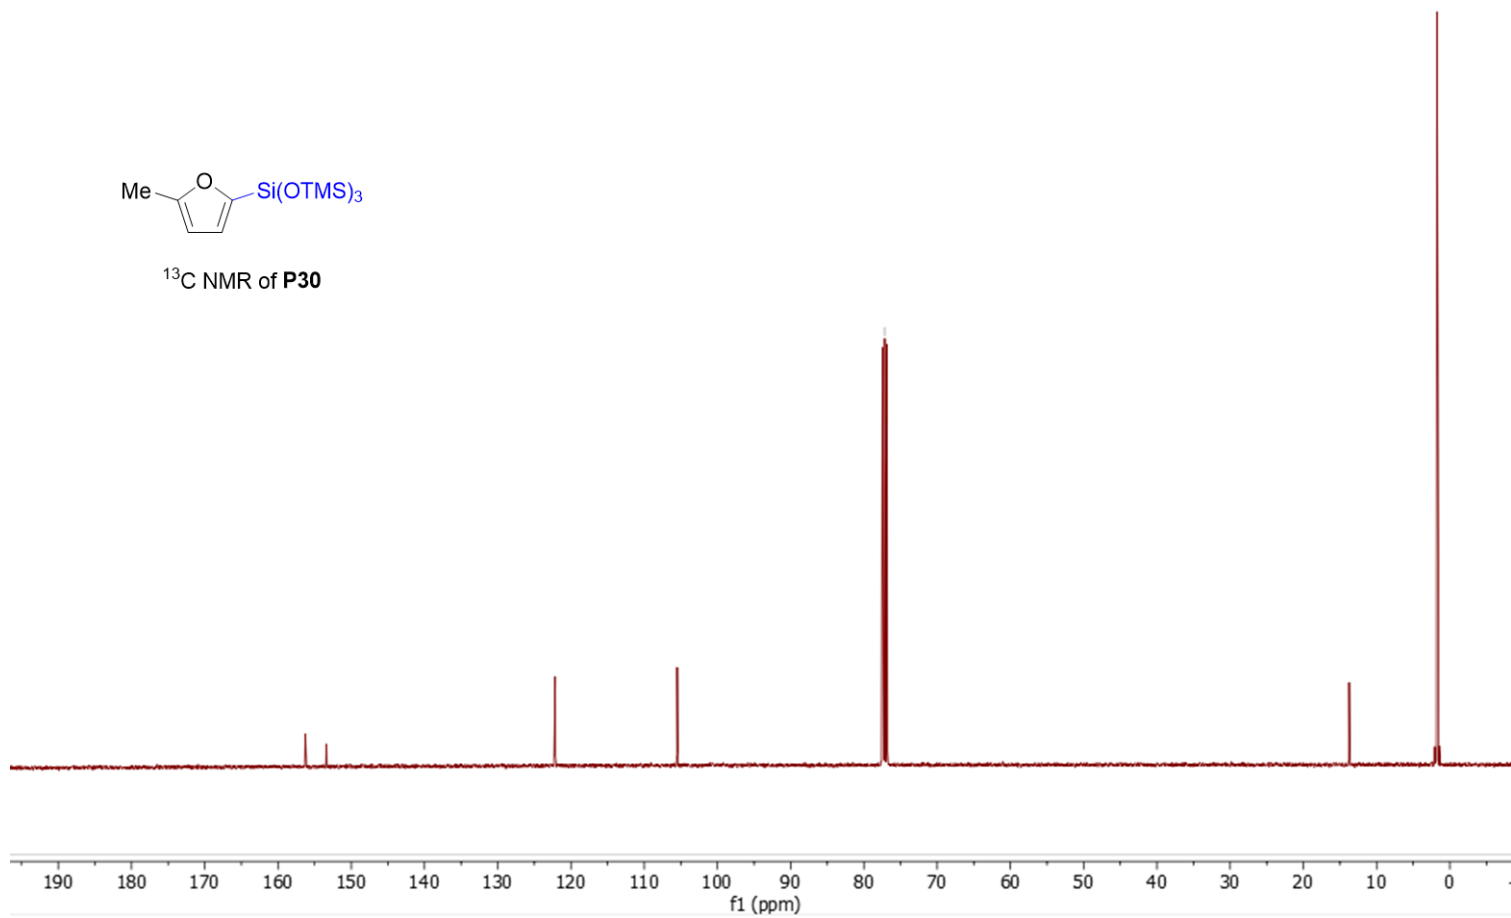

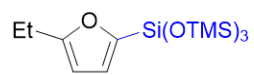

<sup>1</sup>H NMR of P31

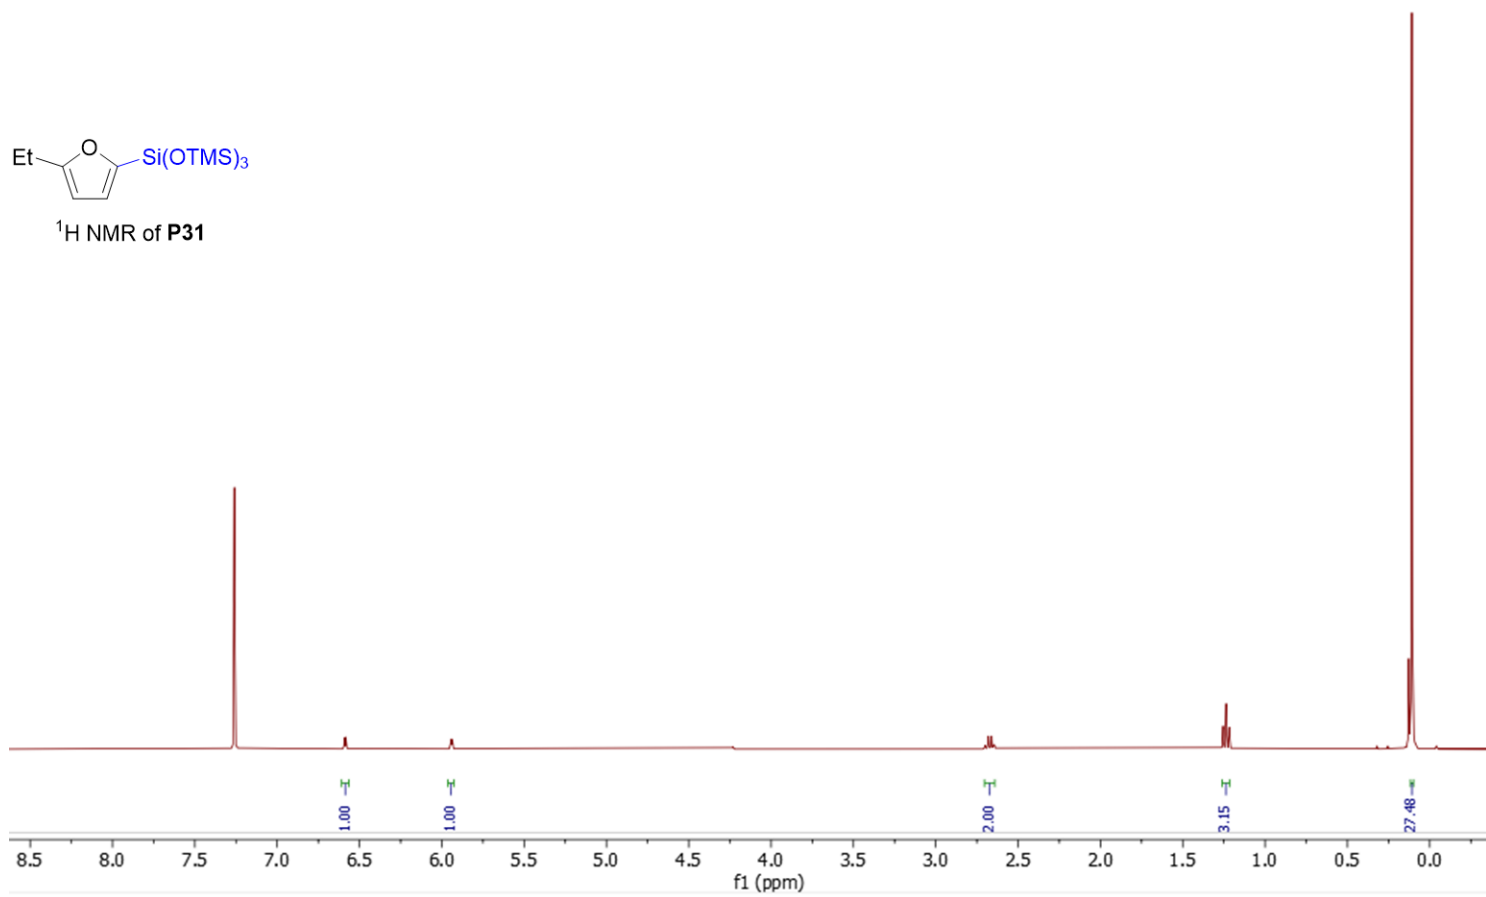



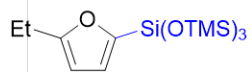

<sup>13</sup>C NMR of P31

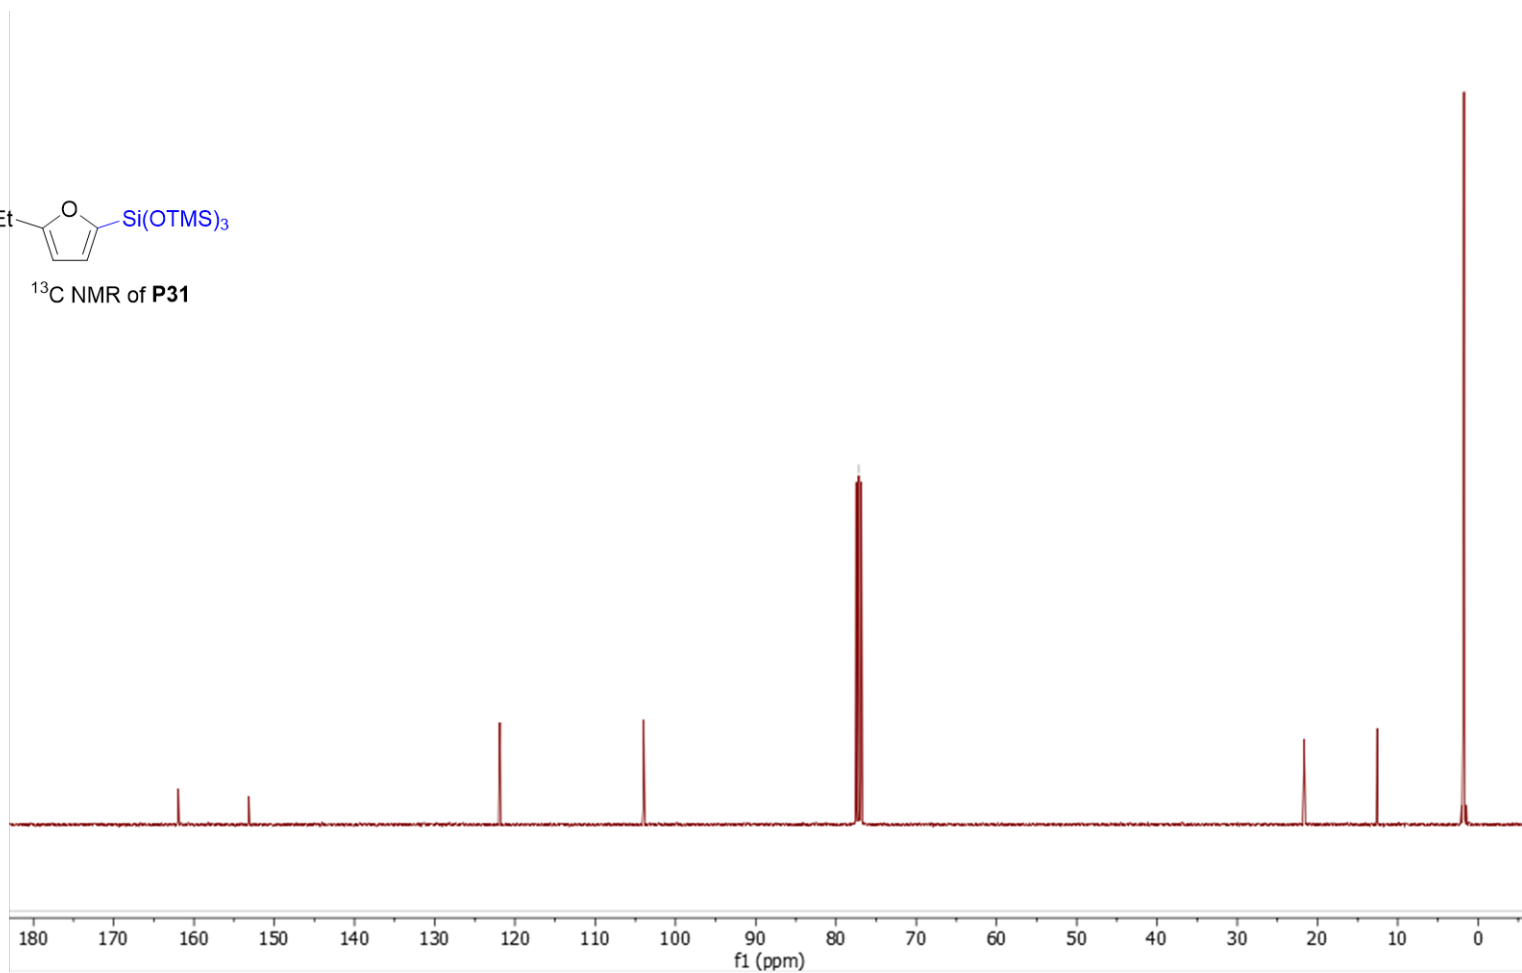

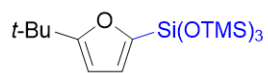

<sup>1</sup>H NMR of P32

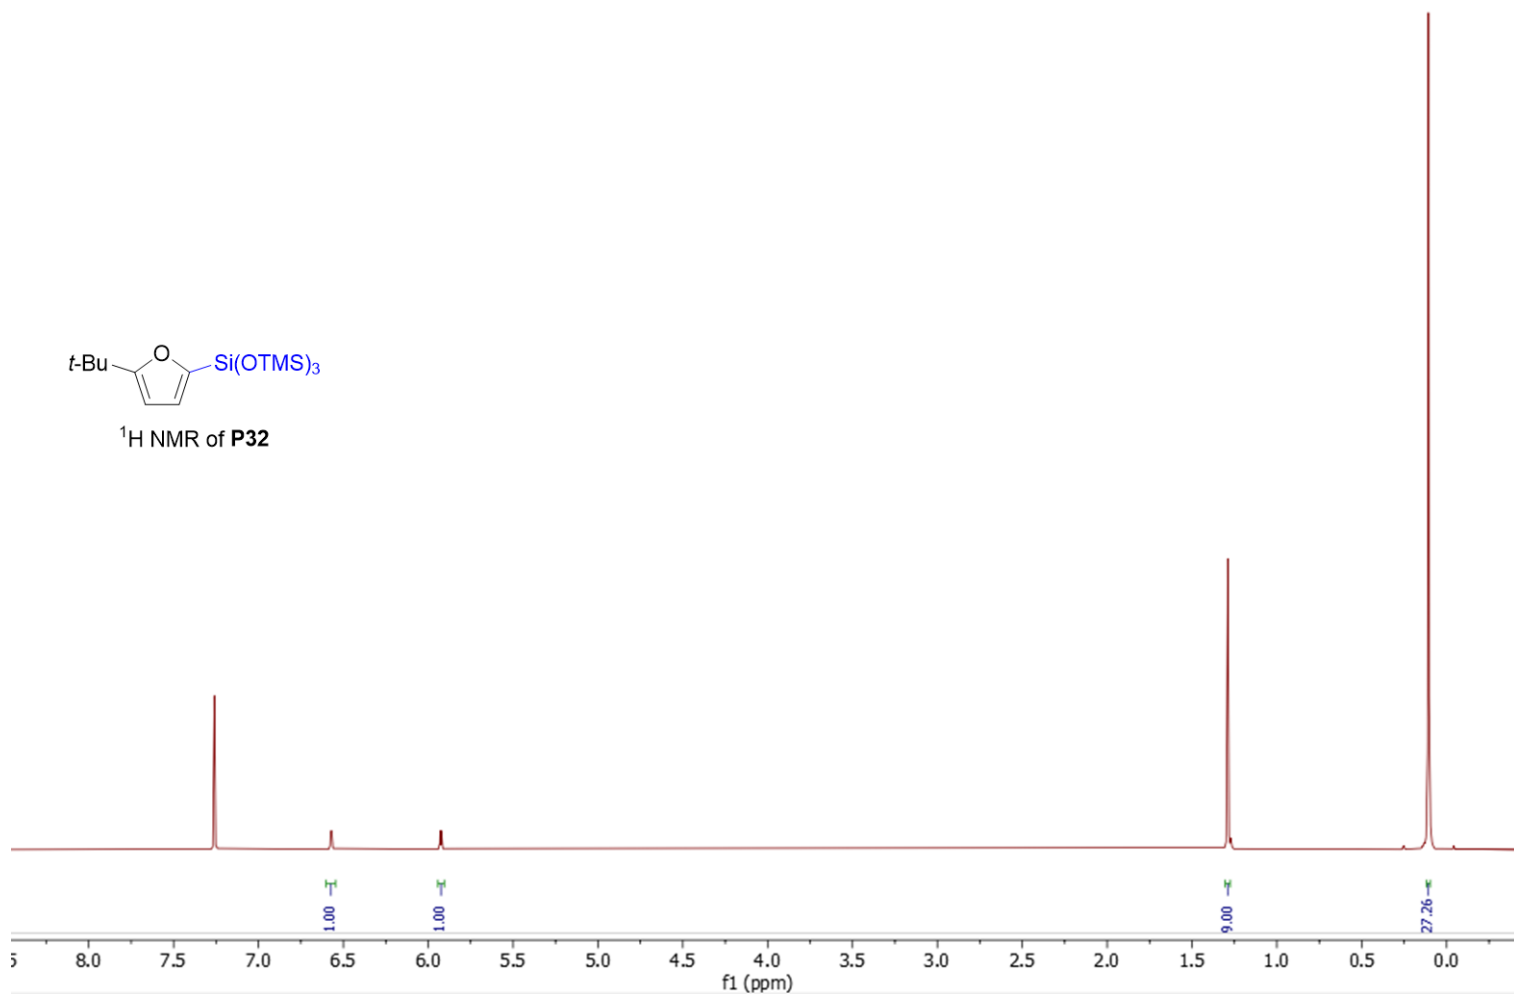

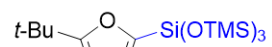

$^{13}\text{C}$  NMR of **P32**

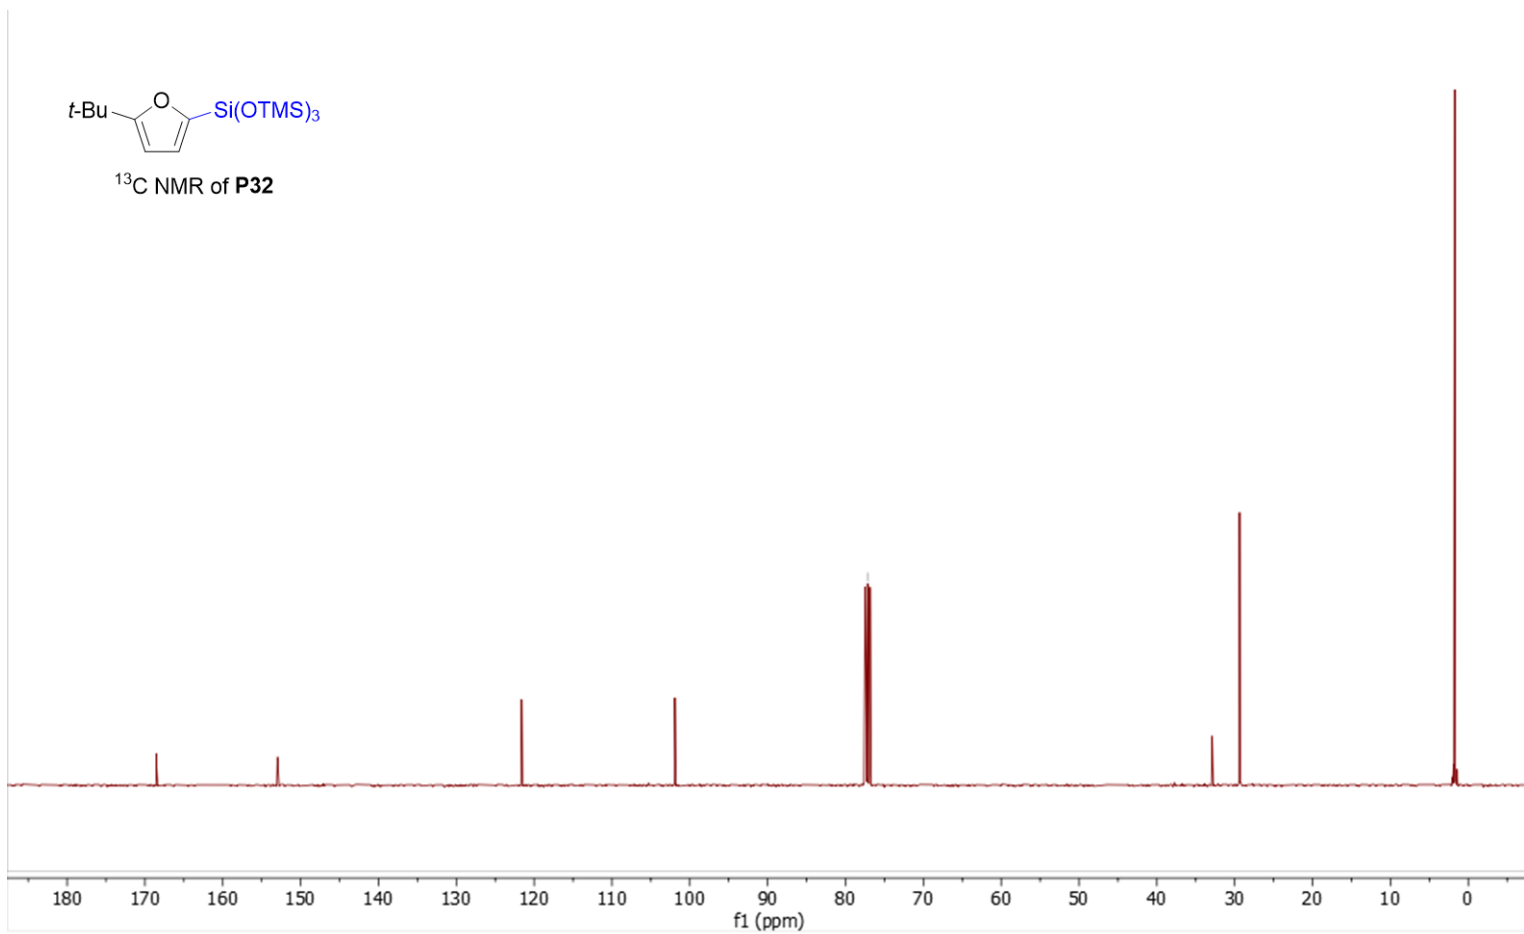

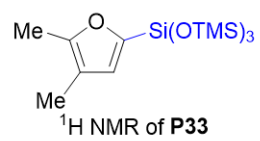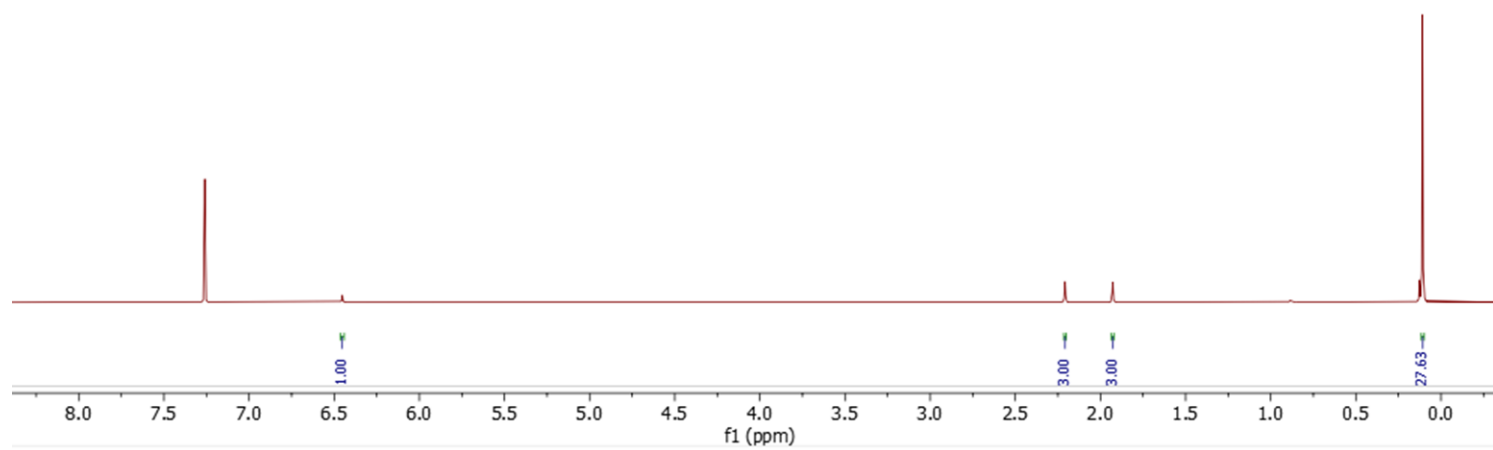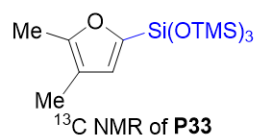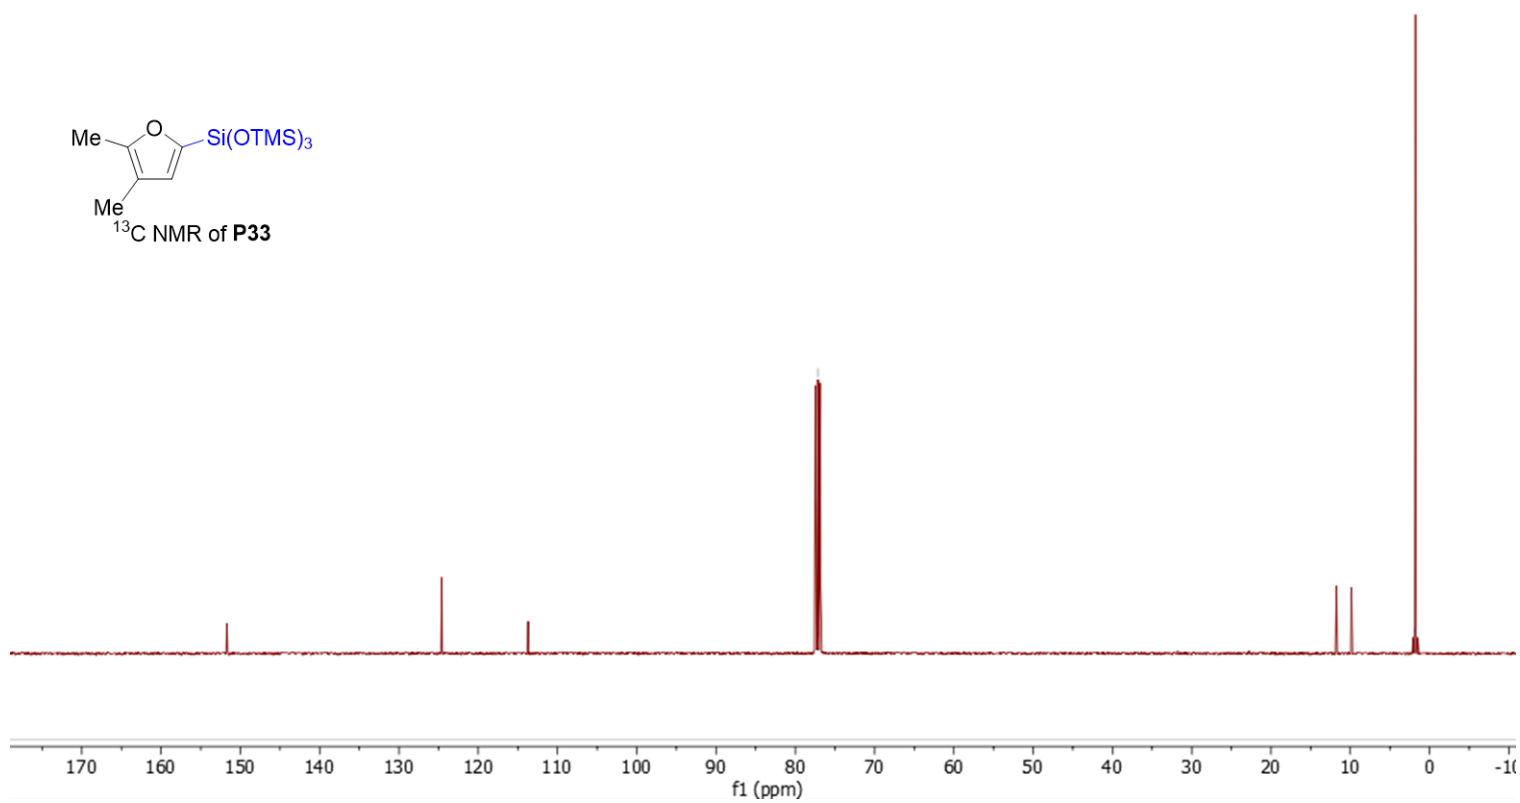

P34

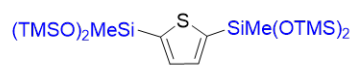

<sup>1</sup>H NMR of P38

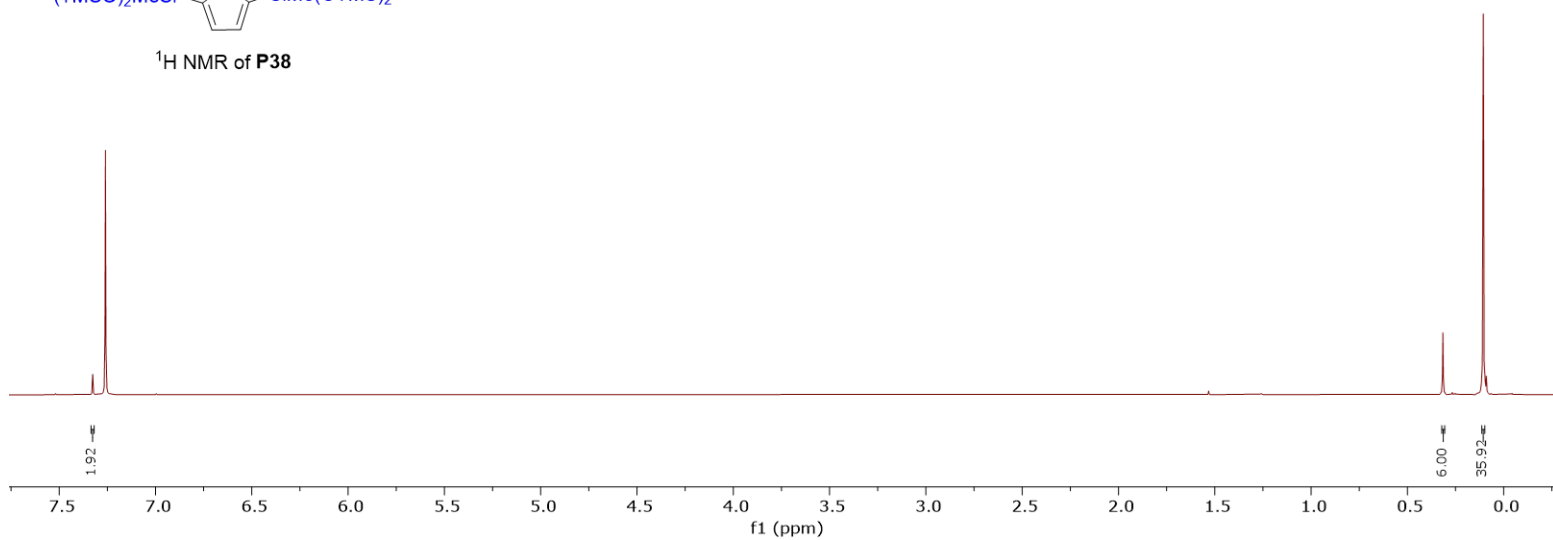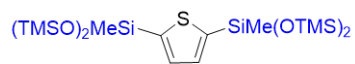

<sup>13</sup>C NMR of P38

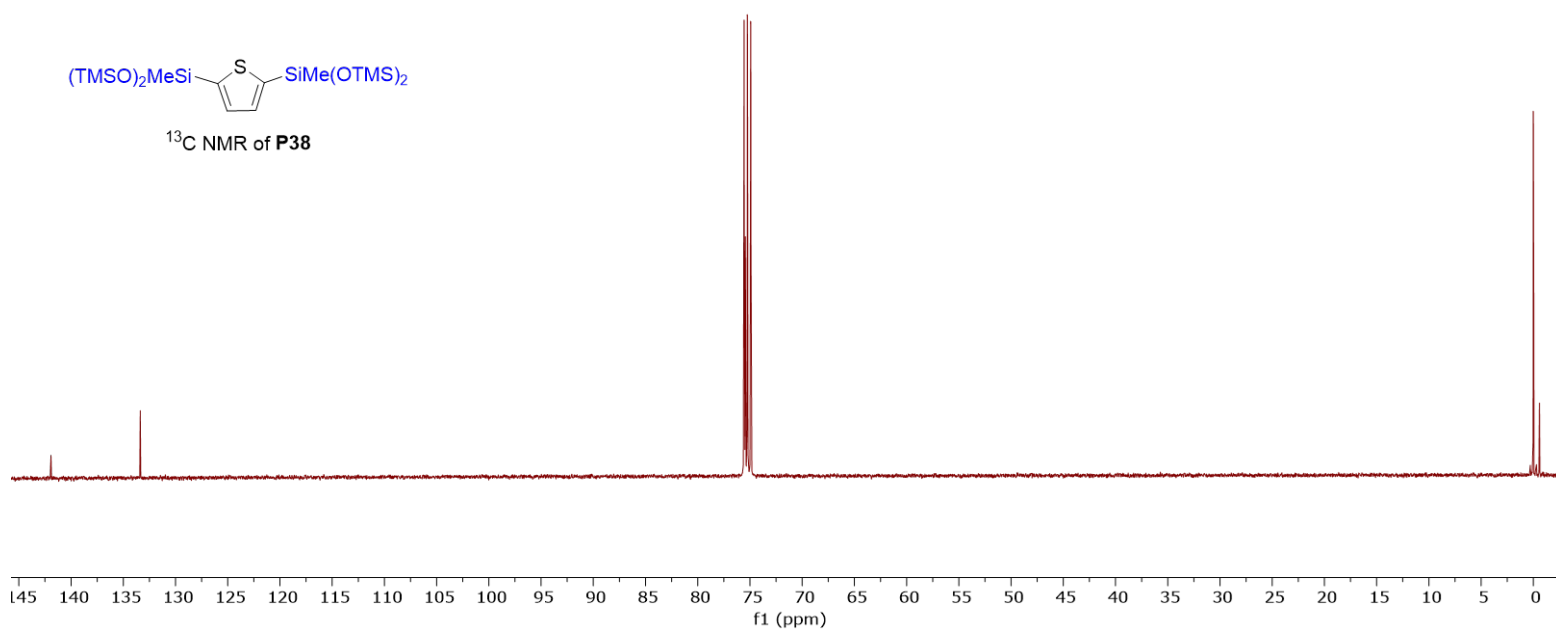

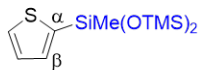

<sup>1</sup>H NMR of P39  
[ $\alpha$ : $\beta$  = 97:3]

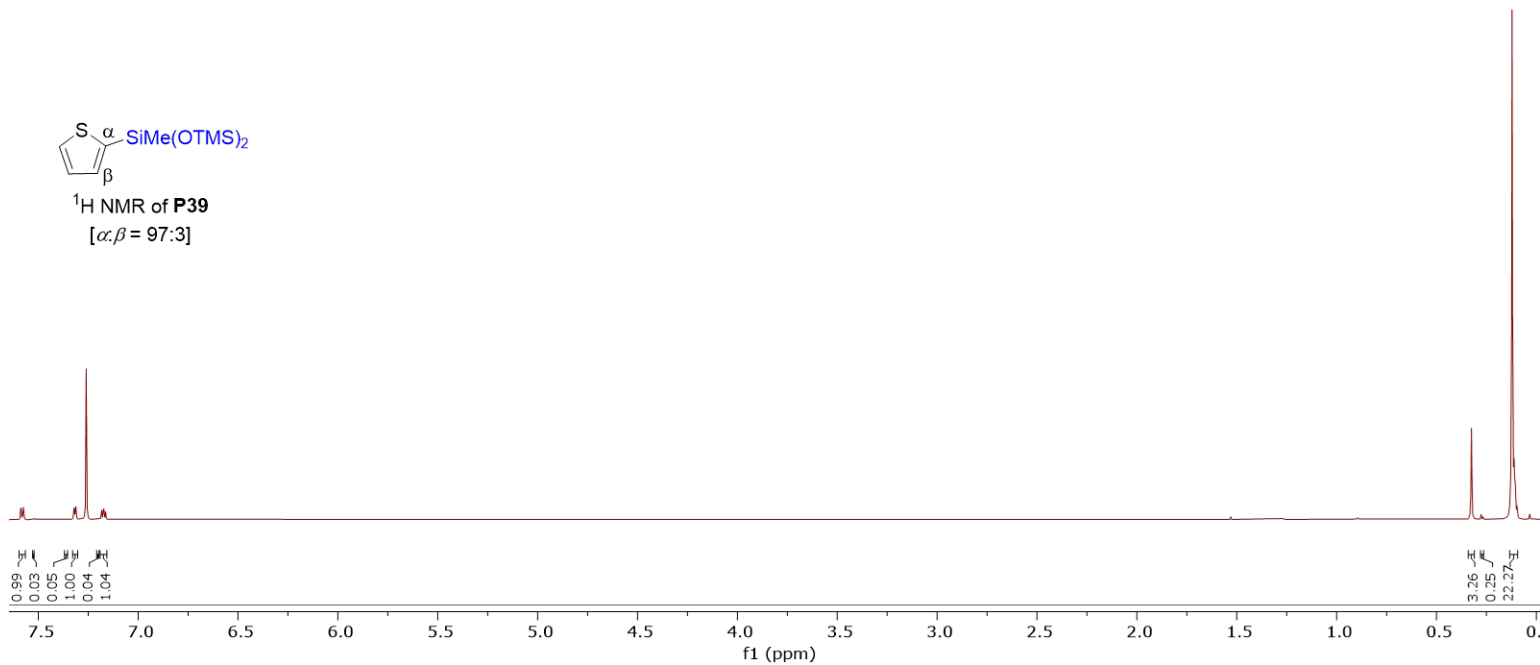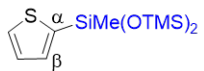

<sup>13</sup>C NMR of P39  
[ $\alpha$ : $\beta$  = 97:3]

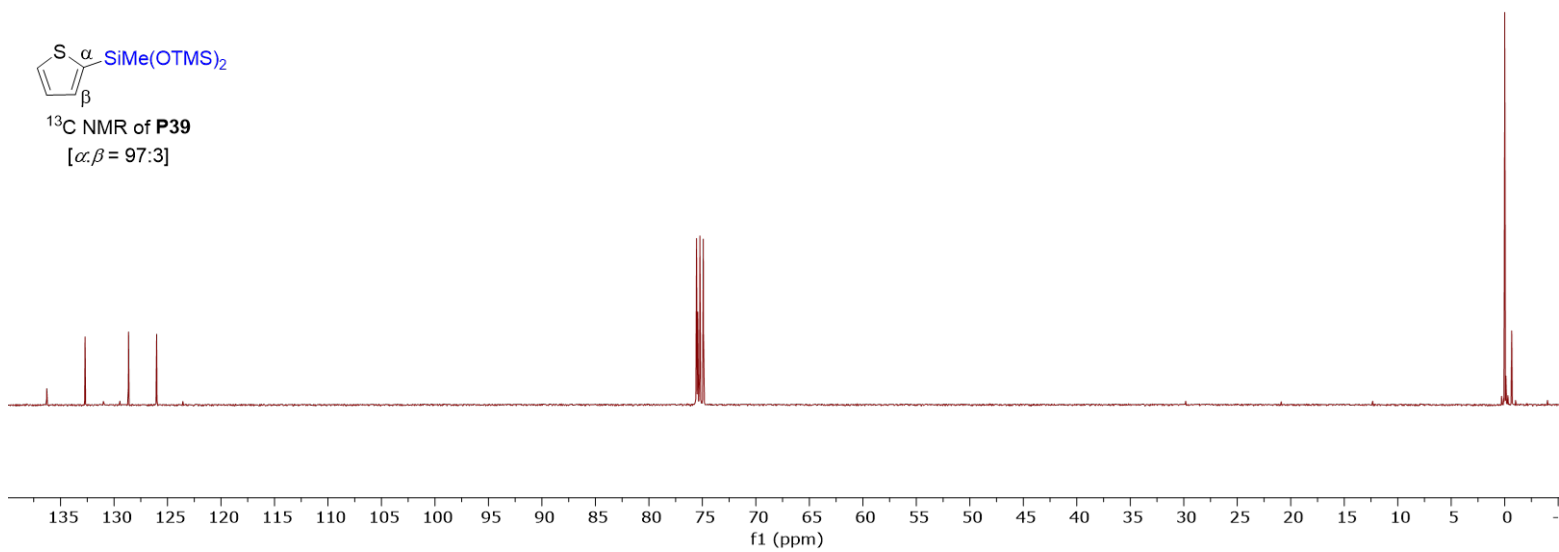

### 3.2 Rh complex

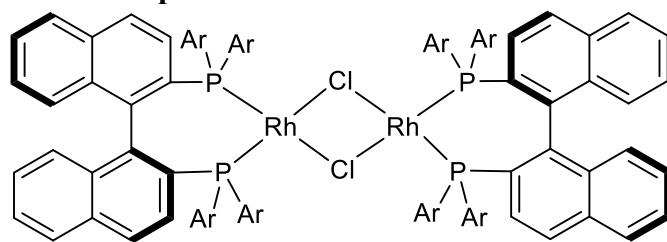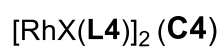

$^{31}\text{P}$  NMR of **C4**

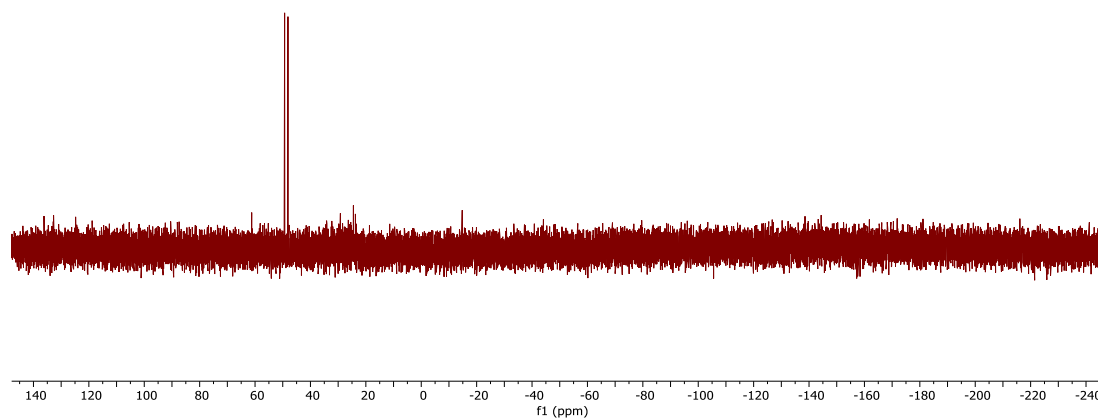

$^1\text{H}$  NMR of **C4**

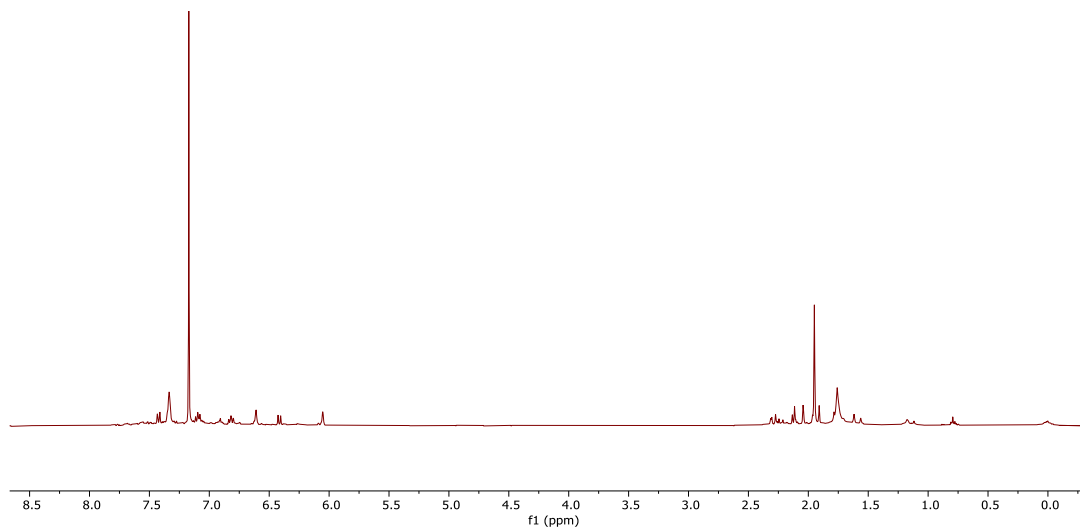

## 4. Crystallographic data

Table S21. Crystal data and structure refinement for **C4**.

|                                    |                                                                                 |
|------------------------------------|---------------------------------------------------------------------------------|
| Empirical formula                  | C <sub>104</sub> H <sub>96</sub> Cl <sub>2</sub> P <sub>4</sub> Rh <sub>2</sub> |
| Formula weight                     | 1746.40                                                                         |
| Temperature/K                      | 100.0                                                                           |
| Crystal system                     | orthorhombic                                                                    |
| Space group                        | P2 <sub>1</sub> 2 <sub>1</sub> 2 <sub>1</sub>                                   |
| a, b, c                            | 14.3389(8), 23.8027(13), 24.6313(13)                                            |
| α, β, γ                            | 90, 90, 90                                                                      |
| Volume/Å <sup>3</sup>              | 8406.8(8)                                                                       |
| Z                                  | 4                                                                               |
| ρ <sub>calc</sub> /cm <sup>3</sup> | 1.380                                                                           |
| μ/mm <sup>-1</sup>                 | 0.582                                                                           |
| F(000)                             | 3616.0                                                                          |
| Crystal size/mm <sup>3</sup>       | 0.179 × 0.089 × 0.062                                                           |
| Radiation                          | MoKα (λ = 0.71073)                                                              |
| 2θ range for data collection/°     | 4.36 to 55.03                                                                   |
| Index ranges                       | -18 ≤ h ≤ 18, -30 ≤ k ≤ 30, -32 ≤ l ≤ 32                                        |
| Reflections collected              | 148406                                                                          |
| Independent reflections            | 19287 [R <sub>int</sub> = 0.1133, R <sub>sigma</sub> = 0.0674]                  |
| Data/restraints/parameters         | 19287/0/1026                                                                    |
| Goodness-of-fit on F <sup>2</sup>  | 1.019                                                                           |



Final R indexes [ $I \geq 2\sigma(I)$ ]  $R_1 = 0.0434$ ,  $wR_2 = 0.0945$   
 Final R indexes [all data]  $R_1 = 0.0625$ ,  $wR_2 = 0.1035$   
 Largest diff. peak/hole /  $e \text{ \AA}^{-3}$  1.15/-0.45  
 Flack parameter -0.03(3)

Table S22. Fractional Atomic Coordinates ( $\times 10^4$ ) and Equivalent Isotropic Displacement Parameters ( $\text{\AA}^2 \times 10^3$ ) for C4.  $U_{eq}$  is defined as 1/3 of the trace of the orthogonalised  $U_{ij}$  tensor

| Atom | $x$        | $y$       | $z$       | $U(eq)$   |
|------|------------|-----------|-----------|-----------|
| Rh01 | 6023.1(3)  | 6588.8(2) | 7103.0(2) | 25.55(10) |
| Rh02 | 4512.3(3)  | 5982.2(2) | 6094.8(2) | 26.12(10) |
| P03  | 5853.7(10) | 7007.4(6) | 7883.7(6) | 24.5(3)   |
| Cl04 | 6075.6(10) | 6372.2(6) | 6143.1(6) | 29.7(3)   |
| Cl05 | 4356.4(10) | 6516.5(6) | 6928.0(6) | 34.7(3)   |
| P06  | 3013.8(10) | 5757.2(6) | 6141.3(6) | 26.2(3)   |
| P07  | 4572.9(11) | 5638.8(6) | 5269.8(6) | 25.4(3)   |
| P08  | 7500.4(11) | 6408.4(6) | 7266.5(6) | 28.3(3)   |
| C009 | 2254(4)    | 4685(2)   | 5905(2)   | 27.2(12)  |
| C00A | 5542(4)    | 5971(3)   | 9444(2)   | 36.1(13)  |
| C00B | 2504(4)    | 5212(2)   | 5687(2)   | 25.5(12)  |
| C00C | 5624(4)    | 6032(2)   | 8478(2)   | 29.6(12)  |
| C00D | 1980(4)    | 4427(3)   | 3888(3)   | 33.9(13)  |
| C00E | 1789(4)    | 5487(3)   | 7024(3)   | 34.2(14)  |
| C00F | 5696(4)    | 6614(2)   | 8510(2)   | 27.3(12)  |
| C00G | 4835(4)    | 7470(2)   | 7849(2)   | 26.6(12)  |
| C00H | 1998(4)    | 4244(2)   | 5588(2)   | 29.5(13)  |
| C00I | 8119(4)    | 5570(3)   | 8682(3)   | 39.8(16)  |
| C00J | 4138(4)    | 7479(2)   | 8240(2)   | 31.4(13)  |
| C00K | 5597(5)    | 6555(3)   | 9493(2)   | 37.6(14)  |
| C00L | 2679(4)    | 5474(2)   | 6804(2)   | 29.7(13)  |
| C00M | 8083(4)    | 5989(3)   | 9086(3)   | 37.7(15)  |
| C00N | 1783(4)    | 3905(3)   | 4123(3)   | 37.2(15)  |
| C00O | 1087(4)    | 6050(2)   | 4614(2)   | 30.1(12)  |
| C00P | 729(4)     | 6764(3)   | 5801(2)   | 36.5(15)  |
| C00Q | 2463(4)    | 5292(2)   | 5134(2)   | 24.1(12)  |
| C00R | 8459(4)    | 7661(3)   | 8279(2)   | 29.9(13)  |
| C00S | 2292(4)    | 6758(2)   | 4487(2)   | 30.5(13)  |
| C00T | 6409(4)    | 5870(2)   | 3992(2)   | 32.2(13)  |
| C00U | 2665(4)    | 6875(3)   | 5915(2)   | 33.9(14)  |
| C00V | 5604(4)    | 5864(2)   | 4301(2)   | 28.5(12)  |
| C00W | 8016(4)    | 4718(3)   | 6406(3)   | 35.4(14)  |
| C00X | 1280(4)    | 6307(3)   | 5943(2)   | 31.9(13)  |
| C00Y | 449(5)     | 6406(3)   | 4393(2)   | 34.9(13)  |
| C00Z | 4747(4)    | 7817(2)   | 7393(2)   | 31.0(13)  |
| C010 | 6824(4)    | 7494(2)   | 8046(2)   | 24.7(12)  |

| <b>Atom</b> | <b>x</b> | <b>y</b> | <b>z</b> | <b>U(eq)</b> |
|-------------|----------|----------|----------|--------------|
| C011        | 2132(5)  | 7336(3)  | 5748(3)  | 36.1(15)     |
| C012        | 8206(4)  | 5521(3)  | 5093(3)  | 40.8(16)     |
| C013        | 5554(4)  | 5711(2)  | 8944(3)  | 33.2(13)     |
| C014        | 3355(4)  | 7823(3)  | 8177(3)  | 37.3(15)     |
| C015        | 8422(4)  | 6914(2)  | 7101(3)  | 30.0(12)     |
| C016        | 2193(4)  | 4882(2)  | 4208(2)  | 29.3(13)     |
| C017        | 3376(4)  | 5153(2)  | 7070(3)  | 33.0(13)     |
| C018        | 4341(5)  | 3892(3)  | 3914(3)  | 47.8(17)     |
| C019        | 6477(4)  | 5636(2)  | 5103(3)  | 30.6(13)     |
| C01A        | 2246(4)  | 6357(2)  | 6012(2)  | 27.5(12)     |
| C01B        | 2040(4)  | 6208(2)  | 4660(2)  | 27.4(12)     |
| C01C        | 2200(4)  | 4832(2)  | 4787(2)  | 26.8(12)     |
| C01D        | 9349(4)  | 6808(3)  | 7233(2)  | 34.0(14)     |
| C01E        | 7789(4)  | 5743(2)  | 6924(2)  | 30.3(13)     |
| C01F        | 698(4)   | 6949(3)  | 4219(3)  | 37.0(15)     |
| C01G        | 2738(4)  | 5846(2)  | 4887(2)  | 25.1(12)     |
| C01H        | 3304(5)  | 8167(3)  | 7726(3)  | 41.7(16)     |
| C01I        | 3998(5)  | 8176(3)  | 7331(2)  | 37.2(14)     |
| C01J        | 3652(4)  | 6020(2)  | 4906(2)  | 26.6(12)     |
| C01K        | 7974(4)  | 5699(3)  | 8152(3)  | 37.9(15)     |
| C01L        | 9342(4)  | 7472(3)  | 8451(3)  | 37.0(14)     |
| C01M        | 3888(4)  | 6584(2)  | 4744(2)  | 29.1(12)     |
| C01N        | 6736(4)  | 8074(2)  | 7937(2)  | 30.1(12)     |
| C01O        | -300(4)  | 6710(3)  | 5729(3)  | 38.8(15)     |
| C01P        | 7933(4)  | 6554(3)  | 8933(3)  | 34.5(13)     |
| C01Q        | 7802(4)  | 6683(3)  | 8370(2)  | 29.6(13)     |
| C01R        | 8636(4)  | 5602(3)  | 6685(3)  | 33.0(14)     |
| C01S        | 1561(5)  | 5179(3)  | 7480(3)  | 37.5(15)     |
| C01T        | 4373(4)  | 4106(3)  | 4473(3)  | 36.8(14)     |
| C01U        | 7666(4)  | 7290(2)  | 8222(2)  | 28.3(12)     |
| C01V        | 10067(5) | 7828(3)  | 8508(3)  | 44.8(17)     |
| C01W        | 8168(4)  | 7437(3)  | 6906(2)  | 33.3(14)     |
| C01X        | 7264(4)  | 5765(2)  | 4255(3)  | 32.9(14)     |
| C01Y        | 5516(5)  | 5069(2)  | 8906(3)  | 43.1(15)     |
| C01Z        | 1176(5)  | 7276(3)  | 5701(3)  | 40.8(16)     |
| C020        | 1991(4)  | 4300(2)  | 5020(2)  | 29.3(13)     |
| C021        | 9676(4)  | 4943(3)  | 6151(3)  | 39.3(15)     |
| C022        | 5687(4)  | 6870(3)  | 9022(2)  | 33.9(14)     |
| C023        | 1788(4)  | 3840(2)  | 4676(3)  | 36.4(15)     |
| C024        | 4410(4)  | 4682(2)  | 4585(2)  | 30.6(13)     |
| C025        | 7809(4)  | 6261(2)  | 7982(2)  | 30.3(13)     |
| C026        | 2606(6)  | 7878(3)  | 5597(3)  | 50.8(19)     |
| C027        | 7304(4)  | 5646(2)  | 4805(3)  | 30.9(13)     |
| C028        | 5619(4)  | 5750(2)  | 4852(2)  | 27.9(12)     |

| Atom | x        | y       | z        | U(eq)    |
|------|----------|---------|----------|----------|
| C029 | 10035(5) | 7216(3) | 7154(3)  | 42.4(16) |
| C02A | 3230(4)  | 6932(2) | 4545(3)  | 32.5(13) |
| C02B | 7062(4)  | 5354(2) | 6899(3)  | 34.0(14) |
| C02C | 2255(5)  | 4863(3) | 7729(2)  | 37.1(15) |
| C02D | 8187(5)  | 6275(4) | 10029(3) | 52(2)    |
| C02E | 3944(5)  | 8568(3) | 6849(3)  | 52.1(19) |
| C02F | 8349(4)  | 8238(2) | 8160(2)  | 31.6(13) |
| C02G | 4387(4)  | 3745(2) | 4917(3)  | 38.6(15) |
| C02H | 3161(5)  | 4846(3) | 7532(3)  | 38.3(15) |
| C02I | 8053(5)  | 6835(3) | 9874(3)  | 46.4(17) |
| C02J | 8765(4)  | 5087(2) | 6422(2)  | 32.5(14) |
| C02K | 8221(5)  | 5868(3) | 9650(3)  | 46.4(18) |
| C02L | 562(5)   | 5169(3) | 7692(3)  | 50.8(18) |
| C02M | 1595(4)  | 7120(3) | 4275(3)  | 35.5(14) |
| C02N | 11049(5) | 7101(3) | 7288(3)  | 53.5(19) |
| C02O | 7172(4)  | 4837(3) | 6639(3)  | 35.9(14) |
| C02P | 7478(4)  | 8435(3) | 7995(2)  | 32.6(13) |
| C02Q | 4452(4)  | 4506(2) | 5543(2)  | 30.9(12) |
| C02R | 9134(5)  | 8603(3) | 8216(3)  | 38.7(15) |
| C02S | 6391(5)  | 5990(3) | 3396(3)  | 43.5(16) |
| C02T | 7914(4)  | 6973(3) | 9348(3)  | 38.4(15) |
| C02U | 8829(5)  | 7866(3) | 6854(3)  | 40.0(15) |
| C02V | 4433(5)  | 3928(2) | 5447(3)  | 39.0(15) |
| C02W | 3900(5)  | 4498(3) | 7811(3)  | 52.7(19) |
| C02X | 5567(6)  | 6835(3) | 10040(3) | 50.9(18) |
| C02Y | 9971(5)  | 8398(3) | 8382(3)  | 46.1(17) |
| C02Z | 6332(5)  | 4456(3) | 6589(3)  | 49.0(18) |
| C030 | 4438(4)  | 4886(2) | 5115(2)  | 28.7(12) |
| C031 | 8550(6)  | 8454(3) | 6728(3)  | 54(2)    |
| C032 | 9743(5)  | 7742(3) | 6970(3)  | 43.3(17) |
| C033 | 4459(6)  | 3520(3) | 5915(3)  | 54.0(19) |
| C034 | 2613(5)  | 7831(4) | 8603(3)  | 65(2)    |

Table S23. Distances (Å) and angles (°) of C4

| Distances (Å) |            | Angles (°)     |           |
|---------------|------------|----------------|-----------|
| Rh01-P03      | 2.1794(15) | C00X-C01A      | 1.401(8)  |
| Rh01-Cl04     | 2.4210(14) | P03-Rh01-Cl04  | 164.26(5) |
| Rh01-Cl05     | 2.4345(15) | C00Y-C01F      | 1.408(9)  |
| Rh01-P08      | 2.1986(16) | P03-Rh01-Cl05  | 94.54(5)  |
| Rh02-Cl04     | 2.4292(14) | C00Z-C01I      | 1.382(8)  |
| Rh02-Cl05     | 2.4247(15) | P03-Rh01-P08   | 92.01(6)  |
| Rh02-P06      | 2.2173(15) | C010-C01N      | 1.414(8)  |
| Rh02-P07      | 2.1920(16) | Cl04-Rh01-Cl05 | 80.95(5)  |
|               |            | C010-C01U      | 1.370(8)  |
|               |            | P08-Rh01-Cl04  | 96.16(5)  |
|               |            | C011-C01Z      | 1.384(10) |
|               |            | P08-Rh01-Cl05  | 164.68(6) |
|               |            | Cl05-Rh02-Cl04 | 80.98(5)  |
|               |            | C011-C026      | 1.503(9)  |
|               |            | P06-Rh02-Cl04  | 169.73(5) |
|               |            | C012-C027      | 1.504(9)  |
|               |            | C02H-C017-C00L | 120.4(6)  |
|               |            | C027-C019-C028 | 120.7(6)  |
|               |            | C00U-C01A-P06  | 117.4(4)  |
|               |            | C00U-C01A-C00X | 118.8(5)  |
|               |            | C00X-C01A-P06  | 123.3(4)  |
|               |            | C00O-C01B-C01G | 117.6(5)  |
|               |            | C00S-C01B-C00O | 122.9(5)  |
|               |            | C00S-C01B-C01G | 119.5(5)  |

|           |           |           |           |                |            |                |          |
|-----------|-----------|-----------|-----------|----------------|------------|----------------|----------|
| P03-C00F  | 1.819(6)  | C013-C01Y | 1.531(8)  | P06-Rh02-Cl05  | 89.64(5)   | C016-C01C-C00Q | 122.1(5) |
| P03-C00G  | 1.831(6)  | C014-C01H | 1.381(9)  | P07-Rh02-Cl04  | 98.70(5)   | C020-C01C-C00Q | 119.5(5) |
| P03-C010  | 1.854(6)  | C014-C034 | 1.494(9)  | P07-Rh02-Cl05  | 169.70(6)  | C020-C01C-C016 | 118.4(5) |
| P06-C00B  | 1.862(6)  | C015-C01D | 1.391(8)  | P07-Rh02-P06   | 89.79(6)   | C015-C01D-C029 | 121.0(6) |
| P06-C00L  | 1.831(6)  | C015-C01W | 1.382(8)  | C00F-P03-Rh01  | 121.80(19) | C01R-C01E-P08  | 126.7(5) |
| P06-C01A  | 1.831(6)  | C016-C01C | 1.431(8)  | C00F-P03-C00G  | 104.5(3)   | C01R-C01E-C02B | 118.2(5) |
| P07-C01J  | 1.836(6)  | C017-C02H | 1.387(9)  | C00F-P03-C010  | 103.4(2)   | C02B-C01E-P08  | 115.1(4) |
| P07-C028  | 1.838(6)  | C018-C01T | 1.470(9)  | C00G-P03-Rh01  | 108.8(2)   | C02M-C01F-C00Y | 119.1(6) |
| P07-C030  | 1.842(6)  | C019-C027 | 1.396(8)  | C00G-P03-C010  | 103.5(2)   | C01B-C01G-C00Q | 120.1(5) |
| P08-C015  | 1.833(6)  | C019-C028 | 1.403(8)  | C010-P03-Rh01  | 113.11(18) | C01J-C01G-C00Q | 120.0(5) |
| P08-C01E  | 1.841(6)  | C01B-C01G | 1.434(8)  | Rh01-Cl04-Rh02 | 95.77(5)   | C01J-C01G-C01B | 119.8(5) |
| P08-C025  | 1.851(6)  | C01C-C020 | 1.421(8)  | Rh02-Cl05-Rh01 | 95.53(5)   | C014-C01H-C01I | 122.2(6) |
| C009-C00B | 1.411(8)  | C01D-C029 | 1.396(9)  | C00B-P06-Rh02  | 121.15(19) | C00Z-C01I-C01H | 117.9(6) |
| C009-C00H | 1.360(8)  | C01E-C01R | 1.392(8)  | C00L-P06-Rh02  | 112.9(2)   | C00Z-C01I-C02E | 120.5(6) |
| C00A-C00K | 1.398(9)  | C01E-C02B | 1.397(8)  | C00L-P06-C00B  | 100.1(3)   | C01H-C01I-C02E | 121.5(6) |
| C00A-C013 | 1.379(9)  | C01F-C02M | 1.355(9)  | C00L-P06-C01A  | 106.6(3)   | C01G-C01J-P07  | 123.6(4) |
| C00B-C00Q | 1.376(8)  | C01G-C01J | 1.376(8)  | C01A-P06-Rh02  | 112.68(19) | C01G-C01J-C01M | 119.6(5) |
| C00C-C00F | 1.392(8)  | C01H-C01I | 1.392(9)  | C01A-P06-C00B  | 101.7(3)   | C01M-C01J-P07  | 115.3(4) |
| C00C-C013 | 1.383(8)  | C01I-C02E | 1.511(9)  | C01J-P07-Rh02  | 103.86(18) | C00I-C01K-C025 | 121.5(6) |
| C00D-C00N | 1.400(9)  | C01J-C01M | 1.441(8)  | C01J-P07-C028  | 104.0(3)   | C01V-C01L-C00R | 121.5(6) |
| C00D-C016 | 1.375(8)  | C01K-C025 | 1.422(8)  | C01J-P07-C030  | 107.7(3)   | C02A-C01M-C01J | 120.6(5) |
| C00E-C00L | 1.386(9)  | C01L-C01V | 1.350(9)  | C028-P07-Rh02  | 119.8(2)   | C02P-C01N-C010 | 121.4(6) |
| C00E-C01S | 1.382(9)  | C01M-C02A | 1.347(8)  | C028-P07-C030  | 96.3(3)    | C00M-C01P-C01Q | 118.8(6) |
| C00F-C022 | 1.401(8)  | C01N-C02P | 1.375(8)  | C030-P07-Rh02  | 123.4(2)   | C00M-C01P-C02T | 118.4(6) |
| C00G-C00J | 1.389(8)  | C01P-C01Q | 1.431(8)  | C015-P08-Rh01  | 121.7(2)   | C02T-C01P-C01Q | 122.8(6) |
| C00G-C00Z | 1.400(8)  | C01P-C02T | 1.429(9)  | C015-P08-C01E  | 107.5(3)   | C01P-C01Q-C01U | 117.3(5) |
| C00H-C020 | 1.406(8)  | C01Q-C01U | 1.504(8)  | C015-P08-C025  | 99.4(3)    | C025-C01Q-C01P | 120.8(6) |
| C00I-C00M | 1.411(10) | C01Q-C025 | 1.387(8)  | C01E-P08-Rh01  | 107.5(2)   | C025-C01Q-C01U | 121.9(5) |
| C00I-C01K | 1.356(9)  | C01R-C02J | 1.400(8)  | C01E-P08-C025  | 102.7(3)   | C01E-C01R-C02J | 121.6(6) |
| C00J-C014 | 1.398(8)  | C01S-C02C | 1.390(10) | C025-P08-Rh01  | 116.22(19) | C00E-C01S-C02C | 118.4(6) |
| C00K-C022 | 1.386(8)  | C01S-C02L | 1.525(9)  | C00H-C009-C00B | 122.5(6)   | C00E-C01S-C02L | 120.6(6) |
| C00K-C02X | 1.505(9)  | C01T-C024 | 1.399(8)  | C013-C00A-C00K | 121.5(6)   | C02C-C01S-C02L | 120.9(6) |
| C00L-C017 | 1.417(8)  | C01T-C02G | 1.390(9)  | C009-C00B-P06  | 119.4(4)   | C024-C01T-C018 | 121.6(6) |
| C00M-C01P | 1.413(9)  | C01V-C02Y | 1.399(10) | C00Q-C00B-P06  | 121.1(4)   | C02G-C01T-C018 | 121.6(6) |
| C00M-C02K | 1.431(9)  | C01W-C02U | 1.400(9)  | C00Q-C00B-C009 | 119.2(5)   | C02G-C01T-C024 | 116.8(6) |
| C00N-C023 | 1.371(9)  | C01X-C027 | 1.385(9)  | C013-C00C-C00F | 120.5(5)   | C00R-C01U-C01Q | 117.5(5) |
| C00O-C00Y | 1.361(8)  | C020-C023 | 1.415(8)  | C016-C00D-C00N | 120.5(6)   | C010-C01U-C00R | 120.4(5) |
| C00O-C01B | 1.422(8)  | C021-C02J | 1.505(8)  | C01S-C00E-C00L | 121.6(6)   | C010-C01U-C01Q | 122.1(5) |
| C00P-C00X | 1.390(8)  | C024-C030 | 1.395(8)  | C00C-C00F-P03  | 118.2(4)   | C01L-C01V-C02Y | 120.7(6) |
| C00P-C01O | 1.491(9)  | C029-C02N | 1.516(10) | C00C-C00F-C022 | 119.0(5)   | C015-C01W-C02U | 120.8(6) |
| C00P-C01Z | 1.397(9)  | C029-C032 | 1.394(10) | C022-C00F-P03  | 122.7(4)   | C027-C01X-C00T | 121.6(6) |
| C00Q-C01C | 1.439(8)  | C02B-C02O | 1.395(9)  | C00J-C00G-P03  | 123.4(5)   | C011-C01Z-C00P | 122.1(6) |
| C00Q-C01G | 1.506(7)  | C02C-C02H | 1.388(10) | C00J-C00G-C00Z | 118.9(5)   | C00H-C020-C01C | 119.0(5) |
| C00R-C01L | 1.409(9)  | C02D-C02I | 1.399(11) | C00Z-C00G-P03  | 117.6(4)   | C00H-C020-C023 | 121.5(6) |
| C00R-C01U | 1.448(8)  | C02D-C02K | 1.347(11) | C009-C00H-C020 | 120.0(5)   | C023-C020-C01C | 119.5(6) |

|           |          |           |           |                |          |                |          |
|-----------|----------|-----------|-----------|----------------|----------|----------------|----------|
| C00R-C02F | 1.413(8) | C02F-C02P | 1.394(9)  | C01K-C00I-C00M | 120.9(6) | C00K-C022-C00F | 121.2(6) |
| C00S-C01B | 1.423(8) | C02F-C02R | 1.428(8)  | C00G-C00J-C014 | 120.6(6) | C00N-C023-C020 | 120.5(6) |
| C00S-C02A | 1.415(8) | C02G-C02V | 1.377(9)  | C00A-C00K-C02X | 121.0(6) | C030-C024-C01T | 121.7(6) |
| C00S-C02M | 1.419(8) | C02H-C02W | 1.510(9)  | C022-C00K-C00A | 118.1(6) | C01K-C025-P08  | 120.0(5) |
| C00T-C00V | 1.382(8) | C02I-C02T | 1.351(9)  | C022-C00K-C02X | 120.9(6) | C01Q-C025-P08  | 121.2(4) |
| C00T-C01X | 1.409(9) | C02O-C02Z | 1.513(9)  | C00E-C00L-P06  | 125.5(5) | C01Q-C025-C01K | 118.6(6) |
| C00T-C02S | 1.495(8) | C02Q-C02V | 1.397(8)  | C00E-C00L-C017 | 118.8(6) | C019-C027-C012 | 118.6(6) |
| C00U-C011 | 1.400(9) | C02Q-C030 | 1.389(8)  | C017-C00L-P06  | 115.2(5) | C01X-C027-C012 | 122.5(6) |
| C00U-C01A | 1.392(8) | C02R-C02Y | 1.358(10) | C00I-C00M-C01P | 119.3(6) | C01X-C027-C019 | 118.8(6) |
| C00V-C028 | 1.386(8) | C02U-C031 | 1.488(10) | C00I-C00M-C02K | 122.5(6) | C00V-C028-P07  | 124.3(5) |
| C00W-C02J | 1.389(9) | C02U-C032 | 1.373(10) | C01P-C00M-C02K | 118.1(7) | C00V-C028-C019 | 118.9(5) |
| C00W-C02O | 1.369(9) | C02V-C033 | 1.509(9)  | C023-C00N-C00D | 120.7(6) | C019-C028-P07  | 116.2(4) |
|           |          |           |           | C00Y-C00O-C01B | 120.9(5) | C01D-C029-C02N | 121.3(7) |
|           |          |           |           | C00X-C00P-C01O | 121.5(6) | C032-C029-C01D | 117.2(6) |
|           |          |           |           | C00X-C00P-C01Z | 117.8(6) | C032-C029-C02N | 121.5(6) |
|           |          |           |           | C01Z-C00P-C01O | 120.6(6) | C01M-C02A-C00S | 121.5(5) |
|           |          |           |           | C00B-C00Q-C01C | 119.7(5) | C01E-C02B-C02O | 121.3(6) |
|           |          |           |           | C00B-C00Q-C01G | 120.6(5) | C01S-C02C-C02H | 122.1(6) |
|           |          |           |           | C01C-C00Q-C01G | 119.6(5) | C02K-C02D-C02I | 120.0(7) |
|           |          |           |           | C01L-C00R-C01U | 122.7(6) | C00R-C02F-C02R | 118.9(6) |
|           |          |           |           | C01L-C00R-C02F | 118.3(6) | C02P-C02F-C00R | 119.1(5) |
|           |          |           |           | C02F-C00R-C01U | 119.0(5) | C02P-C02F-C02R | 122.0(6) |
|           |          |           |           | C01B-C00S-C02M | 118.7(5) | C02V-C02G-C01T | 123.4(6) |
|           |          |           |           | C02A-C00S-C01B | 122.0(5) | C017-C02H-C02W | 118.7(6) |
|           |          |           |           | C02A-C00S-C02M | 119.3(6) | C02C-C02H-C017 | 120.4(6) |
|           |          |           |           | C00V-C00T-C01X | 118.0(6) | C02C-C02H-C02W | 120.9(6) |
|           |          |           |           | C00V-C00T-C02S | 121.8(6) | C02T-C02I-C02D | 120.9(7) |
|           |          |           |           | C01X-C00T-C02S | 120.1(6) | C00W-C02J-C01R | 117.7(6) |
|           |          |           |           | C01A-C00U-C011 | 120.6(6) | C00W-C02J-C021 | 121.0(5) |
|           |          |           |           | C00T-C00V-C028 | 121.9(6) | C01R-C02J-C021 | 121.3(6) |
|           |          |           |           | C02O-C00W-C02J | 122.7(6) | C02D-C02K-C00M | 121.5(7) |
|           |          |           |           | C00P-C00X-C01A | 121.7(6) | C01F-C02M-C00S | 121.6(6) |
|           |          |           |           | C00O-C00Y-C01F | 121.4(6) | C00W-C02O-C02B | 118.5(6) |
|           |          |           |           | C01I-C00Z-C00G | 121.5(6) | C00W-C02O-C02Z | 123.0(6) |
|           |          |           |           | C01N-C010-P03  | 120.1(4) | C02B-C02O-C02Z | 118.4(6) |
|           |          |           |           | C01U-C010-P03  | 120.5(4) | C01N-C02P-C02F | 120.9(6) |
|           |          |           |           | C01U-C010-C01N | 119.0(5) | C030-C02Q-C02V | 120.8(6) |
|           |          |           |           | C00U-C011-C026 | 119.9(6) | C02Y-C02R-C02F | 120.5(6) |
|           |          |           |           | C01Z-C011-C00U | 118.9(6) | C02I-C02T-C01P | 120.9(7) |
|           |          |           |           | C01Z-C011-C026 | 121.1(6) | C01W-C02U-C031 | 121.6(7) |
|           |          |           |           | C00A-C013-C00C | 119.6(5) | C032-C02U-C01W | 118.0(6) |
|           |          |           |           | C00A-C013-C01Y | 120.1(6) | C032-C02U-C031 | 120.2(6) |
|           |          |           |           | C00C-C013-C01Y | 120.3(6) | C02G-C02V-C02Q | 118.2(6) |
|           |          |           |           | C00J-C014-C034 | 120.0(6) | C02G-C02V-C033 | 121.5(6) |
|           |          |           |           | C01H-C014-C00J | 118.7(6) | C02Q-C02V-C033 | 120.3(6) |

|                |          |                |          |
|----------------|----------|----------------|----------|
| C01H-C014-C034 | 121.2(6) | C02R-C02Y-C01V | 120.1(6) |
| C01D-C015-P08  | 121.2(4) | C024-C030-P07  | 122.3(4) |
| C01W-C015-P08  | 118.6(5) | C02Q-C030-P07  | 118.4(4) |
| C01W-C015-C01D | 119.7(6) | C02Q-C030-C024 | 119.0(5) |
| C00D-C016-C01C | 120.4(6) | C02U-C032-C029 | 123.2(6) |

Table S24. Anisotropic Displacement Parameters ( $\text{\AA}^2 \times 10^3$ ) for **C4**. The Anisotropic displacement factor exponent takes the form:  $-2\pi^2[h^2a^{*2}U_{11}+2hka^*b^*U_{12}+\dots]$

|      | U <sub>11</sub> | U <sub>22</sub> | U <sub>33</sub> | U <sub>23</sub> | U <sub>13</sub> | U <sub>12</sub> |
|------|-----------------|-----------------|-----------------|-----------------|-----------------|-----------------|
| Rh01 | 26.6(2)         | 24.3(2)         | 25.7(2)         | -2.09(18)       | -0.68(19)       | 0.50(18)        |
| Rh02 | 23.7(2)         | 24.8(2)         | 29.9(2)         | -3.12(19)       | -1.0(2)         | -0.65(18)       |
| P03  | 24.0(7)         | 25.2(7)         | 24.3(7)         | -0.7(6)         | -0.2(6)         | -0.3(5)         |
| Cl04 | 27.0(7)         | 32.4(7)         | 29.7(7)         | -5.2(6)         | 0.9(6)          | -4.5(6)         |
| Cl05 | 25.5(7)         | 42.0(8)         | 36.6(7)         | -12.4(6)        | -1.0(6)         | -0.8(6)         |
| P06  | 23.5(7)         | 25.7(7)         | 29.6(8)         | -2.2(6)         | -1.2(6)         | 0.3(6)          |
| P07  | 23.2(7)         | 22.8(7)         | 30.4(8)         | -0.8(6)         | -1.1(6)         | -1.0(6)         |
| P08  | 27.9(8)         | 23.8(7)         | 33.4(8)         | 0.0(6)          | 1.8(6)          | -2.2(6)         |
| C009 | 21(3)           | 28(3)           | 33(3)           | 2(2)            | 4(2)            | -2(2)           |
| C00A | 31(3)           | 44(3)           | 33(3)           | 11(3)           | 7(3)            | -4(3)           |
| C00B | 22(3)           | 22(3)           | 33(3)           | -4(2)           | 0(2)            | 0(2)            |
| C00C | 22(3)           | 35(3)           | 32(3)           | 1(2)            | 1(2)            | -2(3)           |
| C00D | 36(3)           | 37(3)           | 29(3)           | -5(3)           | -3(3)           | -5(3)           |
| C00E | 31(3)           | 35(3)           | 37(4)           | -6(3)           | 0(3)            | 0(3)            |
| C00F | 24(3)           | 29(3)           | 29(3)           | 2(2)            | 2(2)            | -1(2)           |
| C00G | 25(3)           | 25(3)           | 30(3)           | -7(2)           | 1(2)            | 0(2)            |
| C00H | 27(3)           | 24(3)           | 37(3)           | 3(2)            | 5(3)            | -3(2)           |
| C00I | 26(3)           | 38(4)           | 56(4)           | 11(3)           | 1(3)            | 5(3)            |
| C00J | 28(3)           | 31(3)           | 35(3)           | -3(3)           | 2(3)            | -3(2)           |
| C00K | 36(3)           | 46(4)           | 31(3)           | -1(3)           | -2(3)           | -2(3)           |
| C00L | 32(3)           | 31(3)           | 27(3)           | 2(2)            | 0(3)            | -4(3)           |
| C00M | 27(3)           | 47(4)           | 39(4)           | 14(3)           | -3(3)           | -2(3)           |
| C00N | 37(4)           | 29(3)           | 46(4)           | -10(3)          | -8(3)           | -5(3)           |
| C00O | 26(3)           | 30(3)           | 34(3)           | 0(2)            | -1(3)           | -4(2)           |
| C00P | 35(4)           | 41(4)           | 33(3)           | -5(3)           | 1(3)            | 9(3)            |
| C00Q | 22(3)           | 20(3)           | 31(3)           | -1(2)           | -1(2)           | 1(2)            |
| C00R | 27(3)           | 35(3)           | 28(3)           | -4(3)           | 2(2)            | -4(3)           |
| C00S | 34(3)           | 26(3)           | 31(3)           | 4(2)            | 1(3)            | -1(2)           |
| C00T | 35(3)           | 26(3)           | 36(3)           | 0(3)            | 5(3)            | -1(2)           |
| C00U | 32(3)           | 32(3)           | 37(3)           | -8(3)           | -3(3)           | 2(3)            |

|      | $U_{11}$ | $U_{22}$ | $U_{33}$ | $U_{23}$ | $U_{13}$ | $U_{12}$ |
|------|----------|----------|----------|----------|----------|----------|
| C00V | 25(3)    | 27(3)    | 33(3)    | 1(2)     | -3(2)    | 2(2)     |
| C00W | 38(4)    | 25(3)    | 43(4)    | -4(3)    | -9(3)    | 7(3)     |
| C00X | 28(3)    | 34(3)    | 34(3)    | -7(3)    | -1(2)    | -2(2)    |
| C00Y | 31(3)    | 37(3)    | 37(3)    | -1(3)    | -4(3)    | -4(3)    |
| C00Z | 32(3)    | 35(3)    | 25(3)    | -6(3)    | -5(2)    | 3(2)     |
| C010 | 30(3)    | 21(3)    | 23(3)    | -3(2)    | 3(2)     | -1(2)    |
| C011 | 44(4)    | 30(3)    | 34(3)    | -9(3)    | -2(3)    | 3(3)     |
| C012 | 26(3)    | 47(4)    | 49(4)    | 6(3)     | -2(3)    | 0(3)     |
| C013 | 23(3)    | 36(3)    | 40(3)    | 4(3)     | 0(3)     | 0(2)     |
| C014 | 26(3)    | 46(4)    | 40(4)    | -11(3)   | 2(3)     | 0(3)     |
| C015 | 30(3)    | 27(3)    | 33(3)    | -5(3)    | 1(3)     | -2(2)    |
| C016 | 27(3)    | 29(3)    | 32(3)    | 0(2)     | -2(2)    | -4(2)    |
| C017 | 32(3)    | 35(3)    | 32(3)    | -4(3)    | -3(3)    | -3(2)    |
| C018 | 46(4)    | 37(4)    | 60(4)    | -20(3)   | 10(4)    | -1(3)    |
| C019 | 31(3)    | 22(3)    | 38(3)    | -2(3)    | 1(3)     | -5(2)    |
| C01A | 29(3)    | 24(3)    | 29(3)    | -1(2)    | 1(2)     | 4(2)     |
| C01B | 28(3)    | 27(3)    | 28(3)    | -2(2)    | 0(2)     | -2(2)    |
| C01C | 19(3)    | 26(3)    | 36(3)    | -2(2)    | 2(2)     | 0(2)     |
| C01D | 36(3)    | 32(3)    | 33(3)    | -7(2)    | 3(3)     | -3(3)    |
| C01E | 29(3)    | 24(3)    | 38(3)    | -4(2)    | -2(3)    | 0(2)     |
| C01F | 36(4)    | 39(3)    | 36(3)    | 5(3)     | -4(3)    | 7(3)     |
| C01G | 28(3)    | 24(3)    | 23(3)    | -5(2)    | 3(2)     | -2(2)    |
| C01H | 34(4)    | 45(4)    | 47(4)    | -15(3)   | -10(3)   | 11(3)    |
| C01I | 42(4)    | 36(3)    | 34(3)    | -7(3)    | -3(3)    | 7(3)     |
| C01J | 30(3)    | 24(3)    | 26(3)    | -5(2)    | 2(2)     | 0(2)     |
| C01K | 32(3)    | 34(3)    | 47(4)    | 2(3)     | 4(3)     | 4(3)     |
| C01L | 35(4)    | 39(3)    | 37(3)    | -2(3)    | -3(3)    | 2(3)     |
| C01M | 30(3)    | 25(3)    | 32(3)    | -2(2)    | 2(2)     | -9(3)    |
| C01N | 32(3)    | 27(3)    | 31(3)    | -9(3)    | 0(3)     | -1(2)    |
| C01O | 35(4)    | 47(4)    | 35(3)    | -7(3)    | -3(3)    | 14(3)    |
| C01P | 22(3)    | 44(3)    | 37(3)    | 10(3)    | -4(3)    | 0(3)     |
| C01Q | 18(3)    | 37(3)    | 34(3)    | 4(3)     | -2(2)    | -2(2)    |
| C01R | 28(3)    | 29(3)    | 42(4)    | -2(3)    | -7(3)    | 1(2)     |
| C01S | 39(4)    | 43(4)    | 30(3)    | -6(3)    | 0(3)     | -9(3)    |
| C01T | 28(3)    | 34(3)    | 49(4)    | -5(3)    | -3(3)    | 3(3)     |
| C01U | 30(3)    | 28(3)    | 27(3)    | 2(2)     | 2(2)     | 1(2)     |
| C01V | 30(3)    | 54(4)    | 51(4)    | -11(3)   | -8(3)    | -2(3)    |
| C01W | 34(3)    | 35(3)    | 32(3)    | -1(3)    | 7(3)     | -2(3)    |
| C01X | 29(3)    | 29(3)    | 40(4)    | 1(3)     | 8(3)     | 1(2)     |
| C01Y | 48(4)    | 36(3)    | 45(4)    | 8(3)     | 4(4)     | -4(3)    |
| C01Z | 48(4)    | 32(3)    | 42(4)    | -5(3)    | -2(3)    | 12(3)    |
| C020 | 24(3)    | 27(3)    | 37(3)    | -5(2)    | -2(3)    | -3(2)    |
| C021 | 36(4)    | 33(3)    | 49(4)    | -5(3)    | -3(3)    | 5(3)     |
| C022 | 33(3)    | 37(3)    | 32(3)    | -4(3)    | 3(3)     | -4(3)    |

|      | $U_{11}$ | $U_{22}$ | $U_{33}$ | $U_{23}$ | $U_{13}$ | $U_{12}$ |
|------|----------|----------|----------|----------|----------|----------|
| C023 | 35(3)    | 24(3)    | 50(4)    | 0(3)     | -4(3)    | -8(3)    |
| C024 | 27(3)    | 27(3)    | 38(3)    | -1(2)    | 0(3)     | 0(2)     |
| C025 | 22(3)    | 29(3)    | 40(4)    | 6(3)     | 0(3)     | 2(2)     |
| C026 | 60(5)    | 28(4)    | 65(5)    | -2(3)    | -6(4)    | 3(3)     |
| C027 | 29(3)    | 25(3)    | 38(3)    | -3(3)    | 3(3)     | -2(2)    |
| C028 | 26(3)    | 24(3)    | 34(3)    | -1(2)    | 5(3)     | -1(2)    |
| C029 | 36(4)    | 50(4)    | 41(4)    | -17(3)   | 8(3)     | -8(3)    |
| C02A | 33(3)    | 25(3)    | 39(3)    | 6(3)     | 2(3)     | -1(2)    |
| C02B | 34(3)    | 24(3)    | 45(4)    | -1(3)    | 3(3)     | 3(2)     |
| C02C | 50(4)    | 38(4)    | 23(3)    | 2(3)     | -2(3)    | -8(3)    |
| C02D | 45(4)    | 75(6)    | 35(4)    | 19(4)    | -4(3)    | 3(4)     |
| C02E | 56(5)    | 57(4)    | 43(4)    | 6(3)     | -6(4)    | 22(4)    |
| C02F | 34(3)    | 33(3)    | 28(3)    | -8(2)    | 4(3)     | -6(3)    |
| C02G | 34(3)    | 20(3)    | 62(4)    | -6(3)    | -3(3)    | -3(3)    |
| C02H | 43(4)    | 36(3)    | 37(4)    | -3(3)    | -13(3)   | -1(3)    |
| C02I | 49(4)    | 56(4)    | 35(4)    | 0(3)     | -4(3)    | -4(3)    |
| C02J | 33(3)    | 31(3)    | 34(3)    | -4(3)    | -3(3)    | 7(2)     |
| C02K | 36(4)    | 56(5)    | 47(4)    | 20(4)    | -7(3)    | 6(3)     |
| C02L | 41(4)    | 73(5)    | 38(4)    | 5(4)     | 9(3)     | -5(4)    |
| C02M | 36(4)    | 29(3)    | 40(4)    | 1(3)     | 1(3)     | 4(3)     |
| C02N | 39(4)    | 63(5)    | 58(5)    | -26(4)   | 7(4)     | -10(4)   |
| C02O | 34(3)    | 29(3)    | 44(4)    | 7(3)     | -6(3)    | -2(3)    |
| C02P | 40(3)    | 26(3)    | 32(3)    | -1(3)    | 4(3)     | -3(3)    |
| C02Q | 25(3)    | 32(3)    | 35(3)    | 2(2)     | 1(3)     | 0(3)     |
| C02R | 47(4)    | 31(3)    | 38(3)    | -11(3)   | 7(3)     | -10(3)   |
| C02S | 43(4)    | 49(4)    | 39(4)    | 11(3)    | 5(3)     | 11(3)    |
| C02T | 36(4)    | 46(4)    | 34(3)    | 9(3)     | -4(3)    | -2(3)    |
| C02U | 52(4)    | 32(3)    | 36(3)    | -4(3)    | 11(3)    | -7(3)    |
| C02V | 33(3)    | 30(3)    | 54(4)    | 6(3)     | 3(3)     | -1(3)    |
| C02W | 51(4)    | 59(5)    | 48(4)    | 10(4)    | -18(4)   | 1(4)     |
| C02X | 57(5)    | 65(5)    | 31(3)    | -4(3)    | 5(3)     | -4(4)    |
| C02Y | 32(4)    | 53(4)    | 53(4)    | -19(4)   | 3(3)     | -16(3)   |
| C02Z | 45(4)    | 31(4)    | 71(5)    | -6(3)    | -1(4)    | -7(3)    |
| C030 | 23(3)    | 24(3)    | 39(3)    | -2(2)    | -3(3)    | -3(2)    |
| C031 | 76(5)    | 37(4)    | 49(4)    | 9(3)     | 14(4)    | -19(4)   |
| C032 | 46(4)    | 35(3)    | 49(4)    | -13(3)   | 15(3)    | -14(3)   |
| C033 | 65(5)    | 31(3)    | 66(5)    | 13(3)    | 5(4)     | -2(3)    |
| C034 | 35(4)    | 91(7)    | 69(6)    | 8(5)     | 14(4)    | 7(4)     |



Table S25: Hydrogen Atom Coordinates ( $\text{\AA}\times 10^4$ ) and Isotropic Displacement Parameters ( $\text{\AA}^2\times 10^3$ ) for C4

|      | <i>x</i> | <i>y</i> | <i>z</i> | U(eq) |
|------|----------|----------|----------|-------|
| H009 | 2264.95  | 4636.98  | 6287.75  | 33    |
| H00A | 5495.1   | 5747.65  | 9762.37  | 43    |
| H00C | 5622.33  | 5853.59  | 8132.49  | 36    |
| H00D | 1966.78  | 4466.13  | 3504.44  | 41    |
| H00E | 1325.71  | 5713.44  | 6856.39  | 41    |
| H00H | 1823.82  | 3897.6   | 5750.01  | 35    |
| H00I | 8245.84  | 5191.95  | 8782.1   | 48    |
| H00J | 4193.15  | 7249.37  | 8554.24  | 38    |
| H00N | 1644.31  | 3592.15  | 3897.53  | 45    |
| H00O | 893.51   | 5691.23  | 4739.58  | 36    |
| H00U | 3319.55  | 6915.13  | 5962.24  | 41    |
| H00V | 5024.01  | 5940.17  | 4129.75  | 34    |
| H00W | 8091.14  | 4367.72  | 6225.51  | 43    |
| H00X | 993.38   | 5950.94  | 5994.87  | 38    |
| H00Y | -179.49  | 6284.81  | 4354.53  | 42    |
| H00Z | 5213.8   | 7804.59  | 7119.04  | 37    |
| H01A | 8309.18  | 5114.19  | 5099.46  | 61    |
| H01B | 8173.74  | 5663.03  | 5466.37  | 61    |
| H01C | 8721.73  | 5704.46  | 4901.78  | 61    |
| H016 | 2335.53  | 5233.08  | 4043.49  | 35    |
| H017 | 3994.09  | 5148.6   | 6930.87  | 40    |
| H01D | 3844.41  | 4084.56  | 3713.29  | 72    |
| H01E | 4216.89  | 3487.68  | 3919.23  | 72    |
| H01F | 4941.31  | 3962.68  | 3735.97  | 72    |
| H019 | 6494.18  | 5550.91  | 5480.05  | 37    |
| H01G | 9518     | 6452.68  | 7377.62  | 41    |
| H01H | 244.76   | 7191.92  | 4065.4   | 44    |
| H01I | 2776.61  | 8404.41  | 7684.22  | 50    |
| H01K | 7983.64  | 5406.97  | 7889.22  | 45    |
| H01L | 9428.57  | 7084.31  | 8528.81  | 44    |
| H01M | 4513.12  | 6711.86  | 4776.54  | 35    |
| H01N | 6151.32  | 8218.45  | 7820.4   | 36    |
| H01J | -475.16  | 6312.03  | 5745.18  | 58    |
| H01O | -480.97  | 6865.69  | 5376.59  | 58    |
| H01P | -619.72  | 6915.25  | 6019.48  | 58    |
| H01R | 9138.77  | 5861.37  | 6700.4   | 40    |

|      | <i>x</i> | <i>y</i> | <i>z</i> | U(eq) |
|------|----------|----------|----------|-------|
| H01V | 10649.68 | 7690.67  | 8634.6   | 54    |
| H01W | 7538.43  | 7505.2   | 6806.88  | 40    |
| H01X | 7825.13  | 5775.45  | 4051.07  | 39    |
| H01Q | 5945.39  | 4905.49  | 9172.05  | 65    |
| H01S | 5698.01  | 4950.45  | 8539.98  | 65    |
| H01T | 4879.81  | 4940.27  | 8981.76  | 65    |
| H01Z | 811.39   | 7591.4   | 5598.12  | 49    |
| H02A | 9821.53  | 5226.96  | 5876.24  | 59    |
| H02B | 9625.34  | 4573.44  | 5977.49  | 59    |
| H02C | 10173.34 | 4933.64  | 6423.82  | 59    |
| H022 | 5743.27  | 7266.88  | 9047.34  | 41    |
| H023 | 1653.94  | 3482.62  | 4830.37  | 44    |
| H024 | 4416.05  | 4941.43  | 4291.09  | 37    |
| H02D | 2341.31  | 8019.89  | 5257.06  | 76    |
| H02E | 3275.23  | 7811.01  | 5549.98  | 76    |
| H02F | 2509.05  | 8154.58  | 5886.07  | 76    |
| H02G | 3399.69  | 7302.84  | 4442.7   | 39    |
| H02H | 6479.83  | 5441.89  | 7062.76  | 41    |
| H02I | 2104.37  | 4651.59  | 8044.23  | 45    |
| H02J | 8254.37  | 6182.48  | 10401.97 | 62    |
| H02K | 3554.18  | 8398.03  | 6566.48  | 78    |
| H02L | 4572.19  | 8632.83  | 6705.91  | 78    |
| H02M | 3670.12  | 8926.2   | 6962.8   | 78    |
| H02N | 4364.48  | 3352.33  | 4851.2   | 46    |
| H02O | 8060.39  | 7121.95  | 10142.1  | 56    |
| H02P | 8339.42  | 5492.28  | 9758.62  | 56    |
| H02Q | 165.79   | 4960.69  | 7437.71  | 76    |
| H02R | 330.67   | 5554.72  | 7726.46  | 76    |
| H02S | 547.06   | 4985.15  | 8047.88  | 76    |
| H02T | 1759.87  | 7490.25  | 4169.08  | 43    |
| H02U | 11087.93 | 6790.35  | 7548.24  | 80    |
| H02V | 11331.03 | 7438.07  | 7446.65  | 80    |
| H02W | 11384.27 | 6999.35  | 6955.3   | 80    |
| H02X | 7396.55  | 8824.07  | 7922.7   | 39    |
| H02Y | 4474.96  | 4641.17  | 5905.82  | 37    |
| H02Z | 9069.84  | 8991.83  | 8136.79  | 46    |
| H02  | 5752.35  | 5949.02  | 3259.73  | 65    |
| H    | 6800.91  | 5725.35  | 3206.72  | 65    |
| HA   | 6607.27  | 6374.9   | 3330.9   | 65    |
| H1   | 7803.05  | 7354.3   | 9253.12  | 46    |
| H2   | 4218.59  | 4262.8   | 7542.05  | 79    |
| HB   | 3607.78  | 4258.59  | 8085.81  | 79    |
| HC   | 4354.1   | 4747.55  | 7985.3   | 79    |
| H3   | 6097.96  | 6707.27  | 10258.73 | 76    |

|      | <i>x</i> | <i>y</i> | <i>z</i> | U(eq) |
|------|----------|----------|----------|-------|
| HD   | 4984.37  | 6735.27  | 10224.82 | 76    |
| HE   | 5599.56  | 7242.98  | 9994.26  | 76    |
| H4   | 10491.8  | 8642.99  | 8412.1   | 55    |
| H5   | 5912.23  | 4519.68  | 6897.03  | 73    |
| HF   | 6537.34  | 4063.14  | 6588.7   | 73    |
| HG   | 6002.77  | 4537.75  | 6249.69  | 73    |
| H03A | 7882.04  | 8465.1   | 6643.6   | 81    |
| H03B | 8905.66  | 8588.9   | 6413.96  | 81    |
| H03C | 8677.83  | 8694     | 7041.83  | 81    |
| H032 | 10198.37 | 8027.15  | 6921.53  | 52    |
| H03D | 3860.29  | 3322.7   | 5940     | 81    |
| H03E | 4573.84  | 3725.03  | 6253.72  | 81    |
| H03F | 4959.88  | 3246.16  | 5856.88  | 81    |
| H03G | 2469.53  | 7445.45  | 8713.65  | 97    |
| H03H | 2050.56  | 8008.68  | 8455.96  | 97    |
| H03I | 2833.77  | 8044.94  | 8917.5   | 97    |

**Figure S11:** Single crystal x-ray structure of **C4** with thermal ellipsoids drawn at 30% probability. Hydrogen atoms have been omitted for clarity.

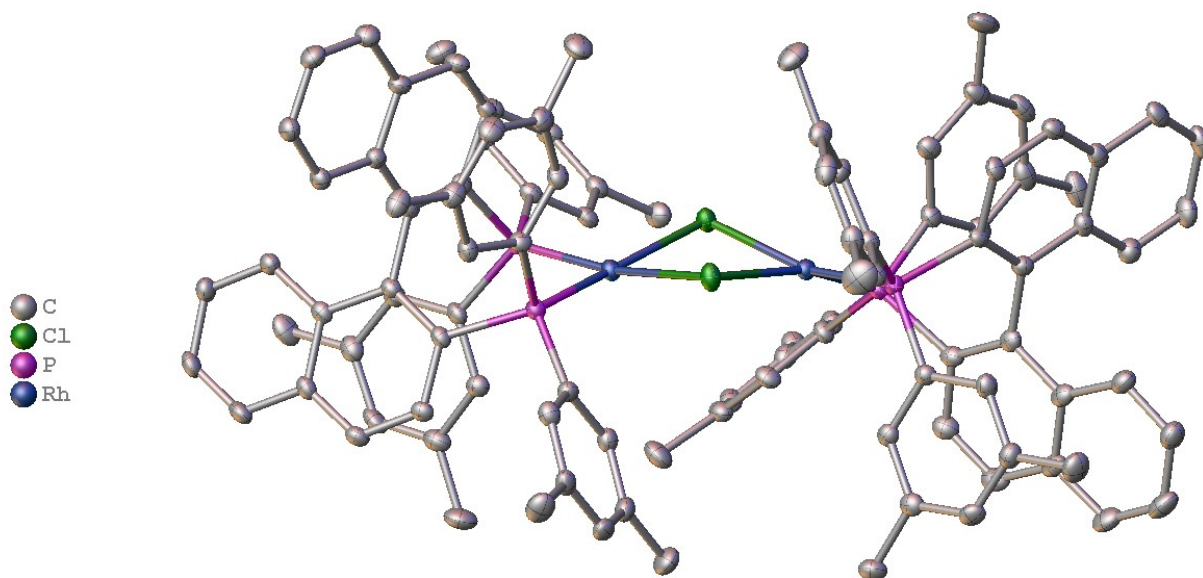

**Additional Figures:**

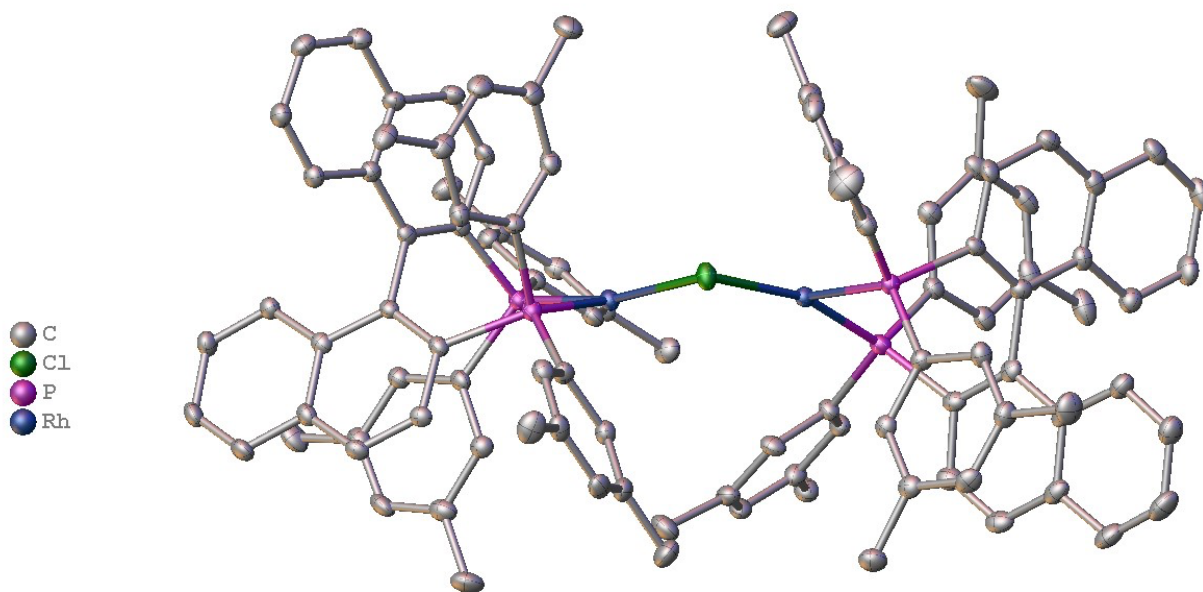

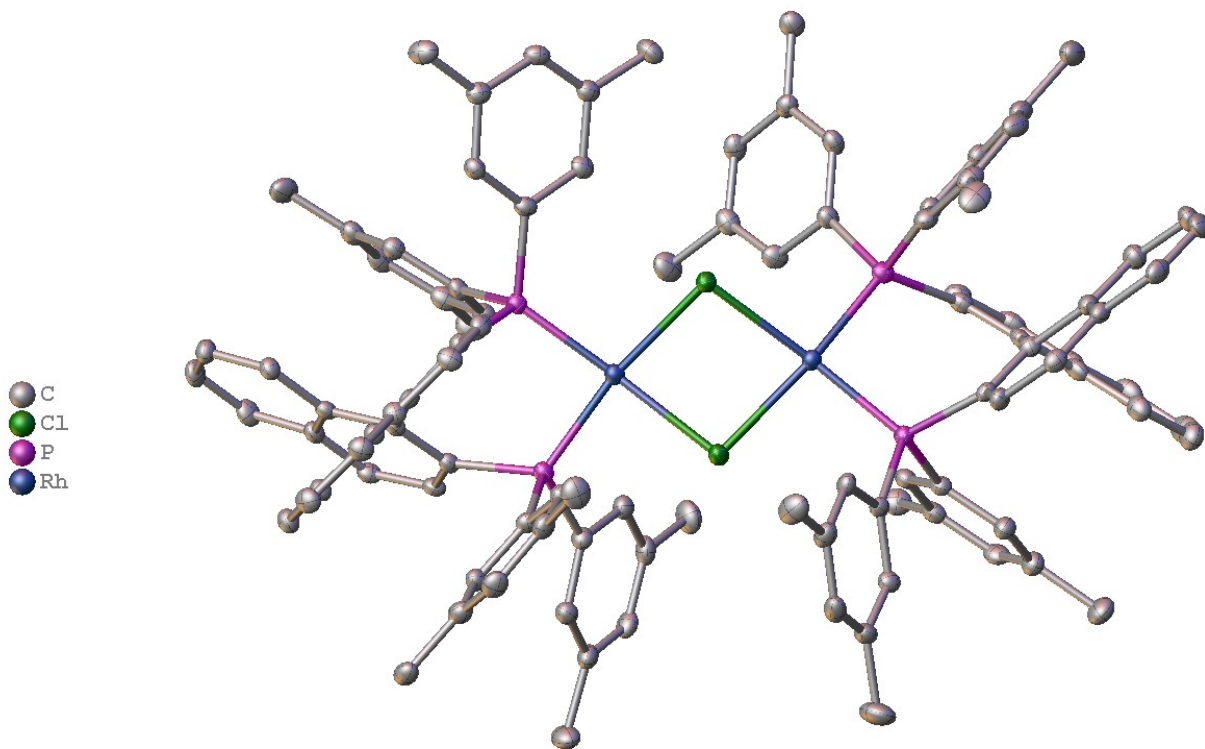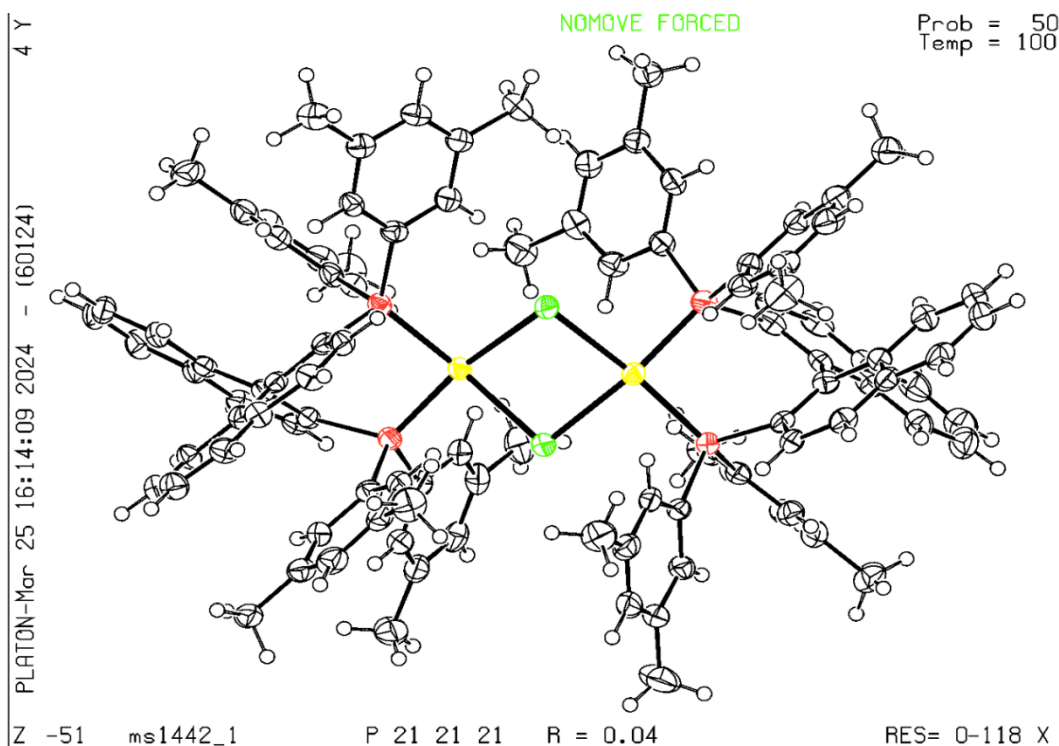

**Experimental:**

Dark brown single crystals of **C4** suitable for X-ray diffraction studies were grown via layering pentanes onto chlorobenzene solution. Single-crystal X-ray diffraction studies were conducted at Los Alamos National Laboratory on a Bruker D8 Quest diffractometer using a Mo K $\alpha$  ( $\lambda = 0.71073$  Å) I $\mu$ S 3.0 Microfocus source X-ray generator and a Photon II detector at 100(1) K. Data collection and cell parameter determinations were performed via the SMART software package.<sup>5</sup> Data reduction was performed via the SAINT software package.<sup>6</sup> Absorption corrections were carried out via the multiscan SADABS method.<sup>7</sup> Structure solution, refinement, and publication materials were generated via SHELXT, SHELXL, and Olex2.<sup>8-10</sup> Hydrogen atoms were attached via the riding model at calculated positions. Crystallographic data for **C4** has been deposited in the Cambridge Structural Data base (2351158).

## 5. References

1. Arias-Ugarte, R.; Sharma, H. K.; Morris, A. L.C.; Pannell, K. H.; *J. Am. Chem. Soc.* **2012**, *134*, 848-851.
2. Cheng, C.; Hartwig, J. F. *Science*. **2014**, *343*, 854-857.
3. Fang, H.; Guo, L.; Zhang, Y.; Yao, W.; Huang, Z. *Org. Lett.* **2016**, *18*, 5624-5627
4. Ota, K.; Yamasaki, H.; Watanabe, S.; Masuda Y.; Murata, M. *Synlett*. **2007**, *9*, 1387-1390
5. *SMART Apex II*, ver. 5.632. Bruker AXS Inc., Madison, Wisconsin, **2005**.
6. *SAINTE Software User's Guide*, ver. 7.34a; Bruker AXS Inc., Madison, Wisconsin, **2005**.
7. G. M. Sheldrick, *SADABS*, University of Göttingen; Göttingen, Germany, **2005**.
8. G. M. Sheldrick, *Acta Cryst.*, **2015**, *A71*, 3-8.
9. G. M. Sheldrick, *Acta Cryst.*, **2015**, *C71*, 3-8.
10. O. V. Dolomanov, L. J. Bourhis, R. J. Gildea, J. A. K. Howard, H. Puschmann, *J. Appl. Cryst.*, **2009**, *42*, 339-341.
